# Supplementary material for: Designing heat exchanger using EDTR method and python as a computational tool
Source: publisher site journal article supplement (doi:10.1515/ijcre-2025-0013), 2025-11-01
Supplement: Supplementary file 1 [file j_ijcre-2025-0013_suppl_001.docx]

**Data for Kern Method**

Sheet 1

| 101 | 1 | Acetaldehyde | C-{2} H-{4} O | 75-07-0 | 44.05256 | -10.976 | 755.12 | 0 | 0 | 0 | 149.78 | 0.002647 | 294.15 | 0.0002229 |
| --- | --- | --- | --- | --- | --- | --- | --- | --- | --- | --- | --- | --- | --- | --- |
| 101 | 2 | Acetamide | C-{2} H-{5} NO | 60-35-5 | 59.0672 | 1.5525 | 1376.4 | -2.0126 | 0 | 0 | 353.33 | 0.001728 | 494.3 | 0.0002895 |
| 101 | 3 | Acetic acid | C-{2} H-{4} O-{2} | 64-19-7 | 60.052 | -9.03 | 1212.3 | -0.322 | 0 | 0 | 289.81 | 0.001265 | 391.05 | 0.000389 |
| 101 | 4 | Acetic anhydride | C-{4} H-{6} O-{3} | 108-24-7 | 102.08864 | -20.457 | 1638.6 | 1.3834 | 0 | 0 | 200.15 | 0.007159 | 412.7 | 0.0002874 |
| 101 | 5 | Acetone | C-{3} H-{6} O | 67-64-1 | 58.07914 | -14.918 | 1023.4 | 0.5961 | 0 | 0 | 190 | 0.001655 | 329.44 | 0.0002351 |
| 101 | 6 | Acetonitrile | C-{2} H-{3} N | 75-05-8 | 41.0519 | 5.4711 | 143.99 | -2.4432 | 0 | 0 | 229.32 | 0.0007616 | 354.81 | 0.00021 |
| 101 | 7 | Acetylene | C-{2} H-{2} | 74-86-2 | 26.03728 | 6.224 | -151.8 | -2.6554 | 0 | 0 | 193.15 | 0.0001958 | 273.15 | 0.00009819 |
| 101 | 8 | Acrolein | C-{3} H-{4} O | 107-02-8 | 56.06326 | -12.032 | 867.34 | 0.19534 | 0 | 0 | 185.45 | 0.001773 | 353.22 | 0.0002181 |
| 101 | 9 | Acrylic acid | C-{3} H-{4} O-{2} | 79-10-7 | 72.06266 | -28.12 | 2280.2 | 2.3956 | 0 | 0 | 286.15 | 0.001359 | 460 | 0.0002086 |
| 101 | 10 | Acrylonitrile | C-{3} H-{3} N | 107-13-1 | 53.0626 | -0.24126 | 350.57 | -1.5676 | 0 | 0 | 189.63 | 0.00134 | 350.45 | 0.0002191 |
| 101 | 11 | Air | Mixture | 132259-10-0 | 28.96 | -20.077 | 285.15 | 1.784 | -6.238e-22 | 10 | 59.15 | 0.000343 | 130 | 0.00004276 |
| 101 | 12 | Ammonia | H-{3} N | 7664-41-7 | 17.03052 | -6.743 | 598.3 | -0.7341 | -3.69E-27 | 10 | 195.41 | 0.000524 | 393.15 | 0.00004858 |
| 101 | 13 | Anisole | C-{7} H-{8} O | 100-66-3 | 108.13782 | -15.407 | 1518.7 | 0.60172 | 0 | 0 | 235.65 | 0.003429 | 426.73 | 0.0002736 |
| 101 | 14 | Argon | Ar | 7440-37-1 | 39.948 | -8.8685 | 204.29 | -0.38305 | -1.29E-22 | 10 | 83.78 | 0.000295 | 150 | 0.00003823 |
| 101 | 15 | Benzamide | C-{7} H-{7} NO | 55-21-0 | 121.13658 | -12.632 | 2668.2 |  | 0 | 0 | 403 | 0.002451 | 563.15 | 0.000373 |
| 101 | 16 | Benzene | C-{6} H-{6} | 71-43-2 | 78.11184 | 7.5117 | 294.68 | -2.794 | 0 | 0 | 278.68 | 0.0007761 | 545 | 0.00007106 |
| 101 | 17 | Benzenethiol | C-{6} H-{6} S | 108-98-5 | 110.17684 | -8.4562 | 1024.4 | -0.30635 | 0 | 0 | 258.27 | 0.002047 | 442.29 | 0.0003333 |
| 101 | 18 | Benzoic acid | C-{7} H-{6} O-{2} | 65-85-0 | 122.12134 | -12.947 | 2557.9 |  | 0 | 0 | 395.52 | 0.001534 | 600.8 | 0.0001683 |
| 101 | 19 | Benzonitrile | C-{7} H-{5} N | 100-47-0 | 103.1213 | -23.268 | 1880.5 | 1.7994 | 0 | 0 | 260.28 | 0.002393 | 464.15 | 0.0002836 |
| 101 | 20 | Benzophenone | C-{13} H-{10} O | 119-61-9 | 182.2179 | -148.6 | 8377.2 | 20.559 | -0.0000133 | 2 | 321.35 | 0.005369 | 664 | 0.0002614 |
| 101 | 21 | Benzyl alcohol | C-{7} H-{8} O | 100-51-6 | 108.13782 | -14.152 | 2652 |  | 0 | 0 | 257.85 | 0.02092 | 478.6 | 0.0001821 |
| 101 | 22 | Benzyl ethyl ether | C-{9} H-{12} O | 539-30-0 | 136.19098 | -11.46 | 1497 | -0.043397 | 0 | 0 | 275.65 | 0.001886 | 458.15 | 0.0002121 |
| 101 | 23 | Benzyl mercaptan | C-{7} H-{8} S | 100-53-8 | 124.20342 | -11.459 | 1334.4 | 0.00049694 | 0 | 0 | 243.95 | 0.002513 | 472.03 | 0.0001788 |
| 101 | 24 | Biphenyl | C-{12} H-{10} | 92-52-4 | 154.2078 | -9.9265 | 1576.3 | -0.21119 | 0 | 0 | 342.2 | 0.001427 | 723.15 | 0.0001076 |
| 101 | 25 | Bromine | Br-{2} | 7726-95-6 | 159.808 | 16.775 | -314 | -3.9763 | 0 | 0 | 265.85 | 0.001353 | 350 | 0.0006021 |
| 101 | 26 | Bromobenzene | C-{6} H-{5} Br | 108-86-1 | 157.0079 | -20.611 | 1656.5 | 1.4415 | 0 | 0 | 242.43 | 0.002842 | 429.24 | 0.000331 |
| 101 | 27 | Bromoethane | C-{2} H-{5} Br | 74-96-4 | 108.965 | -5.0539 | 645.8 | -0.87689 | 0 | 0 | 154.25 | 0.005065 | 393.15 | 0.0001751 |
| 101 | 28 | Bromomethane | CH-{3} Br | 74-83-9 | 94.93852 | -16.615 | 931.44 | 0.94366 | 0 | 0 | 179.44 | 0.001464 | 363.15 | 0.000206 |
| 101 | 29 | 1,2-Butadiene | C-{4} H-{6} | 590-19-2 | 54.09044 | -10.143 | 472.79 | -0.028241 | 0 | 0 | 136.95 | 0.001081 | 284 | 0.0001773 |
| 101 | 30 | 1,3-Butadiene | C-{4} H-{6} | 106-99-0 | 54.09044 | 17.844 | -310.2 | -4.5058 | 0 | 0 | 250 | 0.0002547 | 400 | 0.0000488 |
| 101 | 31 | Butane | C-{4} H-{10} | 106-97-8 | 58.1222 | -7.2471 | 534.82 | -0.57469 | -4.66E-27 | 10 | 134.86 | 0.002243 | 420 | 0.00003566 |
| 101 | 32 | 1,2-Butanediol | C-{4} H-{10} O-{2} | 584-03-2 | 90.121 | -393.86 | 19,042 | 59.978 | -0.049479 | 1 | 220 | 202 | 544 | 0.0003441 |
| 101 | 33 | 1,3-Butanediol | C-{4} H-{10} O-{2} | 107-88-0 | 90.121 | -390.03 | 18,609 | 60.014 | -0.055844 | 1 | 196.15 | 44100 | 540.8 | 0.000289 |
| 101 | 34 | 1-Butanol | C-{4} H-{10} O | 71-36-3 | 74.1216 | -82.851 | 4481.8 | 11.182 | -0.000020943 | 2 | 190 | 0.2602 | 391.9 | 0.0003845 |
| 101 | 35 | 2-Butanol | C-{4} H-{10} O | 78-92-2 | 74.1216 | -16.323 | 3141.7 | 0 | 0 | 0 | 238 | 0.04404 | 372.9 | 0.0003715 |
| 101 | 36 | 1-Butene | C-{4} H-{8} | 106-98-9 | 56.10632 | -10.773 | 591.61 | 0 | 0 | 0 | 87.8 | 0.01769 | 335.6 | 0.0001222 |
| 101 | 37 | cis-2-Butene | C-{4} H-{8} | 590-18-1 | 56.10632 | -10.346 | 522.3 | -0.011847 | 0 | 0 | 134.26 | 0.001483 | 276.87 | 0.0001982 |
| 101 | 38 | trans-2-Butene | C-{4} H-{8} | 624-64-6 | 56.10632 | -10.335 | 521.39 | -0.013184 | 0 | 0 | 167.62 | 0.000681 | 274.03 | 0.0002022 |
| 101 | 39 | Butyl acetate | C-{6} H-{12} O-{2} | 123-86-4 | 116.15828 | -17.488 | 1478.2 | 0.91828 | 0 | 0 | 250 | 0.001496 | 399.26 | 0.0002521 |
| 101 | 40 | Butylbenzene | C-{10} H-{14} | 104-51-8 | 134.21816 | -23.802 | 1887.2 | 1.8479 | 0 | 0 | 200 | 0.0103 | 456.46 | 0.0002359 |
| 101 | 41 | Butyl mercaptan | C-{4} H-{10} S | 109-79-5 | 90.1872 | -10.807 | 966.74 | -0.014851 | 0 | 0 | 157.46 | 0.008716 | 373.15 | 0.0002475 |
| 101 | 42 | sec-Butyl mercaptan | C-{4} H-{10} S | 513-53-1 | 90.1872 | -10.903 | 932.82 | 0.023034 | 0 | 0 | 133.02 | 0.02287 | 358.13 | 0.0002851 |
| 101 | 43 | 1-Butyne | C-{4} H-{6} | 107-00-6 | 54.09044 | -3.4644 | 334.5 | -1.0811 | 0 | 0 | 147.43 | 0.001369 | 373.15 | 0.0001271 |
| 101 | 44 | Butyraldehyde | C-{4} H-{8} O | 123-72-8 | 72.10572 | -6.4551 | 744.7 | -0.67524 | 0 | 0 | 176.8 | 0.003223 | 347.94 | 0.000257 |
| 101 | 45 | Butyric acid | C-{4} H-{8} O-{2} | 107-92-6 | 88.1051 | -9.817 | 1388 | -0.238 | 0 | 0 | 267.95 | 0.002561 | 436.42 | 0.0003087 |
| 101 | 46 | Butyronitrile | C-{4} H-{7} N | 109-74-0 | 69.1051 | -11.13 | 1084.1 | 0 | 0 | 0 | 161.3 | 0.01217 | 390.74 | 0.0002351 |
| 101 | 47 | Carbon dioxide | CO-{2} | 124-38-9 | 44.0095 | 18.775 | -402.92 | -4.6854 | -6.92E-26 | 10 | 216.58 | 0.0002488 | 303.15 | 0.00005652 |
| 101 | 48 | Carbon disulfide | CS-{2} | 75-15-0 | 76.1407 | -10.306 | 703.01 | 0 | 0 | 0 | 161.58 | 0.002592 | 441.6 | 0.0001643 |
| 101 | 49 | Carbon monoxide | CO | 630-08-0 | 28.0101 | -4.9735 | 97.67 | -1.1088 | 0 | 0 | 68.15 | 0.0002688 | 131.37 | 0.00006515 |
| 101 | 50 | Carbon tetrachloride | CCl-{4} | 56-23-5 | 153.8227 | -8.0738 | 1121.1 | -0.4726 | 0 | 0 | 250 | 0.002032 | 455 | 0.000203 |
| 101 | 51 | Carbon tetrafluoride | CF-{4} | 75-73-0 | 88.0043 | -9.9212 | 300.5 | 0 | 0 | 0 | 89.56 | 0.001408 | 145.1 | 0.0003897 |
| 101 | 52 | Chlorine | Cl-{2} | 7782-50-5 | 70.906 | -9.5412 | 456.62 | 0 | 0 | 0 | 172.12 | 0.00102 | 333.72 | 0.0002822 |
| 101 | 53 | Chlorobenzene | C-{6} H-{5} Cl | 108-90-7 | 112.5569 | 0.15772 | 540.5 | -1.6075 | 0 | 0 | 250 | 0.001422 | 540 | 0.0001291 |
| 101 | 54 | Chloroethane | C-{2} H-{5} Cl | 75-00-3 | 64.5141 | 10.9222 | -118.895 | -3.305 | 0 | 0 | 136.75 | 0.002026 | 423.15 | 0.00008727 |
| 101 | 55 | Chloroform | CHCl-{3} | 67-66-3 | 119.37764 | -14.109 | 1049.2 | 0.5377 | 0 | 0 | 209.63 | 0.00197 | 353.2 | 0.000341 |
| 101 | 56 | Chloromethane | CH-{3} Cl | 74-87-3 | 50.4875 | 10.39 | -134.38 | -3.262 | 0 | 0 | 175.43 | 0.0007234 | 416.25 | 0.00006726 |
| 101 | 57 | 1-Chloropropane | C-{3} H-{7} Cl | 540-54-5 | 78.54068 | 10.27183 | -67.2235 | -3.1664 | 0 | 0 | 150.35 | 0.002362 | 423.15 | 0.000119 |
| 101 | 58 | 2-Chloropropane | C-{3} H-{7} Cl | 75-29-6 | 78.54068 | -15.458 | 1086 | 0.654 | 0 | 0 | 250 | 0.0005514 | 308.85 | 0.0002767 |
| 101 | 59 | m-Cresol | C-{7} H-{8} O | 108-39-4 | 108.13782 | -914.12 | 38,855 | 139.11 | -0.00014757 | 2 | 273.15 | 0.08438 | 564.68 | 0.00001793 |
| 101 | 60 | o-Cresol | C-{7} H-{8} O | 95-48-7 | 108.13782 | -377.23 | 17,909 | 55.565 | -0.00004841 | 2 | 293.15 | 0.009548 | 558.04 | 0.0001514 |
| 101 | 61 | p-Cresol | C-{7} H-{8} O | 106-44-5 | 108.13782 | -851.12 | 36,686 | 129.13 | -0.00013329 | 2 | 273.15 | 0.09674 | 563.72 | 0.00002992 |
| 101 | 62 | Cumene | C-{9} H-{12} | 98-82-8 | 120.19158 | -24.988 | 1807.9 | 2.0556 | 0 | 0 | 200 | 0.006363 | 400 | 0.0002881 |
| 101 | 63 | Cyanogen | C-{2} N-{2} | 460-19-5 | 52.0348 | -11.794 | 992.33 | 0 | 0 | 0 | 245.25 | 0.0004317 | 320.12 | 0.0001676 |
| 101 | 64 | Cyclobutane | C-{4} H-{8} | 287-23-0 | 56.10632 | -3.4968 | 397.94 | -1.1087 | 0 | 0 | 182.48 | 0.0008345 | 367.94 | 0.0001278 |
| 101 | 65 | Cyclohexane | C-{6} H-{12} | 110-82-7 | 84.15948 | -33.763 | 2497.2 | 3.2236 | 0 | 0 | 279.69 | 0.001264 | 443.04 | 0.000207 |
| 101 | 66 | Cyclohexanol | C-{6} H-{12} O | 108-93-0 | 100.15888 | 280.87 | -31,869 | -38.837 | 3,994,500 | -2.002 | 296.6 | 0.06328 | 520.08 | 0.0001652 |
| 101 | 67 | Cyclohexanone | C-{6} H-{10} O | 108-94-1 | 98.143 | -44.877 | 3227.7 | 4.887 | 0 | 0 | 242 | 0.00896 | 428.58 | 0.0004402 |
| 101 | 68 | Cyclohexene | C-{6} H-{10} | 110-83-8 | 82.1436 | -11.641 | 1154.3 | 0.066511 | 0 | 0 | 200 | 0.004017 | 373.15 | 0.0002877 |
| 101 | 69 | Cyclopentane | C-{5} H-{10} | 287-92-3 | 70.1329 | -3.2612 | 614.16 | -1.156 | 0 | 0 | 225 | 0.001122 | 325 | 0.0003167 |
| 101 | 70 | Cyclopentene | C-{5} H-{8} | 142-29-0 | 68.11702 | -4.1508 | 599.77 | -1.0308 | 0 | 0 | 138.13 | 0.007531 | 405.6 | 0.0001416 |
| 101 | 71 | Cyclopropane | C-{3} H-{6} | 75-19-4 | 42.07974 | -3.524 | 342.54 | -1.1599 | 0 | 0 | 145.59 | 0.0009601 | 318.4 | 0.000108 |
| 101 | 72 | Cyclohexyl mercaptan | C-{6} H-{12} S | 1569-69-3 | 116.22448 | -11.338 | 1304.1 | 0.000092396 | 0 | 0 | 189.64 | 0.01155 | 431.95 | 0.000244 |
| 101 | 73 | Decanal | C-{10} H-{20} O | 112-31-2 | 156.2652 | 4.1184 | 629.98 | -2.2076 | 0 | 0 | 285 | 0.002134 | 481.65 | 0.0002718 |
| 101 | 74 | Decane | C-{10} H-{22} | 124-18-5 | 142.28168 | -97.663 | 4342.7 | 13.645 | -0.000019319 | 2 | 240.05 | 0.002741 | 494.16 | 0.0001292 |
| 101 | 75 | Decanoic acid | C-{10} H-{20} O-{2} | 334-48-5 | 172.265 | -12.305 | 2324.1 | -0.055494 | 0 | 0 | 304.55 | 0.006798 | 543.15 | 0.0002304 |
| 101 | 76 | 1-Decanol | C-{10} H-{22} O | 112-30-1 | 158.28108 | -69.985 | 5818.8 | 8.0715 | 0 | 0 | 285 | 0.01937 | 503 | 0.0002727 |
| 101 | 77 | 1-Decene | C-{10} H-{20} | 872-05-9 | 140.2658 | -15.868 | 1434.8 | 0.68071 | 0 | 0 | 206.89 | 0.004975 | 443.75 | 0.0002064 |
| 101 | 78 | Decyl mercaptan | C-{10} H-{22} S | 143-10-2 | 174.34668 | -11.464 | 1510.1 | -0.012754 | 0 | 0 | 247.56 | 0.004364 | 512.35 | 0.0001848 |
| 101 | 79 | 1-Decyne | C-{10} H-{18} | 764-93-2 | 138.24992 | -2.3633 | 791.93 | -1.2272 | 0 | 0 | 229.15 | 0.003786 | 505.6 | 0.0002167 |
| 100 | 80 | Deuterium | D-{2} | 7782-39-0 | 4.0316 | 0.000001348 | 0 | 0 | 0 | 0 | 20.35 | 0.000001348 | 20.35 | 0.000001348 |
| 101 | 81 | 1,1-Dibromoethane | C-{2} H-{4} Br-{2} | 557-91-5 | 187.86116 | -10.457 | 1101.1 | -0.0031354 | 0 | 0 | 210.15 | 0.005331 | 381.15 | 0.0005071 |
| 101 | 82 | 1,2-Dibromoethane | C-{2} H-{4} Br-{2} | 106-93-4 | 187.86116 | -17.582 | 1635.4 | 0.9932 | 0 | 0 | 282.85 | 0.002042 | 404.51 | 0.000512 |
| 101 | 83 | Dibromomethane | CH-{2} Br-{2} | 74-95-3 | 173.83458 | -10.013 | 921.31 | 0 | 0 | 0 | 220.6 | 0.002919 | 488.8 | 0.0002951 |
| 101 | 84 | Dibutyl ether | C-{8} H-{18} O | 142-96-1 | 130.22792 | 10.027 | 206 | -3.1607 | 0 | 0 | 175.3 | 0.005931 | 414.15 | 0.0001989 |
| 101 | 85 | m-Dichlorobenzene | C-{6} H-{4} Cl-{2} | 541-73-1 | 147.00196 | -114.7 | 4905.4 | 16.358 | -0.000020577 | 2 | 248.39 | 0.002463 | 547.16 | 0.0001565 |
| 101 | 86 | o-Dichlorobenzene | C-{6} H-{4} Cl-{2} | 95-50-1 | 147.00196 | -30.6 | 2153.4 | 2.9371 | 0 | 0 | 256.15 | 0.002726 | 453.57 | 0.0003761 |
| 101 | 87 | p-Dichlorobenzene | C-{6} H-{4} Cl-{2} | 106-46-7 | 147.00196 | 31.63 | -1080 | -6.114 | 0 | 0 | 326.14 | 0.0008543 | 447.21 | 0.0003039 |
| 101 | 88 | 1,1-Dichloroethane | C-{2} H-{4} Cl-{2} | 75-34-3 | 98.95916 | -8.991 | 870.2 | -0.2805 | 0 | 0 | 176.19 | 0.004076 | 330.45 | 0.0003407 |
| 101 | 89 | 1,2-Dichloroethane | C-{2} H-{4} Cl-{2} | 107-06-2 | 98.95916 | 15.312 | -41.12 | -3.919 | 0 | 0 | 237.49 | 0.001839 | 400 | 0.0002557 |
| 101 | 90 | Dichloromethane | CH-{2} Cl-{2} | 75-09-2 | 84.93258 | -13.071 | 940.03 | 0.3733 | 0 | 0 | 208.38 | 0.001406 | 373.93 | 0.0002374 |
| 101 | 91 | 1,1-Dichloropropane | C-{3} H-{6} Cl-{2} | 78-99-9 | 112.98574 | -10.872 | 1033.1 | -0.0006744 | 0 | 0 | 192.5 | 0.004051 | 361.25 | 0.0003301 |
| 101 | 92 | 1,2-Dichloropropane | C-{3} H-{6} Cl-{2} | 78-87-5 | 112.98574 | -11.269 | 1195.3 | 0.012736 | 0 | 0 | 172.71 | 0.01381 | 369.52 | 0.0003495 |
| 101 | 93 | Diethanol amine | C-{4} H-{11} NO-{2} | 111-42-2 | 105.13564 | -375.21 | 17,177 | 66.66 | -3.6367 | 0.5 | 293.15 | 0.8128 | 589.28 | 0.000109 |
| 101 | 94 | Diethyl amine | C-{4} H-{11} N | 109-89-7 | 73.13684 | -17.57 | 1385.7 | 0.85647 | 0 | 0 | 223.35 | 0.00119 | 329.1 | 0.000226 |
| 101 | 95 | Diethyl ether | C-{4} H-{10} O | 60-29-7 | 74.1216 | 10.197 | -63.8 | -3.226 | 0 | 0 | 200 | 0.0007359 | 373.15 | 0.0001141 |
| 101 | 96 | Diethyl sulfide | C-{4} H-{10} S | 352-93-2 | 90.1872 | -5.135 | 667.5 | -0.8553 | 0 | 0 | 225 | 0.001113 | 365.25 | 0.0002354 |
| 101 | 97 | 1,1-Difluoroethane | C-{2} H-{4} F-{2} | 75-37-6 | 66.04997 | 10.501 | -52.181 | -3.3459 | 0 | 0 | 154.56 | 0.001229 | 343.15 | 0.0001026 |
| 101 | 98 | 1,2-Difluoroethane | C-{2} H-{4} F-{2} | 624-72-6 | 66.04997 | -10.072 | 710.48 | -0.14677 | 0 | 0 | 179.6 | 0.00103 | 283.65 | 0.0002257 |
| 101 | 99 | Difluoromethane | CH-{2} F-{2} | 75-10-5 | 52.02339 | -17.723 | 850.2 | 1.0601 | -1.17E-18 | 7 | 137 | 0.001832 | 343.15 | 0.0000605 |
| 101 | 100 | Diisopropyl amine | C-{6} H-{15} N | 108-18-9 | 101.19 | -1.7366 | 599.8 | -1.4237 | 0 | 0 | 250 | 0.0007479 | 357.05 | 0.0002193 |
| 101 | 101 | Diisopropyl ether | C-{6} H-{14} O | 108-20-3 | 102.17476 | -11.5 | 993 | 0.022 | 0 | 0 | 187.65 | 0.002258 | 341.45 | 0.000211 |
| 101 | 102 | Diisopropyl ketone | C-{7} H-{14} O | 565-80-0 | 114.18546 | -15.097 | 1426.9 | 0.51512 | 0 | 0 | 204.81 | 0.004569 | 397.55 | 0.0002194 |
| 101 | 103 | 1,1-Dimethoxyethane | C-{4} H-{10} O-{2} | 534-15-6 | 90.121 | -10.968 | 885.49 | 0 | 0 | 0 | 159.95 | 0.004375 | 337.45 | 0.0002378 |
| 101 | 104 | 1,2-Dimethoxypropane | C-{5} H-{12} O-{2} | 7778-85-0 | 104.14758 | -10.631 | 1086.4 | 0 | 0 | 0 | 226.1 | 0.00295 | 366.15 | 0.0004695 |
| 101 | 105 | Dimethyl acetylene | C-{4} H-{6} | 503-17-3 | 54.09044 | 0.10842 | 300.2 | -1.6831 | 0 | 0 | 240.91 | 0.0003796 | 371 | 0.0001186 |
| 101 | 106 | Dimethyl amine | C-{2} H-{7} N | 124-40-3 | 45.08368 | -10.93 | 699.5 | 0 | 0 | 0 | 200 | 0.0005917 | 308.15 | 0.0001734 |
| 101 | 107 | 2,3-Dimethylbutane | C-{6} H-{14} | 79-29-8 | 86.17536 | 7.2565 | 221.4 | -2.7946 | 0 | 0 | 220 | 0.001103 | 331.13 | 0.0002509 |
| 101 | 108 | 1,1-Dimethylcyclohexane | C-{8} H-{16} | 590-66-9 | 112.21264 | -10.716 | 1140.5 | -0.047736 | 0 | 0 | 239.66 | 0.001992 | 392.7 | 0.0003045 |
| 101 | 109 | cis-1,2-Dimethylcyclohexane | C-{8} H-{16} | 2207-01-4 | 112.21264 | -11.796 | 1463.5 | 0 | 0 | 0 | 223.16 | 0.005311 | 484.92 | 0.0001541 |
| 101 | 110 | trans-1,2-Dimethylcyclohexane | C-{8} H-{16} | 6876-23-9 | 112.21264 | -11.344 | 1168.9 | 0.04513 | 0 | 0 | 184.99 | 0.008315 | 396.58 | 0.0002956 |
| 101 | 111 | Dimethyl disulfide | C-{2} H-{6} S-{2} | 624-92-0 | 94.19904 | -10.577 | 1172.6 | -0.14244 | 0 | 0 | 188.44 | 0.006093 | 382.9 | 0.0002336 |
| 101 | 112 | Dimethyl ether | C-{2} H-{6} O | 115-10-6 | 46.06844 | -10.62 | 448.99 | 0.000083967 | 0 | 0 | 131.65 | 0.0007398 | 248.31 | 0.000149 |
| 101 | 113 | N,N-Dimethyl formamide | C-{3} H-{7} NO | 68-12-2 | 73.09378 | -20.425 | 1515.5 | 1.4444 | 0 | 0 | 240 | 0.002041 | 425.15 | 0.0002981 |
| 101 | 114 | 2,3-Dimethylpentane | C-{7} H-{16} | 565-59-3 | 100.20194 | -12.08 | 1112.2 | 0.09654 | 0 | 0 | 160 | 0.009669 | 362.93 | 0.0002147 |
| 101 | 115 | Dimethyl phthalate | C-{10} H-{10} O-{4} | 131-11-3 | 194.184 | 152.9 | -10,183 | -22.709 | 50,373,000,000 | 0 | 274.18 | 0.06023 | 612.8 | 0.0001109 |
| 0 | 116 | Dimethylsilane | C-{2} H-{8} Si | 1111-74-6 | 60.17042 | 0 | 0 | 0 | 0 | 0 | 0 | 0 | 0 | 0 |
| 101 | 117 | Dimethyl sulfide | C-{2} H-{6} S | 75-18-3 | 62.134 | -17.641 | 1067.5 | 1.0317 | 0 | 0 | 225 | 0.0006696 | 310.48 | 0.0002528 |
| 101 | 118 | Dimethyl sulfoxide | C-{2} H-{6} OS | 67-68-5 | 78.13344 | -37.347 | 2835 | 3.7937 | 0 | 0 | 291.67 | 0.002253 | 464 | 0.0003547 |
| 101 | 119 | Dimethyl terephthalate | C-{10} H-{10} O-{4} | 120-61-6 | 194.184 | -16.0542 | 2221.79 | 0.63829 | 0 | 0 | 413.79 | 0.001071 | 559.2 | 0.0003214 |
| 101 | 120 | 1,4-Dioxane | C-{4} H-{8} O-{2} | 123-91-1 | 88.10512 | -46.166 | 3086.2 | 5.104 | 0 | 0 | 284.95 | 0.001525 | 374.65 | 0.000461 |
| 101 | 121 | Diphenyl ether | C-{12} H-{10} O | 101-84-8 | 170.2072 | -12.373 | 2017.5 | 0 | 0 | 0 | 293.15 | 0.004124 | 613.44 | 0.0001134 |
| 101 | 122 | Dipropyl amine | C-{6} H-{15} N | 142-84-7 | 101.19 | -15.404 | 1390 | 0.5564 | 0 | 0 | 260 | 0.0009454 | 382.35 | 0.0002118 |
| 101 | 123 | Dodecane | C-{12} H-{26} | 112-40-3 | 170.33484 | -134.91 | 6054.2 | 19.337 | -0.00002443 | 2 | 262.15 | 0.003002 | 526.4 | 0.000122 |
| 101 | 124 | Eicosane | C-{20} H-{42} | 112-95-8 | 282.54748 | -18.315 | 2283.5 | 0.95485 | 0 | 0 | 309.58 | 0.004242 | 616.93 | 0.0002078 |
| 101 | 125 | Ethane | C-{2} H-{6} | 74-84-0 | 30.069 | -7.0046 | 276.38 | -0.6087 | -3.11E-18 | 7 | 90.35 | 0.001247 | 300 | 0.00003587 |
| 101 | 126 | Ethanol | C-{2} H-{6} O | 64-17-5 | 46.06844 | 7.875 | 781.98 | -3.0418 | 0 | 0 | 200 | 0.01315 | 440 | 0.0001416 |
| 101 | 127 | Ethyl acetate | C-{4} H-{8} O-{2} | 141-78-6 | 88.10512 | 14.354 | -154.6 | -3.7887 | 0 | 0 | 220 | 0.001132 | 473.15 | 0.00009061 |
| 101 | 128 | Ethyl amine | C-{2} H-{7} N | 75-04-7 | 45.08368 | 19.822 | -0.12598 | -4.9793 | 0 | 0 | 192.15 | 0.001727 | 289.73 | 0.0002236 |
| 101 | 129 | Ethylbenzene | C-{8} H-{10} | 100-41-4 | 106.165 | -13.563 | 1208.6 | 0.377 | 0 | 0 | 178.2 | 0.008012 | 413.1 | 0.0002326 |
| 101 | 130 | Ethyl benzoate | C-{9} H-{10} O-{2} | 93-89-0 | 150.1745 | -40.706 | 3035 | 4.2655 | 0 | 0 | 250 | 0.006643 | 486.55 | 0.0003109 |
| 101 | 131 | 2-Ethyl butanoic acid | C-{6} H-{12} O-{2} | 88-09-5 | 116.15828 | -12.24 | 1836.4 | 0.021868 | 0 | 0 | 258.15 | 0.006705 | 466.95 | 0.0002822 |
| 101 | 132 | Ethyl butyrate | C-{6} H-{12} O-{2} | 105-54-4 | 116.15828 | -15.485 | 1325.6 | 0.6432 | 0 | 0 | 250 | 0.001319 | 394.65 | 0.0002533 |
| 101 | 133 | Ethylcyclohexane | C-{8} H-{16} | 1678-91-7 | 112.21264 | -22.11 | 1673 | 1.641 | 0 | 0 | 200 | 0.006406 | 404.94 | 0.0002956 |
| 101 | 134 | Ethylcyclopentane | C-{7} H-{14} | 1640-89-7 | 98.18606 | -6.894 | 818.6 | -0.5941 | 0 | 0 | 253.15 | 0.0009605 | 378.15 | 0.0002599 |
| 101 | 135 | Ethylene | C-{2} H-{4} | 74-85-1 | 28.05316 | 1.8878 | 78.865 | -2.1554 | 0 | 0 | 104 | 0.0006334 | 250 | 0.00006142 |
| 101 | 136 | Ethylenediamine | C-{2} H-{8} N-{2} | 107-15-3 | 60.09832 | -53.908 | 4030.8 | 5.9704 | 0 | 0 | 284.29 | 0.002487 | 483.15 | 0.0001723 |
| 101 | 137 | Ethylene glycol | C-{2} H-{6} O-{2} | 107-21-1 | 62.06784 | -290.36 | 14,251 | 42.486 | -0.000040369 | 2 | 260.15 | 0.1305 | 576 | 0.0001276 |
| 101 | 138 | Ethyleneimine | C-{2} H-{5} N | 151-56-4 | 43.0678 | -11.012 | 967.4 | 0 | 0 | 0 | 250 | 0.0007909 | 329 | 0.0003123 |
| 101 | 139 | Ethylene oxide | C-{2} H-{4} O | 75-21-8 | 44.05256 | -8.521 | 634.2 | -0.3314 | 0 | 0 | 160.65 | 0.001918 | 283.85 | 0.0002863 |
| 101 | 140 | Ethyl formate | C-{3} H-{6} O-{2} | 109-94-4 | 74.07854 | -9.8417 | 876.4 | -0.1708 | 0 | 0 | 245 | 0.0007435 | 345 | 0.0002486 |
| 101 | 141 | 2-Ethyl hexanoic acid | C-{8} H-{16} O-{2} | 149-57-5 | 144.211 | -13.037 | 2346 | 0 | 0 | 0 | 155.15 | 8.035 | 510.1 | 0.0002165 |
| 101 | 142 | Ethylhexyl ether | C-{8} H-{18} O | 5756-43-4 | 130.22792 | -11.311 | 1337.2 | -0.02982 | 0 | 0 | 180 | 0.01765 | 417.15 | 0.0002522 |
| 101 | 143 | Ethylisopropyl ether | C-{5} H-{12} O | 625-54-7 | 88.14818 | -11.331 | 908.46 | 0.00042478 | 0 | 0 | 140 | 0.007908 | 326.15 | 0.0001949 |
| 101 | 144 | Ethylisopropyl ketone | C-{6} H-{12} O | 565-69-5 | 100.15888 | -11.452 | 1172.7 | -0.000101 | 0 | 0 | 204.15 | 0.003319 | 386.55 | 0.0002207 |
| 101 | 145 | Ethyl mercaptan | C-{2} H-{6} S | 75-08-1 | 62.13404 | -9.7574 | 729.43 | -0.14912 | 0 | 0 | 125.26 | 0.00952 | 308.15 | 0.0002626 |
| 101 | 146 | Ethyl propionate | C-{5} H-{10} O-{2} | 105-37-3 | 102.1317 | -8.9215 | 950.8 | -0.32687 | 0 | 0 | 250 | 0.0009848 | 372.25 | 0.000248 |
| 101 | 147 | Ethylpropyl ether | C-{5} H-{12} O | 628-32-0 | 88.14818 | 0.7109 | 386.51 | -1.7754 | 0 | 0 | 200 | 0.001156 | 337.01 | 0.0002086 |
| 101 | 148 | Ethyltrichlorosilane | C-{2} H-{5} Cl-{3} Si | 115-21-9 | 163.506 | -11.499 | 1122.6 | 0 | 0 | 0 | 167.55 | 0.008239 | 371.05 | 0.0002089 |
| 101 | 149 | Fluorine | F-{2} | 7782-41-4 | 37.996806 | 8.18 | -75.6 | -3.5148 | 0 | 0 | 53.48 | 0.0007317 | 140 | 0.00005954 |
| 101 | 150 | Fluorobenzene | C-{6} H-{5} F | 462-06-6 | 96.102303 | -10.064 | 1058.7 | -0.17162 | 0 | 0 | 232.15 | 0.001599 | 453.15 | 0.0001542 |
| 101 | 151 | Fluoroethane | C-{2} H-{5} F | 353-36-6 | 48.0595 | -10.118 | 464.42 | 0 | 0 | 0 | 129.95 | 0.001438 | 235.45 | 0.00029 |
| 101 | 152 | Fluoromethane | CH-{3} F | 593-53-3 | 34.03292 | -10.501 | 427.78 | 0.0086309 | 0 | 0 | 131.35 | 0.000745 | 194.82 | 0.0002587 |
| 101 | 153 | Formaldehyde | CH-{2} O | 50-00-0 | 30.02598 | -7.6591 | 603.36 | -0.53378 | 0 | 0 | 155.15 | 0.00156 | 253.85 | 0.0002645 |
| 101 | 154 | Formamide | CH-{3} NO | 75-12-7 | 45.04062 | -74.521 | 5081.5 | 9.0873 | 0 | 0 | 273.15 | 0.007171 | 493 | 0.0003829 |
| 101 | 155 | Formic acid | CH-{2} O-{2} | 64-18-6 | 46.0257 | -48.529 | 3394.7 | 5.3903 | 0 | 0 | 281.45 | 0.002319 | 373.71 | 0.0005444 |
| 101 | 156 | Furan | C-{4} H-{4} O | 110-00-9 | 68.07396 | -10.923 | 894.63 | -0.0006842 | 0 | 0 | 200 | 0.001575 | 304.5 | 0.0003392 |
| 101 | 157 | Helium-4 | He | 7440-59-7 | 4.0026 | -9.6312 | -3.841 | -1.458 | -1.07E-08 | 10 | 2.2 | 0.000003628 | 5.1 | 0.000002532 |
| 101 | 158 | Heptadecane | C-{17} H-{36} | 629-78-7 | 240.46774 | -19.991 | 2245.1 | 1.1982 | 0 | 0 | 295.13 | 0.003814 | 575.3 | 0.0002088 |
| 101 | 159 | Heptanal | C-{7} H-{14} O | 111-71-7 | 114.18546 | -9.5468 | 1147.2 | -0.23251 | 0 | 0 | 229.8 | 0.002971 | 426.15 | 0.000258 |
| 101 | 160 | Heptane | C-{7} H-{16} | 142-82-5 | 100.20194 | -98.159 | 3592.6 | 14.197 | -0.000029555 | 2 | 180.15 | 0.004341 | 432.16 | 0.0001003 |
| 101 | 161 | Heptanoic acid | C-{7} H-{14} O-{2} | 111-14-8 | 130.185 | -40.543 | 3328.3 | 4.1804 | 0 | 0 | 265.83 | 0.009242 | 496.15 | 0.0003754 |
| 101 | 162 | 1-Heptanol | C-{7} H-{16} O | 111-70-6 | 116.20134 | -66.654 | 5325.8 | 7.66 | -2.25E-28 | 9.9041 | 239.15 | 0.08805 | 448.6 | 0.000319 |
| 101 | 163 | 2-Heptanol | C-{7} H-{16} O | 543-49-7 | 116.20134 | -125.81 | 7996 | 16.412 | -7.66E-17 | 6 | 220 | 0.3856 | 432.9 | 0.0002707 |
| 101 | 164 | 3-Heptanone | C-{7} H-{14} O | 106-35-4 | 114.18546 | -9.3874 | 1204.9 | -0.32618 | 0 | 0 | 234.15 | 0.002427 | 421.15 | 0.000204 |
| 101 | 165 | 2-Heptanone | C-{7} H-{14} O | 110-43-0 | 114.18546 | -13.929 | 1321.9 | 0.40382 | 0 | 0 | 250 | 0.001642 | 424.18 | 0.0002318 |
| 101 | 166 | 1-Heptene | C-{7} H-{14} | 592-76-7 | 98.18606 | -10.819 | 841.33 | 0 | 0 | 0 | 154.12 | 0.004701 | 429.92 | 0.0001417 |
| 101 | 167 | Heptyl mercaptan | C-{7} H-{16} S | 1639-09-4 | 132.26694 | -11.812 | 1291.9 | 0.076469 | 0 | 0 | 229.92 | 0.003097 | 450.09 | 0.0002087 |
| 101 | 168 | 1-Heptyne | C-{7} H-{12} | 628-71-7 | 96.17018 | -2.7947 | 563.86 | -1.1636 | 0 | 0 | 192.22 | 0.002528 | 447.2 | 0.0001777 |
| 101 | 169 | Hexadecane | C-{16} H-{34} | 544-76-3 | 226.44116 | -20.182 | 2203.5 | 1.2289 | 0 | 0 | 291.31 | 0.003536 | 564.15 | 0.0002054 |
| 101 | 170 | Hexanal | C-{6} H-{12} O | 66-25-1 | 100.15888 | 0.1369 | 633.77 | -1.6659 | 0 | 0 | 214.93 | 0.002849 | 401.15 | 0.0002563 |
| 101 | 171 | Hexane | C-{6} H-{14} | 110-54-3 | 86.17536 | -56.569 | 2140.5 | 7.5175 | -0.000017676 | 2 | 174.65 | 0.002379 | 406.08 | 0.0001164 |
| 101 | 172 | Hexanoic acid | C-{6} H-{12} O-{2} | 142-62-1 | 116.158 | -46.402 | 3448.6 | 5.0849 | 0 | 0 | 269.25 | 0.005854 | 478.85 | 0.0004019 |
| 101 | 173 | 1-Hexanol | C-{6} H-{14} O | 111-27-3 | 102.17476 | -39.324 | 3841 | 3.6933 | -2.12E-30 | 10.485 | 228.55 | 0.0857 | 429.9 | 0.0003343 |
| 101 | 174 | 2-Hexanol | C-{6} H-{14} O | 626-93-7 | 102.175 | -82.705 | 7404.9 | 6.4721 | 1.5016 | 0.41014 | 223 | 0.4919 | 412.4 | 0.0003274 |
| 101 | 175 | 2-Hexanone | C-{6} H-{12} O | 591-78-6 | 100.15888 | -11.445 | 1187.2 | 0.0029076 | 0 | 0 | 217.35 | 0.002561 | 400.7 | 0.0002108 |
| 101 | 176 | 3-Hexanone | C-{6} H-{12} O | 589-38-8 | 100.15888 | -13.684 | 1283.4 | 0.33755 | 0 | 0 | 217.5 | 0.002563 | 396.65 | 0.0002185 |
| 101 | 177 | 1-Hexene | C-{6} H-{12} | 592-41-6 | 84.15948 | -10.903 | 796.19 | 0 | 0 | 0 | 133.39 | 0.007197 | 336.63 | 0.0001959 |
| 101 | 178 | 3-Hexyne | C-{6} H-{10} | 928-49-4 | 82.1436 | -4.2684 | 647.6 | -1.0087 | 0 | 0 | 170.05 | 0.00355 | 432 | 0.0001377 |
| 101 | 179 | Hexyl mercaptan | C-{6} H-{14} S | 111-31-9 | 118.24036 | -10.073 | 1123.3 | -0.16515 | 0 | 0 | 192.62 | 0.006035 | 425.81 | 0.0002172 |
| 101 | 180 | 1-Hexyne | C-{6} H-{10} | 693-02-7 | 82.1436 | -4.7263 | 594.43 | -0.86247 | 0 | 0 | 141.25 | 0.008332 | 412 | 0.0002083 |
| 101 | 181 | 2-Hexyne | C-{6} H-{10} | 764-35-2 | 82.1436 | -3.7464 | 624.2 | -1.084 | 0 | 0 | 183.65 | 0.002483 | 435 | 0.0001368 |
| 101 | 182 | Hydrazine | H-{4} N-{2} | 302-01-2 | 32.04516 | -75.781 | 4175.4 | 9.6508 | -7.27E-09 | 3 | 274.69 | 0.001451 | 522.52 | 0.0002191 |
| 101 | 183 | Hydrogen | H-{2} | 1333-74-0 | 2.01588 | -11.661 | 24.7 | -0.261 | -4.10E-16 | 10 | 13.95 | 0.00002546 | 33 | 0.000003906 |
| 101 | 184 | Hydrogen bromide | BrH | 10035-10-6 | 80.91194 | -11.633 | 316.38 | 0.56191 | 0 | 0 | 185.15 | 0.0009207 | 206.45 | 0.0008206 |
| 101 | 185 | Hydrogen chloride | ClH | 7647-01-0 | 36.46094 | -116.34 | 3834.6 | 16.864 | -2.59E-10 | 4 | 158.97 | 0.001003 | 318.15 | 0.00005777 |
| 101 | 186 | Hydrogen cyanide | CHN | 74-90-8 | 27.02534 | -21.927 | 1266.5 | 1.5927 | 0 | 0 | 259.83 | 0.0002754 | 298.85 | 0.0001821 |
| 101 | 187 | Hydrogen fluoride | FH | 7664-39-3 | 20.006343 | 353.99 | 13,928 | -41.717 | -2962 | -0.5 | 189.79 | 0.001545 | 368.92 | 0.0001185 |
| 101 | 188 | Hydrogen sulfide | H-{2} S | 7783-06-4 | 34.08088 | -10.905 | 762.11 | -0.11863 | 0 | 0 | 187.68 | 0.0005726 | 350 | 0.00008089 |
| 101 | 189 | Isobutyric acid | C-{4} H-{8} O-{2} | 79-31-2 | 88.10512 | -11.497 | 1365.7 | 0.036966 | 0 | 0 | 250 | 0.002938 | 450 | 0.0002649 |
| 101 | 190 | Isopropyl amine | C-{3} H-{9} N | 75-31-0 | 59.11026 | -31.157 | 1926 | 2.925 | 0 | 0 | 250 | 0.0006737 | 453.15 | 0.0001214 |
| 101 | 191 | Malonic acid | C-{3} H-{4} O-{4} | 141-82-2 | 104.06146 | -117.73 | 9943.3 | 14.589 | 0 | 0 | 409.15 | 0.003386 | 580 | 0.0004281 |
| 101 | 192 | Methacrylic acid | C-{4} H-{6} O-{2} | 79-41-4 | 86.08924 | -14.527 | 1497.7 | 0.51747 | 0 | 0 | 288.15 | 0.001664 | 434.15 | 0.0003582 |
| 101 | 193 | Methane | CH-{4} | 74-82-8 | 16.0425 | -6.1572 | 178.15 | -0.95239 | -9.06E-24 | 10 | 90.69 | 0.0002063 | 188 | 0.00002262 |
| 101 | 194 | Methanol | CH-{4} O | 67-56-1 | 32.04186 | -25.317 | 1789.2 | 2.069 | 0 | 0 | 175.47 | 0.01193 | 337.85 | 0.0003442 |
| 101 | 195 | N-Methyl acetamide | C-{3} H-{7} NO | 79-16-3 | 73.09378 | -4.648 | 1832 | -1.2191 | 0 | 0 | 301.15 | 0.003995 | 478.15 | 0.0002392 |
| 101 | 196 | Methyl acetate | C-{3} H-{6} O-{2} | 79-20-9 | 74.07854 | 13.557 | -187.3 | -3.6592 | 0 | 0 | 250 | 0.0006135 | 425 | 0.0001198 |
| 101 | 197 | Methyl acetylene | C-{3} H-{4} | 74-99-7 | 40.06386 | -2.8737 | 301.35 | -1.2271 | 0 | 0 | 170.45 | 0.0006045 | 373.15 | 0.00008846 |
| 101 | 198 | Methyl acrylate | C-{4} H-{6} O-{2} | 96-33-3 | 86.08924 | 10.848 | 75 | -3.297 | 0 | 0 | 275 | 0.0006126 | 400 | 0.0001636 |
| 101 | 199 | Methyl amine | CH-{5} N | 74-89-5 | 31.0571 | -17.044 | 1074 | 0.84203 | 0 | 0 | 179.69 | 0.001236 | 273.15 | 0.0002275 |
| 101 | 200 | Methyl benzoate | C-{8} H-{8} O-{2} | 93-58-3 | 136.14792 | -21.971 | 2267.4 | 1.4173 | 0 | 0 | 288.15 | 0.002299 | 472.65 | 0.0002149 |
| 101 | 201 | 3-Methyl-1,2-butadiene | C-{5} H-{8} | 598-25-4 | 68.11702 | -10.481 | 648.37 | -0.041947 | 0 | 0 | 159.53 | 0.001321 | 314 | 0.0001739 |
| 101 | 202 | 2-Methylbutane | C-{5} H-{12} | 78-78-4 | 72.14878 | -12.596 | 889.11 | 0.20469 | 0 | 0 | 150 | 0.003542 | 310 | 0.0001928 |
| 101 | 203 | 2-Methylbutanoic acid | C-{5} H-{10} O-{2} | 116-53-0 | 102.1317 | -1.035 | 1048.5 | -1.5474 | 0 | 0 | 298.15 | 0.001774 | 450.15 | 0.0002859 |
| 101 | 204 | 3-Methyl-1-butanol | C-{5} H-{12} O | 123-51-3 | 88.1482 | -46.377 | 4169.6 | 4.7 | 0 | 0 | 155.95 | 59.89 | 404.15 | 0.0003891 |
| 101 | 205 | 2-Methyl-1-butene | C-{5} H-{10} | 563-46-2 | 70.1329 | -10.755 | 705.48 | -0.011113 | 0 | 0 | 135.58 | 0.003675 | 304.3 | 0.0002034 |
| 101 | 206 | 2-Methyl-2-butene | C-{5} H-{10} | 513-35-9 | 70.1329 | -8.4453 | 639.21 | -0.38409 | 0 | 0 | 139.39 | 0.003164 | 311.7 | 0.0001841 |
| 101 | 207 | 2-Methyl -1-butene-3-yne | C-{5} H-{6} | 78-80-8 | 66.10114 | -3.6585 | 441.1 | -1.0547 | 0 | 0 | 160.15 | 0.001915 | 390.15 | 0.0001476 |
| 101 | 208 | Methylbutyl ether | C-{5} H-{12} O | 628-28-4 | 88.14818 | -11.278 | 949.12 | -0.0001234 | 0 | 0 | 157.48 | 0.005239 | 343.31 | 0.0002006 |
| 101 | 209 | Methylbutyl sulfide | C-{5} H-{12} S | 628-29-5 | 104.214 | -10.97 | 1067.3 | -0.017484 | 0 | 0 | 175.3 | 0.00693 | 396.58 | 0.0002286 |
| 101 | 210 | 3-Methyl-1-butyne | C-{5} H-{8} | 598-23-2 | 68.11702 | -1.8842 | 433.58 | -1.3238 | 0 | 0 | 183.45 | 0.001628 | 364 | 0.0002035 |
| 101 | 211 | Methyl butyrate | C-{5} H-{10} O-{2} | 623-42-7 | 102.1317 | -12.206 | 1141.7 | 0.15014 | 0 | 0 | 200 | 0.003339 | 375.9 | 0.0002539 |
| 101 | 212 | Methylchlorosilane | CH-{5} ClSi | 993-00-0 | 80.5889 | -12.002 | 1009.7 | 0 | 0 | 0 | 139.05 | 0.008734 | 353.6 | 0.0001066 |
| 101 | 213 | Methylcyclohexane | C-{7} H-{14} | 108-87-2 | 98.18606 | -11.358 | 1213.1 | 0 | 0 | 0 | 146.58 | 0.04587 | 457.68 | 0.0001653 |
| 101 | 214 | 1-Methylcyclohexanol | C-{7} H-{14} O | 590-67-0 | 114.18546 | -6.1534 | 3219 | -1.4494 | 0 | 0 | 299.15 | 0.02584 | 548.8 | 0.00008025 |
| 101 | 215 | cis-2-Methylcyclohexanol | C-{7} H-{14} O | 7443-70-1 | 114.18546 | -6.6904 | 3150.5 | -1.392 | 0 | 0 | 280.15 | 0.03729 | 491.2 | 0.000136 |
| 101 | 216 | trans-2-Methylcyclohexanol | C-{7} H-{14} O | 7443-52-9 | 114.18546 | -6.6915 | 3173.2 | -1.3046 | 0 | 0 | 269.15 | 0.1107 | 493.6 | 0.0002356 |
| 101 | 217 | Methylcyclopentane | C-{6} H-{12} | 96-37-7 | 84.15948 | -1.8553 | 612.62 | -1.3774 | 0 | 0 | 248.15 | 0.0009288 | 353.15 | 0.0002742 |
| 101 | 218 | 1-Methylcyclopentene | C-{6} H-{10} | 693-89-0 | 82.1436 | -4.8515 | 679.07 | -0.93238 | 0 | 0 | 146.62 | 0.007669 | 433.6 | 0.0001301 |
| 101 | 219 | 3-Methylcyclopentene | C-{6} H-{10} | 1120-62-3 | 82.1436 | -6.7424 | 788.86 | -0.69862 | 0 | 0 | 168.54 | 0.003539 | 420.8 | 0.0001129 |
| 101 | 220 | Methyldichlorosilane | CH-{4} Cl-{2} Si | 75-54-7 | 115.03396 | -10.517 | 745.32 | 0 | 0 | 0 | 275 | 0.000407 | 314.7 | 0.0002891 |
| 101 | 221 | Methylethyl ether | C-{3} H-{8} O | 540-67-0 | 60.09502 | -11.104 | 627.18 | 0.036581 | 0 | 0 | 160 | 0.0009133 | 280.5 | 0.0001731 |
| 101 | 222 | Methylethyl ketone | C-{4} H-{8} O | 78-93-3 | 72.10572 | -1.0598 | 520.68 | -1.4961 | 0 | 0 | 186.48 | 0.002266 | 535.5 | 0.00007577 |
| 101 | 223 | Methylethyl sulfide | C-{3} H-{8} S | 624-89-5 | 76.1606 | -10.842 | 863.65 | -0.000746 | 0 | 0 | 167.23 | 0.003409 | 339.8 | 0.0002474 |
| 101 | 224 | Methyl formate | C-{2} H-{4} O-{2} | 107-31-3 | 60.05196 | -39.641 | 2113.3 | 4.308 | 0 | 0 | 250 | 0.0006104 | 304.9 | 0.0003134 |
| 101 | 225 | Methylisobutyl ether | C-{5} H-{12} O | 625-44-5 | 88.14818 | -11.27 | 888.42 | 0.024736 | 0 | 0 | 188 | 0.001637 | 331.7 | 0.0002143 |
| 101 | 226 | Methylisobutyl ketone | C-{6} H-{12} O | 108-10-1 | 100.15888 | -11.394 | 1168.7 | -0.007539 | 0 | 0 | 189.15 | 0.005222 | 389.15 | 0.000217 |
| 0 | 227 | Methyl isocyanate | C-{2} H-{3} NO | 624-83-9 | 57.05132 | 0 | 0 | 0 | 0 | 0 | 0 | 0 | 0 | 0 |
| 101 | 228 | Methylisopropyl ether | C-{4} H-{10} O | 598-53-8 | 74.1216 | -11.216 | 737.75 | 0.019308 | 0 | 0 | 127.93 | 0.004722 | 303.92 | 0.0001703 |
| 101 | 229 | Methylisopropyl ketone | C-{5} H-{10} O | 563-80-4 | 86.1323 | -11.272 | 1048.9 | 0.00030493 | 0 | 0 | 180.15 | 0.004305 | 367.55 | 0.0002212 |
| 101 | 230 | Methylisopropyl sulfide | C-{4} H-{10} S | 1551-21-9 | 90.1872 | -11.075 | 990.72 | 0 | 0 | 0 | 171.64 | 0.004977 | 553.1 | 0.00009292 |
| 101 | 231 | Methyl mercaptan | CH-{4} S | 74-93-1 | 48.10746 | -10.628 | 645 | 0.025885 | 0 | 0 | 150.18 | 0.002022 | 279.11 | 0.0002826 |
| 101 | 232 | Methyl methacrylate | C-{5} H-{8} O-{2} | 80-62-6 | 100.11582 | -0.099 | 496 | -1.5939 | 0 | 0 | 260 | 0.0008635 | 400 | 0.0002229 |
| 101 | 233 | 2-Methyloctanoic acid | C-{9} H-{18} O-{2} | 3004-93-1 | 158.23802 | -12.579 | 2224.2 | 0 | 0 | 0 | 240 | 0.03646 | 518.15 | 0.0002519 |
| 101 | 234 | 2-Methylpentane | C-{6} H-{14} | 107-83-5 | 86.17536 | -12.86 | 946.91 | 0.26191 | 0 | 0 | 119.55 | 0.02506 | 333.41 | 0.0002038 |
| 101 | 235 | Methyl pentyl ether | C-{6} H-{14} O | 628-80-8 | 102.17476 | -11.391 | 1090.8 | 1.0752E-07 | 0 | 0 | 176 | 0.005554 | 372 | 0.000212 |
| 101 | 236 | 2-Methylpropane | C-{4} H-{10} | 75-28-5 | 58.1222 | -13.912 | 797.09 | 0.45308 | 0 | 0 | 110 | 0.01072 | 310.95 | 0.0001588 |
| 101 | 237 | 2-Methyl-2-propanol | C-{4} H-{10} O | 75-65-0 | 74.1216 | 400.35 | -30,387 | -56.971 | 550,680,000 | -3 | 295.56 | 0.005334 | 451.21 | 0.0001006 |
| 101 | 238 | 2-Methyl propene | C-{4} H-{8} | 115-11-7 | 56.10632 | -10.385 | 599.59 | -0.046088 | 0 | 0 | 132.81 | 0.002253 | 266.25 | 0.000227 |
| 101 | 239 | Methyl propionate | C-{4} H-{8} O-{2} | 554-12-1 | 88.10512 | -4.841 | 696.7 | -0.9194 | 0 | 0 | 250 | 0.0008002 | 352.6 | 0.0002593 |
| 101 | 240 | Methylpropyl ether | C-{4} H-{10} O | 557-17-5 | 74.1216 | -10.705 | 788.94 | -0.048383 | 0 | 0 | 133.97 | 0.00639 | 312.2 | 0.0002127 |
| 101 | 241 | Methylpropyl sulfide | C-{4} H-{10} S | 3877-15-4 | 90.1872 | -10.569 | 952.38 | -0.063873 | 0 | 0 | 160.17 | 0.007103 | 368.69 | 0.0002333 |
| 0 | 242 | Methylsilane | CH-{6} Si | 992-94-9 | 46.14384 | 0 | 0 | 0 | 0 | 0 | 0 | 0 | 0 | 0 |
| 101 | 243 | alpha-Methyl styrene | C-{9} H-{10} | 98-83-9 | 118.1757 | -11.632 | 1251.6 | 0.071692 | 0 | 0 | 249.95 | 0.001972 | 438.65 | 0.0002382 |
| 101 | 244 | Methyl tert-butyl ether | C-{5} H-{12} O | 1634-04-4 | 88.1482 | -13.415 | 1050.5 | 0.33157 | 0 | 0 | 164.55 | 0.004801 | 328.2 | 0.0002502 |
| 101 | 245 | Methyl vinyl ether | C-{3} H-{6} O | 107-25-5 | 58.07914 | -10.34 | 519.61 | -0.013899 | 0 | 0 | 151.15 | 0.0009377 | 278.65 | 0.0001929 |
| 101 | 246 | Naphthalene | C-{10} H-{8} | 91-20-3 | 128.17052 | -19.308 | 1822.5 | 1.218 | 0 | 0 | 353.43 | 0.0009077 | 633.15 | 0.0001892 |
| 101 | 247 | Neon | Ne | 7440-01-9 | 20.1797 | -17.945 | 115.57 | 1.428 | -2.14E-17 | 10 | 25.09 | 0.0001602 | 44.13 | 0.00002706 |
| 101 | 248 | Nitroethane | C-{2} H-{5} NO-{2} | 79-24-3 | 75.0666 | -4.438 | 746.5 | -0.9385 | 0 | 0 | 200 | 0.00342 | 387.22 | 0.0003027 |
| 101 | 249 | Nitrogen | N-{2} | 7727-37-9 | 28.0134 | 16.004 | -181.61 | -5.1551 | 0 | 0 | 63.15 | 0.0002633 | 124 | 0.00003331 |
| 0 | 250 | Nitrogen trifluoride | F-{3} N | 7783-54-2 | 71.00191 | 0 | 0 | 0 | 0 | 0 | 0 | 0 | 0 | 0 |
| 101 | 251 | Nitromethane | CH-{3} NO-{2} | 75-52-5 | 61.04002 | -9.5556 | 981.64 | -0.19453 | 0 | 0 | 244.6 | 0.001344 | 374.35 | 0.0003078 |
| 101 | 252 | Nitrous oxide | N-{2} O | 10024-97-2 | 44.0128 | 19.329 | -381.68 | -4.8618 | 0 | 0 | 210 | 0.0002065 | 283.09 | 0.0000773 |
| 101 | 253 | Nitric oxide | NO | 10102-43-9 | 30.0061 | -246.65 | 3150.3 | 49.98 | -0.22541 | 1 | 109.5 | 0.0003858 | 180.05 | 0.00003791 |
| 101 | 254 | Nonadecane | C-{19} H-{40} | 629-92-5 | 268.5209 | -16.403 | 2119.5 | 0.6881 | 0 | 0 | 305.04 | 0.004012 | 603.15 | 0.0002068 |
| 101 | 255 | Nonanal | C-{9} H-{18} O | 124-19-6 | 142.23862 | -4.3492 | 1052.7 | -1.0035 | 0 | 0 | 267.3 | 0.002432 | 465.52 | 0.0002606 |
| 101 | 256 | Nonane | C-{9} H-{20} | 111-84-2 | 128.2551 | -68.54 | 3165.3 | 9.0919 | -0.000013519 | 2 | 218.15 | 0.003306 | 593.15 | 0.00004997 |
| 101 | 257 | Nonanoic acid | C-{9} H-{18} O-{2} | 112-05-0 | 158.238 | -48.851 | 4095 | 5.294 | 0 | 0 | 285.55 | 0.0103 | 528.75 | 0.000367 |
| 101 | 258 | 1-Nonanol | C-{9} H-{20} O | 143-08-8 | 144.2545 | -39.863 | 4089 | 3.7631 | 0 | 0 | 280 | 0.01733 | 486.25 | 0.0002823 |
| 101 | 259 | 2-Nonanol | C-{9} H-{20} O | 628-99-9 | 144.255 | -98.854 | 7183.8 | 12.283 | 0 | 0 | 238.15 | 0.231 | 471.7 | 0.0003334 |
| 101 | 260 | 1-Nonene | C-{9} H-{18} | 124-11-8 | 126.23922 | -11.069 | 1081.7 | 0 | 0 | 0 | 191.91 | 0.004372 | 420.02 | 0.0002048 |
| 101 | 261 | Nonyl mercaptan | C-{9} H-{20} S | 1455-21-6 | 160.3201 | -11.319 | 1428 | -0.022545 | 0 | 0 | 253.05 | 0.003026 | 492.95 | 0.0001912 |
| 101 | 262 | 1-Nonyne | C-{9} H-{16} | 3452-09-3 | 124.22334 | -2.3409 | 715.52 | -1.222 | 0 | 0 | 223.15 | 0.003206 | 487.2 | 0.0002172 |
| 101 | 263 | Octadecane | C-{18} H-{38} | 593-45-3 | 254.49432 | -22.688 | 2466 | 1.5703 | 0 | 0 | 301.31 | 0.003926 | 589.86 | 0.0002057 |
| 101 | 264 | Octanal | C-{8} H-{16} O | 124-13-0 | 128.212 | -2.5373 | 900.91 | -1.2685 | 0 | 0 | 251.65 | 0.002555 | 445.15 | 0.0002614 |
| 101 | 265 | Octane | C-{8} H-{18} | 111-65-9 | 114.22852 | -98.805 | 3905.5 | 14.103 | -0.000025112 | 2 | 211.15 | 0.002629 | 454.96 | 0.0001111 |
| 101 | 266 | Octanoic acid | C-{8} H-{16} O-{2} | 124-07-2 | 144.211 | -60.795 | 4617.8 | 7.028 | 0 | 0 | 289.65 | 0.006652 | 512.85 | 0.0003576 |
| 101 | 267 | 1-Octanol | C-{8} H-{18} O | 111-87-5 | 130.22792 | -0.22128 | 3018.4 | -2.8054 | 0.000013141 | 2 | 280 | 0.01472 | 468.35 | 0.0002902 |
| 101 | 268 | 2-Octanol | C-{8} H-{18} O | 123-96-6 | 130.228 | -145.99 | 9296.7 | 19.285 | 0 | 0 | 241.55 | 0.1856 | 452.9 | 0.0005409 |
| 101 | 269 | 2-Octanone | C-{8} H-{16} O | 111-13-7 | 128.21204 | -11.736 | 1415.2 | 0.0003618 | 0 | 0 | 252.85 | 0.002161 | 446.15 | 0.0001913 |
| 101 | 270 | 3-Octanone | C-{8} H-{16} O | 106-68-3 | 128.21204 | -20.804 | 1834.6 | 1.3403 | 0 | 0 | 255.55 | 0.002039 | 440.65 | 0.0002075 |
| 101 | 271 | 1-Octene | C-{8} H-{16} | 111-66-0 | 112.21264 | -11.19 | 1057.4 | 0 | 0 | 0 | 171.45 | 0.006587 | 453.52 | 0.0001422 |
| 101 | 272 | Octyl mercaptan | C-{8} H-{18} S | 111-88-6 | 146.29352 | -11.498 | 1362.1 | 0.015575 | 0 | 0 | 223.95 | 0.004837 | 472.19 | 0.0001999 |
| 101 | 273 | 1-Octyne | C-{8} H-{14} | 629-05-0 | 110.19676 | -3.8552 | 684.22 | -1.0071 | 0 | 0 | 193.55 | 0.003614 | 468 | 0.0001868 |
| 101 | 274 | Oxalic acid | C-{2} H-{2} O-{4} | 144-62-7 | 90.03488 | -27.978 | 2915.1 | 2.3374 | 0 | 0 | 462.65 | 0.0006539 | 516 | 0.0004399 |
| 101 | 275 | Oxygen | O-{2} | 7782-44-7 | 31.9988 | -4.1476 | 94.04 | -1.207 | 0 | 0 | 54.36 | 0.000717 | 150 | 0.0000699 |
| 101 | 276 | Ozone | O-{3} | 10028-15-6 | 47.9982 | -10.94 | 415.96 | 0 | 0 | 0 | 77.55 | 0.003787 | 208.8 | 0.00013 |
| 101 | 277 | Pentadecane | C-{15} H-{32} | 629-62-9 | 212.41458 | -19.299 | 2088.6 | 1.1091 | 0 | 0 | 283.07 | 0.003486 | 543.84 | 0.0002091 |
| 101 | 278 | Pentanal | C-{5} H-{10} O | 110-62-3 | 86.1323 | -8.2185 | 919.43 | -0.42363 | 0 | 0 | 191.59 | 0.003532 | 375.15 | 0.0002539 |
| 101 | 279 | Pentane | C-{5} H-{12} | 109-66-0 | 72.14878 | -53.509 | 1836.6 | 7.1409 | -0.000019627 | 2 | 143.42 | 0.003529 | 465.15 | 0.00004796 |
| 101 | 280 | Pentanoic acid | C-{5} H-{10} O-{2} | 109-52-4 | 102.132 | -37.067 | 2856.7 | 3.7344 | 0 | 0 | 270 | 0.003773 | 458.95 | 0.000351 |
| 101 | 281 | 1-Pentanol | C-{5} H-{12} O | 71-41-0 | 88.1482 | -36.561 | 3542.2 | 3.3364 | -8.05E-37 | 12.84 | 253.15 | 0.01649 | 410.95 | 0.0003842 |
| 101 | 282 | 2-Pentanol | C-{5} H-{12} O | 6032-29-7 | 88.1482 | -16.456 | 3209.9 | 0 | 0 | 0 | 200 | 0.666 | 392.2 | 0.0002557 |
| 101 | 283 | 2-Pentanone | C-{5} H-{10} O | 107-87-9 | 86.1323 | -11.055 | 1005.3 | 0.0039301 | 0 | 0 | 250 | 0.0009009 | 375.46 | 0.0002354 |
| 101 | 284 | 3-Pentanone | C-{5} H-{10} O | 96-22-0 | 86.1323 | -2.8695 | 596.32 | -1.2025 | 0 | 0 | 234.18 | 0.001024 | 375.14 | 0.0002232 |
| 101 | 285 | 1-Pentene | C-{5} H-{10} | 109-67-1 | 70.1329 | -10.667 | 659.56 | 0 | 0 | 0 | 108.02 | 0.01045 | 303.22 | 0.0002051 |
| 101 | 286 | 2-Pentyl mercaptan | C-{5} H-{12} S | 2084-19-7 | 104.21378 | -6.9168 | 818.76 | -0.59628 | 0 | 0 | 220 | 0.001643 | 385.15 | 0.0002385 |
| 101 | 287 | Pentyl mercaptan | C-{5} H-{12} S | 110-66-7 | 104.21378 | -11.677 | 1091.2 | 0.10658 | 0 | 0 | 197.45 | 0.003745 | 399.79 | 0.0002463 |
| 101 | 288 | 1-Pentyne | C-{5} H-{8} | 627-19-0 | 68.11702 | -1.7273 | 424.34 | -1.342 | 0 | 0 | 167.45 | 0.002322 | 378 | 0.0001898 |
| 101 | 289 | 2-Pentyne | C-{5} H-{8} | 627-21-4 | 68.11702 | -3.7241 | 516.54 | -1.1167 | 0 | 0 | 163.83 | 0.001902 | 415.2 | 0.0000998 |
| 101 | 290 | Phenanthrene | C-{14} H-{10} | 85-01-8 | 178.2292 | -22.472 | 2566.9 | 1.5749 | 0 | 0 | 372.38 | 0.00192 | 610.03 | 0.0002849 |
| 101 | 291 | Phenol | C-{6} H-{6} O | 108-95-2 | 94.11124 | -15.822 | 3301.8 | 0 | 0 | 0 | 291.45 | 0.01119 | 555.4 | 0.00005134 |
| 101 | 292 | Phenyl isocyanate | C-{7} H-{5} NO | 103-71-9 | 119.1207 | -11.31 | 1280 | 0 | 0 | 0 | 243.15 | 0.002368 | 522.4 | 0.000142 |
| 101 | 293 | Phthalic anhydride | C-{8} H-{4} O-{3} | 85-44-9 | 148.11556 | 195.25 | -11,072 | -29.084 | 0 | 0 | 404.15 | 0.001229 | 557.65 | 0.0001986 |
| 101 | 294 | Propadiene | C-{3} H-{4} | 463-49-0 | 40.06386 | -6.3528 | 240.85 | -0.58229 | 0 | 0 | 136.87 | 0.0005772 | 298.15 | 0.0001416 |
| 101 | 295 | Propane | C-{3} H-{8} | 74-98-6 | 44.09562 | -17.156 | 646.25 | 1.1101 | -7.34E-11 | 4 | 85.47 | 0.009458 | 360 | 0.00004275 |
| 101 | 296 | 1-Propanol | C-{3} H-{8} O | 71-23-8 | 60.09502 | 23.467 | 116.07 | -5.3372 | 2,880,100,000 | -4.0267 | 146.95 | 20.69 | 370.35 | 0.0004735 |
| 101 | 297 | 2-Propanol | C-{3} H-{8} O | 67-63-0 | 60.095 | -8.8918 | 2357.6 | -0.91376 | 0 | 0 | 185.26 | 0.3917 | 355.3 | 0.0004892 |
| 101 | 298 | Propenylcyclohexene | C-{9} H-{14} | 13511-13-2 | 122.20746 | -11.208 | 1079.8 | 0 | 0 | 0 | 199 | 0.003083 | 508.8 | 0.0001133 |
| 101 | 299 | Propionaldehyde | C-{3} H-{6} O | 123-38-6 | 58.07914 | -5.9402 | 617.95 | -0.74183 | 0 | 0 | 165 | 0.002522 | 322.15 | 0.000247 |
| 101 | 300 | Propionic acid | C-{3} H-{6} O-{2} | 79-09-4 | 74.0785 | -23.931 | 1834.6 | 1.9124 | 0 | 0 | 252.45 | 0.002275 | 414.32 | 0.000343 |
| 101 | 301 | Propionitrile | C-{3} H-{5} N | 107-12-0 | 55.0785 | -6.698 | 753.58 | -0.63783 | 0 | 0 | 180.37 | 0.002928 | 370.25 | 0.0002172 |
| 101 | 302 | Propyl acetate | C-{5} H-{10} O-{2} | 109-60-4 | 102.1317 | 17.797 | -252.43 | -4.291 | 0 | 0 | 250 | 0.001002 | 473.15 | 0.0001045 |
| 101 | 303 | Propyl amine | C-{3} H-{9} N | 107-10-8 | 59.11026 | -9.8074 | 1010.4 | -0.25697 | 0 | 0 | 188.36 | 0.00306 | 321 | 0.0002908 |
| 101 | 304 | Propylbenzene | C-{9} H-{12} | 103-65-1 | 120.19158 | -18.282 | 1549.7 | 1.0454 | 0 | 0 | 200 | 0.006774 | 432.39 | 0.0002357 |
| 101 | 305 | Propylene | C-{3} H-{6} | 115-07-1 | 42.07974 | -92.082 | 1907.3 | 15.639 | -0.043098 | 1 | 87.89 | 0.01549 | 333.15 | 0.00005147 |
| 101 | 306 | Propyl formate | C-{4} H-{8} O-{2} | 110-74-7 | 88.10512 | -73.735 | 2668.2 | 10.993 | -0.018364 | 1 | 180.25 | 0.005852 | 353.97 | 0.000281 |
| 101 | 307 | 2-Propyl mercaptan | C-{3} H-{8} S | 75-33-2 | 76.16062 | -5.7244 | 638.2 | -0.76415 | 0 | 0 | 142.61 | 0.006477 | 325.71 | 0.0002784 |
| 101 | 308 | Propyl mercaptan | C-{3} H-{8} S | 107-03-9 | 76.16062 | -10.153 | 840.71 | -0.093763 | 0 | 0 | 159.95 | 0.004641 | 340.87 | 0.0002656 |
| 101 | 309 | 1,2-Propylene glycol | C-{3} H-{8} O-{2} | 57-55-6 | 76.09442 | -804.54 | 30,487 | 130.79 | -0.15449 | 1 | 213.15 | 950.2 | 500.8 | 0.0003307 |
| 101 | 310 | Quinone | C-{6} H-{4} O-{2} | 106-51-4 | 108.09476 | -14.846 | 1829.4 | 0.3729 | 0 | 0 | 388.85 | 0.0003642 | 454 | 0.0001965 |
| 0 | 311 | Silicon tetrafluoride | F-{4} Si | 7783-61-1 | 104.07911 | 0 | 0 | 0 | 0 | 0 | 0 | 0 | 0 | 0 |
| 101 | 312 | Styrene | C-{8} H-{8} | 100-42-5 | 104.14912 | -22.675 | 1758 | 1.6701 | 0 | 0 | 242.54 | 0.001919 | 418.31 | 0.0002268 |
| 101 | 313 | Succinic acid | C-{4} H-{6} O-{4} | 110-15-6 | 118.08804 | -104.32 | 9615.1 | 12.587 | 0 | 0 | 460.85 | 0.001913 | 591 | 0.0004426 |
| 101 | 314 | Sulfur dioxide | O-{2} S | 7446-09-5 | 64.0638 | 46.223 | -1378 | -8.7475 | 0 | 0 | 225 | 0.00069 | 400 | 0.00006557 |
| 101 | 315 | Sulfur hexafluoride | F-{6} S | 2551-62-4 | 146.05542 | 3.8305 | 41.21 | -2.1342 | 0 | 0 | 223.15 | 0.0005388 | 318.69 | 0.0002383 |
| 101 | 316 | Sulfur trioxide | O-{3} S | 7446-11-9 | 80.0632 | -88.793 | 6400.7 | 10.709 | 0 | 0 | 289.95 | 0.002477 | 318.15 | 0.0009456 |
| 101 | 317 | Terephthalic acid | C-{8} H-{6} O-{4} | 100-21-0 | 166.13084 | -11.566 | 2843.2 | 0 | 0 | 0 | 700.15 | 0.0005502 | 795.28 | 0.0003385 |
| 101 | 318 | o-Terphenyl | C-{18} H-{14} | 84-15-1 | 230.30376 | -215.09 | 11,612 | 31.849 | -0.026882 | 1 | 329.35 | 0.01736 | 723.15 | 0.0001522 |
| 101 | 319 | Tetradecane | C-{14} H-{30} | 629-59-4 | 198.388 | -136.73 | 6421.3 | 19.493 | -0.00002297 | 2 | 277.65 | 0.00335 | 554.4 | 0.000117 |
| 101 | 320 | Tetrahydrofuran | C-{4} H-{8} O | 109-99-9 | 72.10572 | -10.321 | 900.92 | -0.069128 | 0 | 0 | 164.65 | 0.005505 | 373.15 | 0.0002446 |
| 101 | 321 | 1,2,3,4-Tetrahydronaphthalene | C-{10} H-{12} | 119-64-2 | 132.20228 | -118.86 | 5829.5 | 16.605 | -0.000016991 | 2 | 237.4 | 0.01183 | 576 | 0.0001458 |
| 101 | 322 | Tetrahydrothiophene | C-{4} H-{8} S | 110-01-0 | 88.17132 | -10.843 | 1165.2 | 0 | 0 | 0 | 293.15 | 0.00104 | 303.15 | 0.0009125 |
| 101 | 323 | 2,2,3,3-Tetramethylbutane | C-{8} H-{18} | 594-82-1 | 114.22852 | 5.5351 | 632.38 | -2.6576 | 0 | 0 | 373.96 | 0.0001999 | 454 | 0.00008859 |
| 101 | 324 | Thiophene | C-{4} H-{4} S | 110-02-1 | 84.13956 | -16.671 | 1342.5 | 0.8388 | 0 | 0 | 250 | 0.001269 | 393.15 | 0.0002625 |
| 101 | 325 | Toluene | C-{7} H-{8} | 108-88-3 | 92.13842 | -226.08 | 6805.7 | 37.542 | -0.060853 | 1 | 178.18 | 0.01569 | 383.78 | 0.0002428 |
| 101 | 326 | 1,1,2-Trichloroethane | C-{2} H-{3} Cl-{3} | 79-00-5 | 133.40422 | 0.388 | 736.5 | -1.7063 | 0 | 0 | 236.5 | 0.002955 | 387 | 0.0003798 |
| 101 | 327 | Tridecane | C-{13} H-{28} | 629-50-5 | 184.36142 | -111.98 | 5468.6 | 15.579 | -0.000016992 | 2 | 267.67 | 0.003399 | 540 | 0.000152 |
| 101 | 328 | Triethyl amine | C-{6} H-{15} N | 121-44-8 | 101.19 | -3.7067 | 585.78 | -1.0926 | 0 | 0 | 250 | 0.0006135 | 359.05 | 0.0002028 |
| 101 | 329 | Trimethyl amine | C-{3} H-{9} N | 75-50-3 | 59.11026 | 10.142 | -130.41 | -3.2199 | 0 | 0 | 200 | 0.0005156 | 308.15 | 0.0001612 |
| 101 | 330 | 1,2,3-Trimethylbenzene | C-{9} H-{12} | 526-73-8 | 120.19158 | -11.756 | 1483.1 | -0.040387 | 0 | 0 | 247.79 | 0.002495 | 449.27 | 0.0001663 |
| 101 | 331 | 1,2,4-Trimethylbenzene | C-{9} H-{12} | 95-63-6 | 120.19158 | -9.6461 | 1281.2 | -0.29478 | 0 | 0 | 229.33 | 0.003477 | 442.53 | 0.0001942 |
| 101 | 332 | 2,2,4-Trimethylpentane | C-{8} H-{18} | 540-84-1 | 114.22852 | -12.928 | 1137.5 | 0.25725 | -3.69E-28 | 10 | 165.78 | 0.008636 | 541.15 | 0.0000453 |
| 101 | 333 | 2,3,3-Trimethylpentane | C-{8} H-{18} | 560-21-4 | 114.22852 | -4.0309 | 990.76 | -1.1771 | 0 | 0 | 172.22 | 0.01305 | 387.91 | 0.0002049 |
| 101 | 334 | 1,3,5-Trinitrobenzene | C-{6} H-{3} N-{3} O-{6} | 99-35-4 | 213.10452 | -10.707 | 1818.5 | 0 | 0 | 0 | 398.4 | 0.00215 | 676.8 | 0.0003288 |
| 101 | 335 | 2,4,6-Trinitrotoluene | C-{7} H-{5} N-{3} O-{6} | 118-96-7 | 227.1311 | -11.504 | 3301 | -0.39102 | 0 | 0 | 353.15 | 0.01167 | 625 | 0.0001601 |
| 101 | 336 | Undecane | C-{11} H-{24} | 1120-21-4 | 156.30826 | 52.176 | -4951.9 | -8.5676 | 570,980 | 0 | 247.57 | 0.00324 | 511.2 | 0.0001569 |
| 101 | 337 | 1-Undecanol | C-{11} H-{24} O | 112-42-5 | 172.30766 | -69.778 | 5905.2 | 8.0214 | 0 | 0 | 288.45 | 0.02089 | 590.15 | 0.0001856 |
| 101 | 338 | Vinyl acetate | C-{4} H-{6} O-{2} | 108-05-4 | 86.08924 | -22.407 | 1462.8 | 1.7006 | 0 | 0 | 225 | 0.001237 | 345.65 | 0.0002654 |
| 101 | 339 | Vinyl acetylene | C-{4} H-{4} | 689-97-4 | 52.07456 | -2.2333 | 320.37 | -1.2915 | 0 | 0 | 173.15 | 0.0008764 | 364 | 0.0001273 |
| 101 | 340 | Vinyl chloride | C-{2} H-{3} Cl | 75-01-4 | 62.49822 | 0.26297 | 276.55 | -1.7282 | 0 | 0 | 130 | 0.002425 | 400 | 0.00008272 |
| 101 | 341 | Vinyl trichlorosilane | C-{2} H-{3} Cl-{3} Si | 75-94-5 | 161.48972 | -10.37 | 823.31 | 0 | 0 | 0 | 178.35 | 0.003171 | 434.52 | 0.0002086 |
| 101 | 342 | Water | H-{2} O | 7732-18-5 | 18.01528 | -52.843 | 3703.6 | 5.866 | -5.88E-29 | 10 | 273.16 | 0.001702 | 646.15 | 0.00005028 |
| 101 | 343 | m-Xylene | C-{8} H-{10} | 108-38-3 | 106.165 | -11.91 | 1094.9 | 0.13825 | 0 | 0 | 225.3 | 0.001834 | 413.1 | 0.0002189 |
| 101 | 344 | o-Xylene | C-{8} H-{10} | 95-47-6 | 106.165 | -15.489 | 1393.5 | 0.63711 | 0 | 0 | 247.98 | 0.001735 | 418.1 | 0.0002459 |
| 101 | 345 | p-Xylene | C-{8} H-{10} | 106-42-3 | 106.165 | -7.381 | 911.7 | -0.54152 | 0 | 0 | 286.41 | 0.0007021 | 413.1 | 0.0002169 |

SHEET 2

| Cmpd.  no. | Name | Formula | CAS | Mol. wt. | C1 | C2 | C3 | C4 | C5 | T_{min} , K | Thermal cond.  at T_{min} | T_{max} , K | Thermal  cond. at T_{max} |
| --- | --- | --- | --- | --- | --- | --- | --- | --- | --- | --- | --- | --- | --- |
| 1 | Acetaldehyde | C_{2} H_{4} O | 75-07-0 | 44.05256 | 0.33515 | -0.00055227 | 0 | 0 | 0 | 149.78 | 0.2524 | 294.15 | 0.1727 |
| 2 | Acetamide | C_{2} H_{5} NO | 60-35-5 | 59.0672 | 0.39363 | -0.00037053 | 0 | 0 | 0 | 353.33 | 0.2627 | 494.3 | 0.2105 |
| 3 | Acetic acid | C_{2} H_{4} O_{2} | 64-19-7 | 60.052 | 0.214 | -0.0001834 | 0 | 0 | 0 | 289.81 | 0.1608 | 391.05 | 0.1423 |
| 4 | Acetic anhydride | C_{4} H_{6} O_{3} | 108-24-7 | 102.08864 | 0.23638 | -0.00024263 | 0 | 0 | 0 | 200.15 | 0.1878 | 412.7 | 0.1362 |
| 5 | Acetone | C_{3} H_{6} O | 67-64-1 | 58.07914 | 0.2878 | -0.000427 | 0 | 0 | 0 | 178.45 | 0.2116 | 343.15 | 0.1413 |
| 6 | Acetonitrile | C_{2} H_{3} N | 75-05-8 | 41.0519 | 0.30755 | -0.000402 | 0 | 0 | 0 | 229.32 | 0.2154 | 354.81 | 0.1649 |
| 7 | Acetylene | C_{2} H_{2} | 74-86-2 | 26.03728 | 0.33363 | -0.00083655 | 0 | 0 | 0 | 192.4 | 0.1727 | 250 | 0.1245 |
| 8 | Acrolein | C_{3} H_{4} O | 107-02-8 | 56.06326 | 0.2703 | -0.0003764 | 0 | 0 | 0 | 185.45 | 0.2005 | 325.84 | 0.1477 |
| 9 | Acrylic acid | C_{3} H_{4} O_{2} | 79-10-7 | 72.06266 | 0.2441 | -0.0002904 | 0 | 0 | 0 | 286.15 | 0.161 | 484.5 | 0.1034 |
| 10 | Acrylonitrile | C_{3} H_{3} N | 107-13-1 | 53.0626 | 0.30751 | -0.000487 | 0 | 0 | 0 | 189.63 | 0.2152 | 350.45 | 0.1368 |
| 11 | Air | Mixture | 132259-10-0 | 28.96 | 0.28472 | -0.0017393 | 0 | 0 | 0 | 75 | 0.1543 | 125 | 0.0673 |
| 12 | Ammonia | H_{3} N | 7664-41-7 | 17.03052 | 1.169 | -0.002314 | 0 | 0 | 0 | 195.41 | 0.7168 | 400.05 | 0.2433 |
| 13 | Anisole | C_{7} H_{8} O | 100-66-3 | 108.13782 | 0.23494 | -0.00026477 | 0 | 0 | 0 | 235.65 | 0.1725 | 512.5 | 0.0993 |
| 14 | Argon | Ar | 7440-37-1 | 39.948 | 0.1819 | -0.0003176 | -0.00000411 | 0 | 0 | 83.78 | 0.1264 | 150 | 0.0418 |
| 15 | Benzamide | C_{7} H_{7} NO | 55-21-0 | 121.13658 | 0.28485 | -0.00025225 | 0 | 0 | 0 | 403 | 0.1832 | 563.15 | 0.1428 |
| 16 | Benzene | C_{6} H_{6} | 71-43-2 | 78.11184 | 0.23444 | -0.00030572 | 0 | 0 | 0 | 278.68 | 0.1492 | 413.1 | 0.1081 |
| 17 | Benzenethiol | C_{6} H_{6} S | 108-98-5 | 110.17684 | 0.20996 | -0.0002146 | 0 | 0 | 0 | 258.27 | 0.1545 | 442.29 | 0.115 |
| 18 | Benzoic acid | C_{7} H_{6} O_{2} | 65-85-0 | 122.12134 | 0.2391 | -0.0002325 | 0 | 0 | 0 | 395.45 | 0.1472 | 596 | 0.1005 |
| 19 | Benzonitrile | C_{7} H_{5} N | 100-47-0 | 103.1213 | 0.20603 | -0.00021023 | 0 | 0 | 0 | 260.28 | 0.1513 | 464.15 | 0.1085 |
| 20 | Benzophenone | C_{13} H_{10} O | 119-61-9 | 182.2179 | 0.25867 | -0.00022516 | 0 | 0 | 0 | 321.35 | 0.1863 | 664 | 0.1092 |
| 21 | Benzyl alcohol | C_{7} H_{8} O | 100-51-6 | 108.13782 | 0.17847 | -0.000065843 | 0 | 0 | 0 | 257.85 | 0.1615 | 478.6 | 0.147 |
| 22 | Benzyl ethyl ether | C_{9} H_{12} O | 539-30-0 | 136.19098 | 0.2029 | -0.0002226 | 0 | 0 | 0 | 275.65 | 0.1415 | 528.6 | 0.0852 |
| 23 | Benzyl mercaptan | C_{7} H_{8} S | 100-53-8 | 124.20342 | 0.20316 | -0.00019912 | 0 | 0 | 0 | 243.95 | 0.1546 | 472.03 | 0.1092 |
| 24 | Biphenyl | C_{12} H_{10} | 92-52-4 | 154.2078 | 0.19053 | -0.00015145 | 0 | 0 | 0 | 342.2 | 0.1387 | 723.15 | 0.081 |
| 25 | Bromine | Br_{2} | 7726-95-6 | 159.808 | -0.2185 | 0.0042143 | -0.000017753 | 3.1041E-08 | -2.01E-11 | 266 | 0.1299 | 584 | 0.0316 |
| 26 | Bromobenzene | C_{6} H_{5} Br | 108-86-1 | 157.0079 | 0.16983 | -0.0001981 | 0 | 0 | 0 | 242.43 | 0.1218 | 429.24 | 0.0848 |
| 27 | Bromoethane | C_{2} H_{5} Br | 74-96-4 | 108.965 | 0.1629 | -0.00021198 | 0 | 0 | 0 | 154.25 | 0.1302 | 327 | 0.0936 |
| 28 | Bromomethane | CH_{3} Br | 74-83-9 | 94.93852 | 0.16143 | -0.00021287 | 0 | 0 | 0 | 179.44 | 0.1232 | 413.15 | 0.0735 |
| 29 | 1,2-Butadiene | C_{4} H_{6} | 590-19-2 | 54.09044 | 0.21966 | -0.0003436 | 0 | 0 | 0 | 136.95 | 0.1726 | 284 | 0.1221 |
| 30 | 1,3-Butadiene | C_{4} H_{6} | 106-99-0 | 54.09044 | 0.22231 | -0.0003664 | 0 | 0 | 0 | 164.25 | 0.1621 | 268.74 | 0.1238 |
| 31 | Butane | C_{4} H_{10} | 106-97-8 | 58.1222 | 0.27349 | -0.00071267 | 5.1555E-07 | 0 | 0 | 134.86 | 0.1868 | 400 | 0.0709 |
| 32 | 1,2-Butanediol | C_{4} H_{10} O_{2} | 584-03-2 | 90.121 | 0.064621 | 0.00067625 | -1.05E-06 | 0 | 0 | 220 | 0.1626 | 469.57 | 0.1508 |
| 33 | 1,3-Butanediol | C_{4} H_{10} O_{2} | 107-88-0 | 90.121 | -0.0032865 | 0.0011463 | -1.55E-06 | 0 | 0 | 196.15 | 0.1618 | 481.38 | 0.1888 |
| 34 | 1-Butanol | C_{4} H_{10} O | 71-36-3 | 74.1216 | 0.22888 | -0.00025 | 0 | 0 | 0 | 183.85 | 0.1829 | 391 | 0.1311 |
| 35 | 2-Butanol | C_{4} H_{10} O | 78-92-2 | 74.1216 | 0.18599 | -0.00017227 | 0 | 0 | 0 | 158.45 | 0.1587 | 372.9 | 0.1218 |
| 36 | 1-Butene | C_{4} H_{8} | 106-98-9 | 56.10632 | 0.22153 | -0.00035023 | 0 | 0 | 0 | 87.8 | 0.1908 | 266.91 | 0.1281 |
| 37 | cis-2-Butene | C_{4} H_{8} | 590-18-1 | 56.10632 | 0.21378 | -0.00035445 | 0 | 0 | 0 | 134.26 | 0.1662 | 276.87 | 0.1156 |
| 38 | trans-2-Butene | C_{4} H_{8} | 624-64-6 | 56.10632 | 0.21153 | -0.00035056 | 0 | 0 | 0 | 167.62 | 0.1528 | 274.03 | 0.1155 |
| 39 | Butyl acetate | C_{6} H_{12} O_{2} | 123-86-4 | 116.15828 | 0.21721 | -0.00026563 | 0 | 0 | 0 | 199.65 | 0.1642 | 453.75 | 0.0967 |
| 40 | Butylbenzene | C_{10} H_{14} | 104-51-8 | 134.21816 | 0.18707 | -0.00020037 | 0 | 0 | 0 | 185.3 | 0.1499 | 473.15 | 0.0923 |
| 41 | Butyl mercaptan | C_{4} H_{10} S | 109-79-5 | 90.1872 | 0.21143 | -0.000258 | 0 | 0 | 0 | 157.46 | 0.1708 | 371.61 | 0.1156 |
| 42 | sec-Butyl mercaptan | C_{4} H_{10} S | 513-53-1 | 90.1872 | 0.2069 | -0.0002568 | 0 | 0 | 0 | 133.02 | 0.1727 | 358.13 | 0.1149 |
| 43 | 1-Butyne | C_{4} H_{6} | 107-00-6 | 54.09044 | 0.22334 | -0.0003515 | 0 | 0 | 0 | 147.43 | 0.1715 | 281.22 | 0.1245 |
| 44 | Butyraldehyde | C_{4} H_{8} O | 123-72-8 | 72.10572 | 0.24962 | -0.000325 | 0 | 0 | 0 | 176.8 | 0.1922 | 347.94 | 0.1365 |
| 45 | Butyric acid | C_{4} H_{8} O_{2} | 107-92-6 | 88.1051 | 0.1967 | -0.000168 | 0 | 0 | 0 | 267.95 | 0.1517 | 573.15 | 0.1004 |
| 46 | Butyronitrile | C_{4} H_{7} N | 109-74-0 | 69.1051 | 0.24077 | -0.00028665 | 0 | 0 | 0 | 161.3 | 0.1945 | 390.74 | 0.1288 |
| 47 | Carbon dioxide | CO_{2} | 124-38-9 | 44.0095 | 0.4406 | -0.0012175 | 0 | 0 | 0 | 216.58 | 0.1769 | 300 | 0.0754 |
| 48 | Carbon disulfide | CS_{2} | 75-15-0 | 76.1407 | 0.2333 | -0.000275 | 0 | 0 | 0 | 161.11 | 0.189 | 319.37 | 0.1455 |
| 49 | Carbon monoxide | CO | 630-08-0 | 28.0101 | 0.2855 | -0.001784 | 0 | 0 | 0 | 68.15 | 0.1639 | 125 | 0.0625 |
| 50 | Carbon tetrachloride | CCl_{4} | 56-23-5 | 153.8227 | 0.1589 | -0.0001987 | 0 | 0 | 0 | 250.33 | 0.1092 | 349.79 | 0.0894 |
| 51 | Carbon tetrafluoride | CF_{4} | 75-73-0 | 88.0043 | 0.20771 | -0.00078883 | 0 | 0 | 0 | 89.56 | 0.1371 | 145.1 | 0.0933 |
| 52 | Chlorine | Cl_{2} | 7782-50-5 | 70.906 | 0.2246 | -0.000064 | -0.000000788 | 0 | 0 | 172.12 | 0.1902 | 410 | 0.0659 |
| 53 | Chlorobenzene | C_{6} H_{5} Cl | 108-90-7 | 112.5569 | 0.1841 | -0.0001917 | 0 | 0 | 0 | 227.95 | 0.1404 | 404.87 | 0.1065 |
| 54 | Chloroethane | C_{2} H_{5} Cl | 75-00-3 | 64.5141 | 0.23779 | -0.000395209 | 0 | 0 | 0 | 136.75 | 0.1837 | 348.15 | 0.1002 |
| 55 | Chloroform | CHCl_{3} | 67-66-3 | 119.37764 | 0.1778 | -0.0002023 | 0 | 0 | 0 | 209.63 | 0.1354 | 400 | 0.0969 |
| 56 | Chloromethane | CH_{3} Cl | 74-87-3 | 50.4875 | 0.25381 | -0.000431803 | 0 | 0 | 0 | 175.43 | 0.1781 | 333 | 0.11 |
| 57 | 1-Chloropropane | C_{3} H_{7} Cl | 540-54-5 | 78.54068 | 0.21851 | -0.00033762 | 0 | 0 | 0 | 150.35 | 0.1677 | 393.15 | 0.0858 |
| 58 | 2-Chloropropane | C_{3} H_{7} Cl | 75-29-6 | 78.54068 | 0.21232 | -0.0003149 | 0 | 0 | 0 | 155.97 | 0.1632 | 386.7 | 0.0906 |
| 59 | m-Cresol | C_{7} H_{8} O | 108-39-4 | 108.13782 | 0.18241 | -0.00011109 | 0 | 0 | 0 | 285.39 | 0.1507 | 475.43 | 0.1296 |
| 60 | o-Cresol | C_{7} H_{8} O | 95-48-7 | 108.13782 | 0.19186 | -0.0001303 | 0 | 0 | 0 | 304.19 | 0.1522 | 464.15 | 0.1314 |
| 61 | p-Cresol | C_{7} H_{8} O | 106-44-5 | 108.13782 | 0.17971 | -0.00012037 | 0 | 0 | 0 | 307.93 | 0.1426 | 475.13 | 0.1225 |
| 62 | Cumene | C_{9} H_{12} | 98-82-8 | 120.19158 | 0.1855 | -0.00020895 | 0 | 0 | 0 | 177.14 | 0.1485 | 413.15 | 0.0992 |
| 63 | Cyanogen | C_{2} N_{2} | 460-19-5 | 52.0348 | 0.37845 | -0.00069945 | 0 | 0 | 0 | 245.25 | 0.2069 | 251.9 | 0.2023 |
| 64 | Cyclobutane | C_{4} H_{8} | 287-23-0 | 56.10632 | 0.22262 | -0.00034082 | 0 | 0 | 0 | 182.48 | 0.1604 | 285.66 | 0.1253 |
| 65 | Cyclohexane | C_{6} H_{12} | 110-82-7 | 84.15948 | 0.19813 | -0.0002505 | 0 | 0 | 0 | 279.69 | 0.1281 | 353.87 | 0.1095 |
| 66 | Cyclohexanol | C_{6} H_{12} O | 108-93-0 | 100.15888 | 0.1715 | -0.0001255 | 0 | 0 | 0 | 296.6 | 0.1343 | 563.15 | 0.1008 |
| 67 | Cyclohexanone | C_{6} H_{10} O | 108-94-1 | 98.143 | 0.17557 | -0.00012392 | 0 | 0 | 0 | 242 | 0.1456 | 428.58 | 0.1225 |
| 68 | Cyclohexene | C_{6} H_{10} | 110-83-8 | 82.1436 | 0.20926 | -0.00026037 | 0 | 0 | 0 | 169.67 | 0.1651 | 356.12 | 0.1165 |
| 69 | Cyclopentane | C_{5} H_{10} | 287-92-3 | 70.1329 | 0.2066 | -0.0002696 | 0 | 0 | 0 | 179.28 | 0.1583 | 322.4 | 0.1197 |
| 70 | Cyclopentene | C_{5} H_{8} | 142-29-0 | 68.11702 | 0.21776 | -0.00027783 | 0 | 0 | 0 | 138.13 | 0.1794 | 333.15 | 0.1252 |
| 71 | Cyclopropane | C_{3} H_{6} | 75-19-4 | 42.07974 | 0.24348 | -0.00042568 | 0 | 0 | 0 | 145.59 | 0.1815 | 240.37 | 0.1412 |
| 72 | Cyclohexyl mercaptan | C_{6} H_{12} S | 1569-69-3 | 116.22448 | 0.18374 | -0.0001925 | 0 | 0 | 0 | 189.64 | 0.1472 | 431.95 | 0.1006 |
| 73 | Decanal | C_{10} H_{20} O | 112-31-2 | 156.2652 | 0.21363 | -0.00023004 | 0 | 0 | 0 | 285 | 0.1481 | 481.65 | 0.1028 |
| 74 | Decane | C_{10} H_{22} | 124-18-5 | 142.28168 | 0.2063 | -0.00025 | 0 | 0 | 0 | 243.51 | 0.1454 | 447.3 | 0.0945 |
| 75 | Decanoic acid | C_{10} H_{20} O_{2} | 334-48-5 | 172.265 | 0.206 | -0.0002 | 0 | 0 | 0 | 304.75 | 0.1451 | 543.15 | 0.0974 |
| 76 | 1-Decanol | C_{10} H_{22} O | 112-30-1 | 158.28108 | 0.236171 | -0.00025 | 0 | 0 | 0 | 280.05 | 0.1662 | 503 | 0.1104 |
| 77 | 1-Decene | C_{10} H_{20} | 872-05-9 | 140.2658 | 0.20237 | -0.00024187 | 0 | 0 | 0 | 206.89 | 0.1523 | 443.75 | 0.095 |
| 78 | Decyl mercaptan | C_{10} H_{22} S | 143-10-2 | 174.34668 | 0.20134 | -0.00020826 | 0 | 0 | 0 | 247.56 | 0.1498 | 512.35 | 0.0946 |
| 79 | 1-Decyne | C_{10} H_{18} | 764-93-2 | 138.24992 | 0.20839 | -0.00023622 | 0 | 0 | 0 | 229.15 | 0.1543 | 447.15 | 0.1028 |
| 80 | Deuterium | D_{2} | 7782-39-0 | 4.0316 | 1.264 | 0 | 0 | 0 | 0 | 20.4 | 1.264 | 20.4 | 1.264 |
| 81 | 1,1-Dibromoethane | C_{2} H_{4} Br_{2} | 557-91-5 | 187.86116 | 0.1426 | -0.00016402 | 0 | 0 | 0 | 210.15 | 0.1081 | 498.4 | 0.0609 |
| 82 | 1,2-Dibromoethane | C_{2} H_{4} Br_{2} | 106-93-4 | 187.86116 | 0.13622 | -0.0001179 | 0 | 0 | 0 | 282.85 | 0.1029 | 404.51 | 0.0885 |
| 83 | Dibromomethane | CH_{2} Br_{2} | 74-95-3 | 173.83458 | 0.17558 | -0.00022499 | 0 | 0 | 0 | 220.6 | 0.1259 | 370.1 | 0.0923 |
| 84 | Dibutyl ether | C_{8} H_{18} O | 142-96-1 | 130.22792 | 0.19418 | -0.00022246 | 0 | 0 | 0 | 175.3 | 0.1552 | 523.15 | 0.0778 |
| 85 | m-Dichlorobenzene | C_{6} H_{4} Cl_{2} | 541-73-1 | 147.00196 | 0.16694 | -0.0001667 | 0 | 0 | 0 | 248.39 | 0.1255 | 446.23 | 0.0926 |
| 86 | o-Dichlorobenzene | C_{6} H_{4} Cl_{2} | 95-50-1 | 147.00196 | 0.16994 | -0.0001637 | 0 | 0 | 0 | 262.87 | 0.1269 | 351.71 | 0.1124 |
| 87 | p-Dichlorobenzene | C_{6} H_{4} Cl_{2} | 106-46-7 | 147.00196 | 0.16977 | -0.0001799 | 0 | 0 | 0 | 326.14 | 0.1111 | 548 | 0.0712 |
| 88 | 1,1-Dichloroethane | C_{2} H_{4} Cl_{2} | 75-34-3 | 98.95916 | 0.18881 | -0.00026083 | 0 | 0 | 0 | 176.19 | 0.1429 | 416.9 | 0.0801 |
| 89 | 1,2-Dichloroethane | C_{2} H_{4} Cl_{2} | 107-06-2 | 98.95916 | 0.214 | -0.000266 | 0 | 0 | 0 | 253.15 | 0.1467 | 356.59 | 0.1191 |
| 90 | Dichloromethane | CH_{2} Cl_{2} | 75-09-2 | 84.93258 | 0.23847 | -0.00033366 | 0 | 0 | 0 | 178.01 | 0.1791 | 325 | 0.13 |
| 91 | 1,1-Dichloropropane | C_{3} H_{6} Cl_{2} | 78-99-9 | 112.98574 | 0.18 | -0.00023144 | 0 | 0 | 0 | 192.5 | 0.1354 | 438 | 0.0786 |
| 92 | 1,2-Dichloropropane | C_{3} H_{6} Cl_{2} | 78-87-5 | 112.98574 | 0.19653 | -0.00025012 | 0 | 0 | 0 | 172.71 | 0.1533 | 457.6 | 0.0821 |
| 93 | Diethanol amine | C_{4} H_{11} NO_{2} | 111-42-2 | 105.13564 | 0.0218 | 0.0010315 | -0.000001355 | 0 | 0 | 301.15 | 0.2095 | 673.15 | 0.1022 |
| 94 | Diethyl amine | C_{4} H_{11} N | 109-89-7 | 73.13684 | 0.2587 | -0.00054343 | 4.2097E-07 | 0 | 0 | 223.35 | 0.1583 | 453.15 | 0.0989 |
| 95 | Diethyl ether | C_{4} H_{10} O | 60-29-7 | 74.1216 | 0.2495 | -0.000407 | 0 | 0 | 0 | 156.85 | 0.1857 | 433.15 | 0.0732 |
| 96 | Diethyl sulfide | C_{4} H_{10} S | 352-93-2 | 90.1872 | 0.21065 | -0.0002623 | 0 | 0 | 0 | 169.2 | 0.1663 | 365.25 | 0.1148 |
| 97 | 1,1-Difluoroethane | C_{2} H_{4} F_{2} | 75-37-6 | 66.04997 | 0.27019 | -0.000661 | 3.443E-07 | 0 | 0 | 154.56 | 0.1763 | 363.15 | 0.0756 |
| 98 | 1,2-Difluoroethane | C_{2} H_{4} F_{2} | 624-72-6 | 66.04997 | 0.23171 | -0.00038503 | 0 | 0 | 0 | 179.6 | 0.1626 | 372.8 | 0.0882 |
| 99 | Difluoromethane | CH_{2} F_{2} | 75-10-5 | 52.02339 | 0.37296 | -0.00088707 | 2.5762E-07 | 0 | 0 | 136.95 | 0.2563 | 302.56 | 0.1282 |
| 100 | Di-isopropyl amine | C_{6} H_{15} N | 108-18-9 | 101.19 | 0.1844 | -0.000239 | 0 | 0 | 0 | 176.85 | 0.1421 | 357.05 | 0.0991 |
| 101 | Di-isopropyl ether | C_{6} H_{14} O | 108-20-3 | 102.17476 | 0.19162 | -0.0002762 | 0 | 0 | 0 | 187.65 | 0.1398 | 400.1 | 0.0811 |
| 102 | Di-isopropyl ketone | C_{7} H_{14} O | 565-80-0 | 114.18546 | 0.22076 | -0.00027624 | 0 | 0 | 0 | 204.81 | 0.1642 | 460 | 0.0937 |
| 103 | 1,1-Dimethoxyethane | C_{4} H_{10} O_{2} | 534-15-6 | 90.121 | 0.22078 | -0.00031271 | 0 | 0 | 0 | 159.95 | 0.1708 | 337.45 | 0.1153 |
| 104 | 1,2-Dimethoxypropane | C_{5} H_{12} O_{2} | 7778-85-0 | 104.14758 | 0.22998 | -0.00030372 | 0 | 0 | 0 | 226.1 | 0.1613 | 366.15 | 0.1188 |
| 105 | Dimethyl acetylene | C_{4} H_{6} | 503-17-3 | 54.09044 | 0.22773 | -0.00034804 | 0 | 0 | 0 | 240.91 | 0.1439 | 300.13 | 0.1233 |
| 106 | Dimethyl amine | C_{2} H_{7} N | 124-40-3 | 45.08368 | 0.2454 | -0.000338 | 0 | 0 | 0 | 180.96 | 0.1842 | 403.15 | 0.1091 |
| 107 | 2,3-Dimethylbutane | C_{6} H_{14} | 79-29-8 | 86.17536 | 0.1774 | -0.0002436 | 0 | 0 | 0 | 145.19 | 0.142 | 331.15 | 0.0967 |
| 108 | 1,1-Dimethylcyclohexane | C_{8} H_{16} | 590-66-9 | 112.21264 | 0.1807 | -0.0002177 | 0 | 0 | 0 | 239.66 | 0.1285 | 392.7 | 0.0952 |
| 109 | cis-1,2-Dimethylcyclohexane | C_{8} H_{16} | 2207-01-4 | 112.21264 | 0.18092 | -0.0002108 | 0 | 0 | 0 | 223.16 | 0.1339 | 402.94 | 0.096 |
| 110 | trans-1,2-Dimethylcyclohexane | C_{8} H_{16} | 6876-23-9 | 112.21264 | 0.17675 | -0.0002077 | 0 | 0 | 0 | 184.99 | 0.1383 | 596.15 | 0.0529 |
| 111 | Dimethyl disulfide | C_{2} H_{6} S_{2} | 624-92-0 | 94.19904 | 0.21373 | -0.0002447 | 0 | 0 | 0 | 188.44 | 0.1676 | 382.9 | 0.12 |
| 112 | Dimethyl ether | C_{2} H_{6} O | 115-10-6 | 46.06844 | 0.31174 | -0.0005638 | 0 | 0 | 0 | 131.65 | 0.2375 | 320.03 | 0.1313 |
| 113 | N,N-Dimethyl formamide | C_{3} H_{7} NO | 68-12-2 | 73.09378 | 0.26 | -0.000255 | 0 | 0 | 0 | 250 | 0.1963 | 425.15 | 0.1516 |
| 114 | 2,3-Dimethylpentane | C_{7} H_{16} | 565-59-3 | 100.20194 | 0.17964 | -0.000246 | 0 | 0 | 0 | 160 | 0.1403 | 362.93 | 0.0904 |
| 115 | Dimethyl phthalate | C_{10} H_{10} O_{4} | 131-11-3 | 194.184 | 0.13905 | 0.0001509 | -3.98E-07 | 0 | 0 | 273.15 | 0.1506 | 556.85 | 0.0997 |
| 116 | Dimethylsilane | C_{2} H_{8} Si | 1111-74-6 | 60.17042 | 0.25547 | -0.0004411 | 0 | 0 | 0 | 122.93 | 0.2012 | 253.55 | 0.1436 |
| 117 | Dimethyl sulfide | C_{2} H_{6} S | 75-18-3 | 62.134 | 0.23942 | -0.0003311 | 0 | 0 | 0 | 174.88 | 0.1815 | 310.48 | 0.1366 |
| 118 | Dimethyl sulfoxide | C_{2} H_{6} OS | 67-68-5 | 78.13344 | 0.3142 | -0.00030809 | 0 | 0 | 0 | 291.67 | 0.2243 | 464 | 0.1712 |
| 119 | Dimethyl terephthalate | C_{10} H_{10} O_{4} | 120-61-6 | 194.184 | 0.21956 | -0.000209955 | 0 | 0 | 0 | 413.79 | 0.1327 | 559.2 | 0.1022 |
| 120 | 1,4-Dioxane | C_{4} H_{8} O_{2} | 123-91-1 | 88.10512 | 0.3027 | -0.0004827 | 0 | 0 | 0 | 284.95 | 0.1652 | 374.47 | 0.1219 |
| 121 | Diphenyl ether | C_{12} H_{10} O | 101-84-8 | 170.2072 | 0.18686 | -0.00014953 | 0 | 0 | 0 | 300.03 | 0.142 | 531.46 | 0.1074 |
| 122 | Dipropyl amine | C_{6} H_{15} N | 142-84-7 | 101.19 | 0.2224 | -0.000314 | 0 | 0 | 0 | 210.15 | 0.1564 | 382 | 0.1025 |
| 123 | Dodecane | C_{12} H_{26} | 112-40-3 | 170.33484 | 0.2047 | -0.0002326 | 0 | 0 | 0 | 263.57 | 0.1434 | 489.47 | 0.0909 |
| 124 | Eicosane | C_{20} H_{42} | 112-95-8 | 282.54748 | 0.2178 | -0.0002233 | 0 | 0 | 0 | 309.58 | 0.1487 | 616.93 | 0.08 |
| 125 | Ethane | C_{2} H_{6} | 74-84-0 | 30.069 | 0.35758 | -0.0011458 | 6.1866E-07 | 0 | 0 | 90.35 | 0.2591 | 300 | 0.0695 |
| 126 | Ethanol | C_{2} H_{6} O | 64-17-5 | 46.06844 | 0.2468 | -0.000264 | 0 | 0 | 0 | 159.05 | 0.2048 | 353.15 | 0.1536 |
| 127 | Ethyl acetate | C_{4} H_{8} O_{2} | 141-78-6 | 88.10512 | 0.2501 | -0.0003563 | 0 | 0 | 0 | 189.6 | 0.1825 | 350.21 | 0.1253 |
| 128 | Ethyl amine | C_{2} H_{7} N | 75-04-7 | 45.08368 | 0.30059 | -0.000581 | 6.602E-07 | 0 | 0 | 192.15 | 0.2133 | 293.15 | 0.187 |
| 129 | Ethylbenzene | C_{8} H_{10} | 100-41-4 | 106.165 | 0.1999 | -0.00023823 | 0 | 0 | 0 | 178.2 | 0.1574 | 413.1 | 0.1015 |
| 130 | Ethyl benzoate | C_{9} H_{10} O_{2} | 93-89-0 | 150.1745 | 0.20771 | -0.00021265 | 0 | 0 | 0 | 238.45 | 0.157 | 549.4 | 0.0909 |
| 131 | 2-Ethyl butanoic acid | C_{6} H_{12} O_{2} | 88-09-5 | 116.15828 | 0.2175 | -0.0002407 | 0 | 0 | 0 | 258.15 | 0.1554 | 516.5 | 0.0932 |
| 132 | Ethyl butyrate | C_{6} H_{12} O_{2} | 105-54-4 | 116.15828 | 0.21043 | -0.00024903 | 0 | 0 | 0 | 175.15 | 0.1668 | 453.15 | 0.0976 |
| 133 | Ethylcyclohexane | C_{8} H_{16} | 1678-91-7 | 112.21264 | 0.17662 | -0.0002014 | 0 | 0 | 0 | 161.84 | 0.144 | 404.94 | 0.0951 |
| 134 | Ethylcyclopentane | C_{7} H_{14} | 1640-89-7 | 98.18606 | 0.18334 | -0.0002228 | 0 | 0 | 0 | 134.71 | 0.1533 | 376.62 | 0.0994 |
| 135 | Ethylene | C_{2} H_{4} | 74-85-1 | 28.05316 | 0.4194 | -0.001591 | 0.000001306 | 0 | 0 | 104 | 0.2681 | 280 | 0.0763 |
| 136 | Ethylenediamine | C_{2} H_{8} N_{2} | 107-15-3 | 60.09832 | 0.36434 | -0.0004433 | 0 | 0 | 0 | 284.29 | 0.2383 | 390.41 | 0.1913 |
| 137 | Ethylene glycol | C_{2} H_{6} O_{2} | 107-21-1 | 62.06784 | 0.088067 | 0.00094712 | -1.31E-06 | 0 | 0 | 260.15 | 0.2457 | 470.45 | 0.2434 |
| 138 | Ethyleneimine | C_{2} H_{5} N | 151-56-4 | 43.0678 | 0.3097 | -0.0004023 | 0 | 0 | 0 | 195.2 | 0.2312 | 329 | 0.1773 |
| 139 | Ethylene oxide | C_{2} H_{4} O | 75-21-8 | 44.05256 | 0.26957 | -0.0003984 | 0 | 0 | 0 | 160.65 | 0.2056 | 283.85 | 0.1565 |
| 140 | Ethyl formate | C_{3} H_{6} O_{2} | 109-94-4 | 74.07854 | 0.2587 | -0.00033 | 0 | 0 | 0 | 193.55 | 0.1948 | 433.15 | 0.1158 |
| 141 | 2-Ethyl hexanoic acid | C_{8} H_{16} O_{2} | 149-57-5 | 144.211 | 0.20954 | -0.00022251 | 0 | 0 | 0 | 155.15 | 0.175 | 500.66 | 0.0981 |
| 142 | Ethylhexyl ether | C_{8} H_{18} O | 5756-43-4 | 130.22792 | 0.19356 | -0.00024102 | 0 | 0 | 0 | 180 | 0.1502 | 466.4 | 0.0812 |
| 143 | Ethylisopropyl ether | C_{5} H_{12} O | 625-54-7 | 88.14818 | 0.21928 | -0.00032568 | 0 | 0 | 0 | 140 | 0.1737 | 391.2 | 0.0919 |
| 144 | Ethylisopropyl ketone | C_{6} H_{12} O | 565-69-5 | 100.15888 | 0.22873 | -0.0002913 | 0 | 0 | 0 | 204.15 | 0.1693 | 450.1 | 0.0976 |
| 145 | Ethyl mercaptan | C_{2} H_{6} S | 75-08-1 | 62.13404 | 0.23392 | -0.0003206 | 0 | 0 | 0 | 125.26 | 0.1938 | 308.15 | 0.1351 |
| 146 | Ethyl propionate | C_{5} H_{10} O_{2} | 105-37-3 | 102.1317 | 0.2137 | -0.0002515 | 0 | 0 | 0 | 199.25 | 0.1636 | 495 | 0.0892 |
| 147 | Ethylpropyl ether | C_{5} H_{12} O | 628-32-0 | 88.14818 | 0.22717 | -0.0003298 | 0 | 0 | 0 | 145.65 | 0.1791 | 400.07 | 0.0952 |
| 148 | Ethyltrichlorosilane | C_{2} H_{5} Cl_{3} Si | 115-21-9 | 163.506 | 0.19653 | -0.00016907 | -1.67E-07 | 0 | 0 | 167.55 | 0.1635 | 371.05 | 0.1108 |
| 149 | Fluorine | F_{2} | 7782-41-4 | 37.9968064 | 0.2758 | -0.0016297 | 0 | 0 | 0 | 53.48 | 0.1886 | 130 | 0.0639 |
| 150 | Fluorobenzene | C_{6} H_{5} F | 462-06-6 | 96.1023032 | 0.20962 | -0.00028034 | 0 | 0 | 0 | 238.15 | 0.1429 | 353.15 | 0.1106 |
| 151 | Fluoroethane | C_{2} H_{5} F | 353-36-6 | 48.0595 | 0.25866 | -0.000498 | 0 | 0 | 0 | 129.95 | 0.1939 | 235.45 | 0.1414 |
| 152 | Fluoromethane | CH_{3} F | 593-53-3 | 34.03292 | 0.48162 | -0.0010709 | 0 | 0 | 0 | 131.35 | 0.341 | 194.82 | 0.273 |
| 153 | Formaldehyde | CH_{2} O | 50-00-0 | 30.02598 | 0.336003243 | -0.00054 | 0 | 0 | 0 | 155.15 | 0.2522 | 253.85 | 0.1989 |
| 154 | Formamide | CH_{3} NO | 75-12-7 | 45.04062 | 0.3847 | -0.0001065 | 0 | 0 | 0 | 275.7 | 0.3553 | 493 | 0.3322 |
| 155 | Formic acid | CH_{2} O_{2} | 64-18-6 | 46.0257 | 0.302 | -0.000108 | 0 | 0 | 0 | 281.45 | 0.2716 | 373.71 | 0.2616 |
| 156 | Furan | C_{4} H_{4} O | 110-00-9 | 68.07396 | 0.2198 | -0.00031405 | 0 | 0 | 0 | 187.55 | 0.1609 | 304.5 | 0.1242 |
| 157 | Helium-4 | He | 7440-59-7 | 4.0026 | -0.013833 | 0.022913 | -0.0054872 | 0.0004585 | 0 | 2.2 | 0.0149 | 4.8 | 0.0204 |
| 158 | Heptadecane | C_{17} H_{36} | 629-78-7 | 240.46774 | 0.20926 | -0.0002215 | 0 | 0 | 0 | 295.13 | 0.1439 | 575.3 | 0.0818 |
| 159 | Heptanal | C_{7} H_{14} O | 111-71-7 | 114.18546 | 0.22841 | -0.00026273 | 0 | 0 | 0 | 229.8 | 0.168 | 426.15 | 0.1164 |
| 160 | Heptane | C_{7} H_{16} | 142-82-5 | 100.20194 | 0.215 | -0.000303 | 0 | 0 | 0 | 182.57 | 0.1597 | 371.58 | 0.1024 |
| 161 | Heptanoic acid | C_{7} H_{14} O_{2} | 111-14-8 | 130.185 | 0.202 | -0.0002 | 0 | 0 | 0 | 265.83 | 0.1488 | 496.15 | 0.1028 |
| 162 | 1-Heptanol | C_{7} H_{16} O | 111-70-6 | 116.20134 | 0.234063 | -0.00025 | 0 | 0 | 0 | 239.15 | 0.1743 | 573.15 | 0.0908 |
| 163 | 2-Heptanol | C_{7} H_{16} O | 543-49-7 | 116.20134 | 0.21142 | -0.00024793 | 0 | 0 | 0 | 220 | 0.1569 | 432.9 | 0.1041 |
| 164 | 3-Heptanone | C_{7} H_{14} O | 106-35-4 | 114.18546 | 0.2026 | -0.0002234 | 0 | 0 | 0 | 234.15 | 0.1503 | 553.15 | 0.079 |
| 165 | 2-Heptanone | C_{7} H_{14} O | 110-43-0 | 114.18546 | 0.2108 | -0.000246 | 0 | 0 | 0 | 238.15 | 0.1522 | 424.05 | 0.1065 |
| 166 | 1-Heptene | C_{7} H_{14} | 592-76-7 | 98.18606 | 0.19664 | -0.00016623 | -2.52E-07 | 0 | 0 | 154.12 | 0.165 | 366.79 | 0.1017 |
| 167 | Heptyl mercaptan | C_{7} H_{16} S | 1639-09-4 | 132.26694 | 0.2037 | -0.0002252 | 0 | 0 | 0 | 229.92 | 0.1519 | 450.09 | 0.1023 |
| 168 | 1-Heptyne | C_{7} H_{12} | 628-71-7 | 96.17018 | 0.21098 | -0.00026652 | 0 | 0 | 0 | 192.22 | 0.1597 | 372.93 | 0.1116 |
| 169 | Hexadecane | C_{16} H_{34} | 544-76-3 | 226.44116 | 0.20749 | -0.00021917 | 0 | 0 | 0 | 291.31 | 0.1436 | 560.01 | 0.0848 |
| 170 | Hexanal | C_{6} H_{12} O | 66-25-1 | 100.15888 | 0.22832 | -0.00026482 | 0 | 0 | 0 | 214.93 | 0.1714 | 401.15 | 0.1221 |
| 171 | Hexane | C_{6} H_{14} | 110-54-3 | 86.17536 | 0.22492 | -0.0003533 | 0 | 0 | 0 | 177.83 | 0.1621 | 370 | 0.0942 |
| 172 | Hexanoic acid | C_{6} H_{12} O_{2} | 142-62-1 | 116.158 | 0.1855 | -0.000146 | 0 | 0 | 0 | 269.25 | 0.1462 | 603.15 | 0.0974 |
| 173 | 1-Hexanol | C_{6} H_{14} O | 111-27-3 | 102.17476 | 0.230656 | -0.00025 | 0 | 0 | 0 | 228.55 | 0.1735 | 575 | 0.0869 |
| 174 | 2-Hexanol | C_{6} H_{14} O | 626-93-7 | 102.175 | 0.21391 | -0.00026042 | 0 | 0 | 0 | 223 | 0.1558 | 412.4 | 0.1065 |
| 175 | 2-Hexanone | C_{6} H_{12} O | 591-78-6 | 100.15888 | 0.21076 | -0.00024 | 0 | 0 | 0 | 217.35 | 0.1586 | 400.85 | 0.1146 |
| 176 | 3-Hexanone | C_{6} H_{12} O | 589-38-8 | 100.15888 | 0.23493 | -0.0002912 | 0 | 0 | 0 | 217.5 | 0.1716 | 466 | 0.0992 |
| 177 | 1-Hexene | C_{6} H_{12} | 592-41-6 | 84.15948 | 0.19112 | -0.000083519 | -5.14E-07 | 0 | 0 | 133.39 | 0.1708 | 336.63 | 0.1048 |
| 178 | 3-Hexyne | C_{6} H_{10} | 928-49-4 | 82.1436 | 0.20996 | -0.0002692 | 0 | 0 | 0 | 170.05 | 0.1642 | 354.35 | 0.1146 |
| 179 | Hexyl mercaptan | C_{6} H_{14} S | 111-31-9 | 118.24036 | 0.2058 | -0.0002324 | 0 | 0 | 0 | 192.62 | 0.161 | 425.81 | 0.1068 |
| 180 | 1-Hexyne | C_{6} H_{10} | 693-02-7 | 82.1436 | 0.21492 | -0.0002899 | 0 | 0 | 0 | 141.25 | 0.174 | 344.48 | 0.1151 |
| 181 | 2-Hexyne | C_{6} H_{10} | 764-35-2 | 82.1436 | 0.2119 | -0.00027048 | 0 | 0 | 0 | 183.65 | 0.1622 | 357.67 | 0.1152 |
| 182 | Hydrazine | H_{4} N_{2} | 302-01-2 | 32.04516 | 1.3675 | -0.0015895 | 0 | 0 | 0 | 274.69 | 0.9309 | 623.15 | 0.377 |
| 183 | Hydrogen | H_{2} | 1333-74-0 | 2.01588 | -0.0917 | 0.017678 | -0.000382 | -3.33E-06 | 1.0266E-07 | 13.95 | 0.0754 | 31 | 0.0848 |
| 184 | Hydrogen bromide | BrH | 10035-10-6 | 80.91194 | 0.234 | -0.0004636 | 0 | 0 | 0 | 185.15 | 0.1482 | 290.62 | 0.0993 |
| 185 | Hydrogen chloride | ClH | 7647-01-0 | 36.46094 | 0.8045 | -0.002102 | 0 | 0 | 0 | 273.15 | 0.2303 | 323.15 | 0.1252 |
| 186 | Hydrogen cyanide | CHN | 74-90-8 | 27.02534 | 0.43454 | -0.0007008 | 0 | 0 | 0 | 259.83 | 0.2525 | 298.85 | 0.2251 |
| 187 | Hydrogen fluoride | FH | 7664-39-3 | 20.0063432 | 0.7516 | -0.0010874 | 0 | 0 | 0 | 189.79 | 0.5452 | 394.45 | 0.3227 |
| 188 | Hydrogen sulfide | H_{2} S | 7783-06-4 | 34.08088 | 0.4842 | -0.001184 | 0 | 0 | 0 | 193.15 | 0.2555 | 292.42 | 0.138 |
| 189 | Isobutyric acid | C_{4} H_{8} O_{2} | 79-31-2 | 88.10512 | 0.21668 | -0.0002556 | 0 | 0 | 0 | 227.15 | 0.1586 | 482.75 | 0.0933 |
| 190 | Isopropyl amine | C_{3} H_{9} N | 75-31-0 | 59.11026 | 0.237 | -0.000332 | 0 | 0 | 0 | 177.95 | 0.1779 | 305.55 | 0.1356 |
| 191 | Malonic acid | C_{3} H_{4} O_{4} | 141-82-2 | 104.06146 | 0.28231 | -0.00024019 | 0 | 0 | 0 | 409.15 | 0.184 | 580 | 0.143 |
| 192 | Methacrylic acid | C_{4} H_{6} O_{2} | 79-41-4 | 86.08924 | 0.2306 | -0.00025201 | 0 | 0 | 0 | 288.15 | 0.158 | 530 | 0.097 |
| 193 | Methane | CH_{4} | 74-82-8 | 16.0425 | 0.41768 | -0.0024528 | 3.5588E-06 | 0 | 0 | 90.69 | 0.2245 | 180 | 0.0915 |
| 194 | Methanol | CH_{4} O | 67-56-1 | 32.04186 | 0.2837 | -0.000281 | 0 | 0 | 0 | 175.47 | 0.2344 | 337.85 | 0.1888 |
| 195 | N-Methyl acetamide | C_{3} H_{7} NO | 79-16-3 | 73.09378 | 0.23743 | -0.0002362 | 0 | 0 | 0 | 301.15 | 0.1663 | 478.15 | 0.1245 |
| 196 | Methyl acetate | C_{3} H_{6} O_{2} | 79-20-9 | 74.07854 | 0.2777 | -0.000417 | 0 | 0 | 0 | 175.15 | 0.2047 | 386.15 | 0.1167 |
| 197 | Methyl acetylene | C_{3} H_{4} | 74-99-7 | 40.06386 | 0.23648 | -0.00041639 | 0 | 0 | 0 | 170.45 | 0.1655 | 249.94 | 0.1324 |
| 198 | Methyl acrylate | C_{4} H_{6} O_{2} | 96-33-3 | 86.08924 | 0.26082 | -0.0003506 | 0 | 0 | 0 | 196.32 | 0.192 | 421 | 0.1132 |
| 199 | Methyl amine | CH_{5} N | 74-89-5 | 31.0571 | 0.33446 | -0.00067427 | 8.033E-07 | 0 | 0 | 179.69 | 0.2392 | 283.15 | 0.2079 |
| 200 | Methyl benzoate | C_{8} H_{8} O_{2} | 93-58-3 | 136.14792 | 0.22142 | -0.00022759 | 0 | 0 | 0 | 260.75 | 0.1621 | 547.9 | 0.0967 |
| 201 | 3-Methyl-1,2-butadiene | C_{5} H_{8} | 598-25-4 | 68.11702 | 0.1983 | -0.0002822 | 0 | 0 | 0 | 159.53 | 0.1533 | 314 | 0.1097 |
| 202 | 2-Methylbutane | C_{5} H_{12} | 78-78-4 | 72.14878 | 0.21246 | -0.00033581 | 0 | 0 | 0 | 113.25 | 0.1744 | 368.13 | 0.0888 |
| 203 | 2-Methylbutanoic acid | C_{5} H_{10} O_{2} | 116-53-0 | 102.1317 | 0.22284 | -0.0002516 | 0 | 0 | 0 | 357.15 | 0.133 | 480.9 | 0.1018 |
| 204 | 3-Methyl-1-butanol | C_{5} H_{12} O | 123-51-3 | 88.1482 | 0.17471 | -0.0001256 | 0 | 0 | 0 | 155.95 | 0.1551 | 404.15 | 0.1239 |
| 205 | 2-Methyl-1-butene | C_{5} H_{10} | 563-46-2 | 70.1329 | 0.19447 | -0.0002901 | 0 | 0 | 0 | 135.58 | 0.1551 | 304.3 | 0.1062 |
| 206 | 2-Methyl-2-butene | C_{5} H_{10} | 513-35-9 | 70.1329 | 0.19636 | -0.000291 | 0 | 0 | 0 | 139.39 | 0.1558 | 311.7 | 0.1057 |
| 207 | 2-Methyl -1-butene-3-yne | C_{5} H_{6} | 78-80-8 | 66.10114 | 0.20385 | -0.0002874 | 0 | 0 | 0 | 160.15 | 0.1578 | 305.4 | 0.1161 |
| 208 | Methylbutyl ether | C_{5} H_{12} O | 628-28-4 | 88.14818 | 0.22235 | -0.0003044 | 0 | 0 | 0 | 157.48 | 0.1744 | 463.15 | 0.0814 |
| 209 | Methylbutyl sulfide | C_{5} H_{12} S | 628-29-5 | 104.214 | 0.20698 | -0.00024439 | 0 | 0 | 0 | 175.3 | 0.1641 | 396.58 | 0.1101 |
| 210 | 3-Methyl-1-butyne | C_{5} H_{8} | 598-23-2 | 68.11702 | 0.20348 | -0.0003106 | 0 | 0 | 0 | 183.45 | 0.1465 | 302.15 | 0.1096 |
| 211 | Methyl butyrate | C_{5} H_{10} O_{2} | 623-42-7 | 102.1317 | 0.21748 | -0.00025913 | 0 | 0 | 0 | 187.35 | 0.1689 | 493.15 | 0.0897 |
| 212 | Methylchlorosilane | CH_{5} ClSi | 993-00-0 | 80.5889 | 0.24683 | -0.00038854 | 0 | 0 | 0 | 139.05 | 0.1928 | 281.85 | 0.1373 |
| 213 | Methylcyclohexane | C_{7} H_{14} | 108-87-2 | 98.18606 | 0.1791 | -0.0002291 | 0 | 0 | 0 | 273.15 | 0.1165 | 374.08 | 0.0934 |
| 214 | 1-Methylcyclohexanol | C_{7} H_{14} O | 590-67-0 | 114.18546 | 0.21558 | -0.00022728 | 0 | 0 | 0 | 299.15 | 0.1476 | 548.8 | 0.0909 |
| 215 | cis-2-Methylcyclohexanol | C_{7} H_{14} O | 7443-70-1 | 114.18546 | 0.21839 | -0.00025776 | 0 | 0 | 0 | 280.15 | 0.1462 | 484.2 | 0.0936 |
| 216 | trans-2-Methylcyclohexanol | C_{7} H_{14} O | 7443-52-9 | 114.18546 | 0.21828 | -0.0002557 | 0 | 0 | 0 | 269.15 | 0.1495 | 484.8 | 0.0943 |
| 217 | Methylcyclopentane | C_{6} H_{12} | 96-37-7 | 84.15948 | 0.1929 | -0.0002492 | 0 | 0 | 0 | 130.73 | 0.1603 | 344.95 | 0.1069 |
| 218 | 1-Methylcyclopentene | C_{6} H_{10} | 693-89-0 | 82.1436 | 0.20023 | -0.00025581 | 0 | 0 | 0 | 146.62 | 0.1627 | 348.64 | 0.111 |
| 219 | 3-Methylcyclopentene | C_{6} H_{10} | 1120-62-3 | 82.1436 | 0.1994 | -0.00026149 | 0 | 0 | 0 | 168.54 | 0.1553 | 338.05 | 0.111 |
| 220 | Methyldichlorosilane | CH_{4} Cl_{2} Si | 75-54-7 | 115.03396 | 0.21956 | -0.00032153 | 0 | 0 | 0 | 182.55 | 0.1609 | 314.7 | 0.1184 |
| 221 | Methylethyl ether | C_{3} H_{8} O | 540-67-0 | 60.09502 | 0.27304 | -0.0004518 | 0 | 0 | 0 | 160 | 0.2008 | 341.34 | 0.1188 |
| 222 | Methylethyl ketone | C_{4} H_{8} O | 78-93-3 | 72.10572 | 0.2197 | -0.0002505 | 0 | 0 | 0 | 186.48 | 0.173 | 352.79 | 0.1313 |
| 223 | Methylethyl sulfide | C_{3} H_{8} S | 624-89-5 | 76.1606 | 0.22136 | -0.00028938 | 0 | 0 | 0 | 167.23 | 0.173 | 339.8 | 0.123 |
| 224 | Methyl formate | C_{2} H_{4} O_{2} | 107-31-3 | 60.05196 | 0.3246 | -0.000468 | 0 | 0 | 0 | 174.15 | 0.2431 | 373.15 | 0.15 |
| 225 | Methylisobutyl ether | C_{5} H_{12} O | 625-44-5 | 88.14818 | 0.222 | -0.00032217 | 0 | 0 | 0 | 188 | 0.1614 | 390 | 0.0964 |
| 226 | Methylisobutyl ketone | C_{6} H_{12} O | 108-10-1 | 100.15888 | 0.2301 | -0.00028899 | 0 | 0 | 0 | 189.15 | 0.1754 | 451.42 | 0.0996 |
| 227 | Methyl Isocyanate | C_{2} H_{3} NO | 624-83-9 | 57.05132 | 0.2822 | -0.00042037 | 0 | 0 | 0 | 256.15 | 0.1745 | 312 | 0.151 |
| 228 | Methylisopropyl ether | C_{4} H_{10} O | 598-53-8 | 74.1216 | 0.24154 | -0.0003774 | 0 | 0 | 0 | 127.93 | 0.1933 | 370 | 0.1019 |
| 229 | Methylisopropyl ketone | C_{5} H_{10} O | 563-80-4 | 86.1323 | 0.2332 | -0.0003044 | 0 | 0 | 0 | 180.15 | 0.1784 | 435.9 | 0.1005 |
| 230 | Methylisopropyl sulfide | C_{4} H_{10} S | 1551-21-9 | 90.1872 | 0.20978 | -0.00026468 | 0 | 0 | 0 | 171.64 | 0.1644 | 357.91 | 0.115 |
| 231 | Methyl mercaptan | CH_{4} S | 74-93-1 | 48.10746 | 0.26119 | -0.00038345 | 0 | 0 | 0 | 150.18 | 0.2036 | 279.11 | 0.1542 |
| 232 | Methyl methacrylate | C_{5} H_{8} O_{2} | 80-62-6 | 100.11582 | 0.2583 | -0.000379 | 0 | 0 | 0 | 290.15 | 0.1483 | 363.45 | 0.1206 |
| 233 | 2-Methyloctanoic acid | C_{9} H_{18} O_{2} | 3004-93-1 | 158.23802 | 0.20911 | -0.00021852 | 0 | 0 | 0 | 208.2 | 0.1636 | 555.2 | 0.0878 |
| 234 | 2-Methylpentane | C_{6} H_{14} | 107-83-5 | 86.17536 | 0.19334 | -0.00028038 | 0 | 0 | 0 | 119.55 | 0.1598 | 389.25 | 0.0842 |
| 235 | Methyl pentyl ether | C_{6} H_{14} O | 628-80-8 | 102.17476 | 0.21698 | -0.00028998 | 0 | 0 | 0 | 176 | 0.1659 | 432.3 | 0.0916 |
| 236 | 2-Methylpropane | C_{4} H_{10} | 75-28-5 | 58.1222 | 0.20455 | -0.00036589 | 0 | 0 | 0 | 113.54 | 0.163 | 400 | 0.0582 |
| 237 | 2-Methyl-2-propanol | C_{4} H_{10} O | 75-65-0 | 74.1216 | 0.21258 | -0.00029864 | 0 | 0 | 0 | 298.97 | 0.1233 | 404.96 | 0.0916 |
| 238 | 2-Methyl propene | C_{4} H_{8} | 115-11-7 | 56.10632 | 0.2802 | -0.000786 | 6.516E-07 | 0 | 0 | 132.81 | 0.1873 | 395.2 | 0.0713 |
| 239 | Methyl propionate | C_{4} H_{8} O_{2} | 554-12-1 | 88.10512 | 0.22534 | -0.0002683 | 0 | 0 | 0 | 185.65 | 0.1755 | 475 | 0.0979 |
| 240 | Methylpropyl ether | C_{4} H_{10} O | 557-17-5 | 74.1216 | 0.24817 | -0.0003774 | 0 | 0 | 0 | 133.97 | 0.1976 | 373 | 0.1074 |
| 241 | Methylpropyl sulfide | C_{4} H_{10} S | 3877-15-4 | 90.1872 | 0.21103 | -0.00025985 | 0 | 0 | 0 | 160.17 | 0.1694 | 368.69 | 0.1152 |
| 242 | Methylsilane | CH_{6} Si | 992-94-9 | 46.14384 | 0.2774 | -0.00054608 | 0 | 0 | 0 | 116.34 | 0.2139 | 216.25 | 0.1593 |
| 243 | alpha-Methyl styrene | C_{9} H_{10} | 98-83-9 | 118.1757 | 0.19657 | -0.0002118 | 0 | 0 | 0 | 249.95 | 0.1436 | 438.65 | 0.1037 |
| 244 | Methyl tert-butyl ether | C_{5} H_{12} O | 1634-04-4 | 88.1482 | 0.22526 | -0.00037235 | 1.1689E-07 | 0 | 0 | 164.55 | 0.1672 | 328.2 | 0.1156 |
| 245 | Methyl vinyl ether | C_{3} H_{6} O | 107-25-5 | 58.07914 | 0.28035 | -0.0004646 | 0 | 0 | 0 | 151.15 | 0.2101 | 341.1 | 0.1219 |
| 246 | Naphthalene | C_{10} H_{8} | 91-20-3 | 128.17052 | 0.17096 | -0.00010059 | 0 | 0 | 0 | 353.43 | 0.1354 | 646.97 | 0.1059 |
| 247 | Neon | Ne | 7440-01-9 | 20.1797 | 0.2971 | -0.017356 | 0.0005911 | -0.000007421 | 0 | 25 | 0.1167 | 44 | 0.0457 |
| 248 | Nitroethane | C_{2} H_{5} NO_{2} | 79-24-3 | 75.0666 | 0.247 | -0.0002814 | 0 | 0 | 0 | 183.63 | 0.1953 | 387.22 | 0.138 |
| 249 | Nitrogen | N_{2} | 7727-37-9 | 28.0134 | 0.2654 | -0.001677 | 0 | 0 | 0 | 63.15 | 0.1595 | 124 | 0.0575 |
| 250 | Nitrogen trifluoride | F_{3} N | 7783-54-2 | 71.00191 | 0 | 0 | 0 | 0 | 0 | 0 | 0 | 0 | 0 |
| 251 | Nitromethane | CH_{3} NO_{2} | 75-52-5 | 61.04002 | 0.3276 | -0.000405 | 0 | 0 | 0 | 244.6 | 0.2285 | 374.35 | 0.176 |
| 252 | Nitrous oxide | N_{2} O | 10024-97-2 | 44.0128 | 0.10112 | 0 | 0 | 0 | 0 | 277.59 | 0.1011 | 277.59 | 0.1011 |
| 253 | Nitric oxide | NO | 10102-43-9 | 30.0061 | 0.1878 | 0.0010293 | -0.00000943 | 0 | 0 | 110 | 0.1869 | 176.4 | 0.0759 |
| 254 | Nonadecane | C_{19} H_{40} | 629-92-5 | 268.5209 | 0.21229 | -0.00022 | 0 | 0 | 0 | 305.04 | 0.1452 | 603.05 | 0.0796 |
| 255 | Nonanal | C_{9} H_{18} O | 124-19-6 | 142.23862 | 0.21905 | -0.00024013 | 0 | 0 | 0 | 267.3 | 0.1549 | 465.52 | 0.1073 |
| 256 | Nonane | C_{9} H_{20} | 111-84-2 | 128.2551 | 0.209 | -0.000264 | 0 | 0 | 0 | 219.66 | 0.151 | 423.97 | 0.0971 |
| 257 | Nonanoic acid | C_{9} H_{18} O_{2} | 112-05-0 | 158.238 | 0.204 | -0.0002 | 0 | 0 | 0 | 285.55 | 0.1469 | 528.75 | 0.0983 |
| 258 | 1-Nonanol | C_{9} H_{20} O | 143-08-8 | 144.2545 | 0.240538 | -0.00025 | 0 | 0 | 0 | 268.15 | 0.1735 | 578.65 | 0.0959 |
| 259 | 2-Nonanol | C_{9} H_{20} O | 628-99-9 | 144.255 | 0.2081 | -0.00022869 | 0 | 0 | 0 | 238.15 | 0.1536 | 471.7 | 0.1002 |
| 260 | 1-Nonene | C_{9} H_{18} | 124-11-8 | 126.23922 | 0.20468 | -0.00025738 | 0 | 0 | 0 | 191.91 | 0.1553 | 420.02 | 0.0966 |
| 261 | Nonyl mercaptan | C_{9} H_{20} S | 1455-21-6 | 160.3201 | 0.20244 | -0.00021343 | 0 | 0 | 0 | 253.05 | 0.1484 | 492.95 | 0.0972 |
| 262 | 1-Nonyne | C_{9} H_{16} | 3452-09-3 | 124.22334 | 0.20954 | -0.00024588 | 0 | 0 | 0 | 223.15 | 0.1547 | 423.85 | 0.1053 |
| 263 | Octadecane | C_{18} H_{38} | 593-45-3 | 254.49432 | 0.2137 | -0.0002252 | 0 | 0 | 0 | 301.31 | 0.1458 | 589.86 | 0.0809 |
| 264 | Octanal | C_{8} H_{16} O | 124-13-0 | 128.212 | 0.22273 | -0.00025037 | 0 | 0 | 0 | 251.65 | 0.1597 | 445.15 | 0.1113 |
| 265 | Octane | C_{8} H_{18} | 111-65-9 | 114.22852 | 0.2156 | -0.00029483 | 0 | 0 | 0 | 216.38 | 0.1518 | 398.83 | 0.098 |
| 266 | Octanoic acid | C_{8} H_{16} O_{2} | 124-07-2 | 144.211 | 0.203 | -0.0002 | 0 | 0 | 0 | 289.65 | 0.1451 | 512.85 | 0.1004 |
| 267 | 1-Octanol | C_{8} H_{18} O | 111-87-5 | 130.22792 | 0.235281 | -0.00025 | 0 | 0 | 0 | 257.65 | 0.1709 | 570.15 | 0.0927 |
| 268 | 2-Octanol | C_{8} H_{18} O | 123-96-6 | 130.228 | 0.20955 | -0.00023733 | 0 | 0 | 0 | 241.55 | 0.1522 | 452.9 | 0.1021 |
| 269 | 2-Octanone | C_{8} H_{16} O | 111-13-7 | 128.21204 | 0.2132 | -0.0002494 | 0 | 0 | 0 | 252.85 | 0.1501 | 499 | 0.0888 |
| 270 | 3-Octanone | C_{8} H_{16} O | 106-68-3 | 128.21204 | 0.21732 | -0.00024969 | 0 | 0 | 0 | 255.55 | 0.1535 | 440.65 | 0.1073 |
| 271 | 1-Octene | C_{8} H_{16} | 111-66-0 | 112.21264 | 0.20467 | -0.0002675 | 0 | 0 | 0 | 171.45 | 0.1588 | 394.41 | 0.0992 |
| 272 | Octyl mercaptan | C_{8} H_{18} S | 111-88-6 | 146.29352 | 0.2012 | -0.0002142 | 0 | 0 | 0 | 223.95 | 0.1532 | 472.19 | 0.1001 |
| 273 | 1-Octyne | C_{8} H_{14} | 629-05-0 | 110.19676 | 0.2095 | -0.00025334 | 0 | 0 | 0 | 193.55 | 0.1605 | 399.35 | 0.1083 |
| 274 | Oxalic acid | C_{2} H_{2} O_{4} | 144-62-7 | 90.03488 | 0.26335 | -0.00022461 | 0 | 0 | 0 | 462.65 | 0.1594 | 516 | 0.1475 |
| 275 | Oxygen | O_{2} | 7782-44-7 | 31.9988 | 0.2741 | -0.00138 | 0 | 0 | 0 | 60 | 0.1913 | 150 | 0.0671 |
| 276 | Ozone | O_{3} | 10028-15-6 | 47.9982 | 0.17483 | 0.00075288 | -2.52E-06 | 0 | 0 | 77.35 | 0.218 | 161.85 | 0.2306 |
| 277 | Pentadecane | C_{15} H_{32} | 629-62-9 | 212.41458 | 0.20649 | -0.00021911 | 0 | 0 | 0 | 283.07 | 0.1445 | 543.84 | 0.0873 |
| 278 | Pentanal | C_{5} H_{10} O | 110-62-3 | 86.1323 | 0.23894 | -0.00029724 | 0 | 0 | 0 | 191.59 | 0.182 | 375.15 | 0.1274 |
| 279 | Pentane | C_{5} H_{12} | 109-66-0 | 72.14878 | 0.2537 | -0.000576 | 0.000000344 | 0 | 0 | 143.42 | 0.1782 | 445 | 0.0655 |
| 280 | Pentanoic acid | C_{5} H_{10} O_{2} | 109-52-4 | 102.132 | 0.1848 | -0.0001434 | 0 | 0 | 0 | 239.15 | 0.1505 | 458.65 | 0.119 |
| 281 | 1-Pentanol | C_{5} H_{12} O | 71-41-0 | 88.1482 | 0.223042 | -0.00025 | 0 | 0 | 0 | 273.15 | 0.1548 | 353.15 | 0.1348 |
| 282 | 2-Pentanol | C_{5} H_{12} O | 6032-29-7 | 88.1482 | 0.21875 | -0.00027849 | 0 | 0 | 0 | 200 | 0.1631 | 392.2 | 0.1095 |
| 283 | 2-Pentanone | C_{5} H_{10} O | 107-87-9 | 86.1323 | 0.2161 | -0.00024866 | 0 | 0 | 0 | 196.29 | 0.1673 | 375.46 | 0.1227 |
| 284 | 3-Pentanone | C_{5} H_{10} O | 96-22-0 | 86.1323 | 0.21569 | -0.00024081 | 0 | 0 | 0 | 234.18 | 0.1593 | 375.14 | 0.1254 |
| 285 | 1-Pentene | C_{5} H_{10} | 109-67-1 | 70.1329 | 0.21361 | -0.00030777 | 0 | 0 | 0 | 108.02 | 0.1804 | 303.22 | 0.1203 |
| 286 | 2-Pentyl mercaptan | C_{5} H_{12} S | 2084-19-7 | 104.21378 | 0.20597 | -0.00024518 | 0 | 0 | 0 | 160.75 | 0.1666 | 385.15 | 0.1115 |
| 287 | Pentyl mercaptan | C_{5} H_{12} S | 110-66-7 | 104.21378 | 0.2086 | -0.00024536 | 0 | 0 | 0 | 197.45 | 0.1602 | 399.79 | 0.1105 |
| 288 | 1-Pentyne | C_{5} H_{8} | 627-19-0 | 68.11702 | 0.22102 | -0.000322 | 0 | 0 | 0 | 167.45 | 0.1671 | 313.33 | 0.1201 |
| 289 | 2-Pentyne | C_{5} H_{8} | 627-21-4 | 68.11702 | 0.21282 | -0.0002856 | 0 | 0 | 0 | 163.83 | 0.166 | 329.27 | 0.1188 |
| 290 | Phenanthrene | C_{14} H_{10} | 85-01-8 | 178.2292 | 0.13753 | -0.000025247 | 0 | 0 | 0 | 372.38 | 0.1281 | 610.03 | 0.1221 |
| 291 | Phenol | C_{6} H_{6} O | 108-95-2 | 94.11124 | 0.18831 | -0.0001 | 0 | 0 | 0 | 314.06 | 0.1569 | 454.99 | 0.1428 |
| 292 | Phenyl isocyanate | C_{7} H_{5} NO | 103-71-9 | 119.1207 | 0.16326 | -0.00017777 | 0 | 0 | 0 | 243.15 | 0.12 | 439.43 | 0.0851 |
| 293 | Phthalic anhydride | C_{8} H_{4} O_{3} | 85-44-9 | 148.11556 | 0.22946 | -0.00021345 | 0 | 0 | 0 | 404.15 | 0.1432 | 557.65 | 0.1104 |
| 294 | Propadiene | C_{3} H_{4} | 463-49-0 | 40.06386 | 0.23081 | -0.0004078 | 0 | 0 | 0 | 136.87 | 0.175 | 238.65 | 0.1335 |
| 295 | Propane | C_{3} H_{8} | 74-98-6 | 44.09562 | 0.26755 | -0.00066457 | 2.774E-07 | 0 | 0 | 85.47 | 0.2128 | 350 | 0.0689 |
| 296 | 1-Propanol | C_{3} H_{8} O | 71-23-8 | 60.09502 | 0.23144 | -0.00025 | 0 | 0 | 0 | 200 | 0.1814 | 370.35 | 0.1389 |
| 297 | 2-Propanol | C_{3} H_{8} O | 67-63-0 | 60.095 | 0.20161 | -0.00021529 | 0 | 0 | 0 | 185.26 | 0.1617 | 425 | 0.1101 |
| 298 | Propenylcyclohexene | C_{9} H_{14} | 13511-13-2 | 122.20746 | 0.1831 | -0.00020275 | 0 | 0 | 0 | 199 | 0.1428 | 431.65 | 0.0956 |
| 299 | Propionaldehyde | C_{3} H_{6} O | 123-38-6 | 58.07914 | 0.31721 | -0.000528 | 0 | 0 | 0 | 165 | 0.2301 | 322.15 | 0.1471 |
| 300 | Propionic acid | C_{3} H_{6} O_{2} | 79-09-4 | 74.0785 | 0.1954 | -0.000164 | 0 | 0 | 0 | 252.45 | 0.154 | 543.15 | 0.1063 |
| 301 | Propionitrile | C_{3} H_{5} N | 107-12-0 | 55.0785 | 0.26743 | -0.00033418 | 0 | 0 | 0 | 180.37 | 0.2072 | 370.25 | 0.1437 |
| 302 | Propyl acetate | C_{5} H_{10} O_{2} | 109-60-4 | 102.1317 | 0.2332 | -0.0003096 | 0 | 0 | 0 | 178.15 | 0.178 | 434.82 | 0.0986 |
| 303 | Propyl amine | C_{3} H_{9} N | 107-10-8 | 59.11026 | 0.2632 | -0.0004278 | 0.000000412 | 0 | 0 | 188.36 | 0.1972 | 333.15 | 0.1664 |
| 304 | Propylbenzene | C_{9} H_{12} | 103-65-1 | 120.19158 | 0.18707 | -0.00019846 | 0 | 0 | 0 | 173.55 | 0.1526 | 583.15 | 0.0713 |
| 305 | Propylene | C_{3} H_{6} | 115-07-1 | 42.07974 | 0.24719 | -0.00048824 | 0 | 0 | 0 | 87.89 | 0.2043 | 340.49 | 0.081 |
| 306 | Propyl formate | C_{4} H_{8} O_{2} | 110-74-7 | 88.10512 | 0.2247 | -0.000264 | 0 | 0 | 0 | 180.25 | 0.1771 | 483.15 | 0.0972 |
| 307 | 2-Propyl mercaptan | C_{3} H_{8} S | 75-33-2 | 76.16062 | 0.21706 | -0.00028952 | 0 | 0 | 0 | 142.61 | 0.1758 | 325.71 | 0.1228 |
| 308 | Propyl mercaptan | C_{3} H_{8} S | 107-03-9 | 76.16062 | 0.2202 | -0.00028535 | 0 | 0 | 0 | 159.95 | 0.1746 | 340.87 | 0.1229 |
| 309 | 1,2-Propylene glycol | C_{3} H_{8} O_{2} | 57-55-6 | 76.09442 | 0.2152 | -0.0000497 | 0 | 0 | 0 | 213.15 | 0.2046 | 460.75 | 0.1923 |
| 310 | Quinone | C_{6} H_{4} O_{2} | 106-51-4 | 108.09476 | 0.26524 | -0.00028676 | 0 | 0 | 0 | 388.85 | 0.1537 | 545 | 0.109 |
| 311 | Silicon tetrafluoride | F_{4} Si | 7783-61-1 | 104.07911 | 0 | 0 | 0 | 0 | 0 | 0 | 0 | 0 | 0 |
| 312 | Styrene | C_{8} H_{8} | 100-42-5 | 104.14912 | 0.20215 | -0.0002201 | 0 | 0 | 0 | 242.54 | 0.1488 | 418.31 | 0.1101 |
| 313 | Succinic acid | C_{4} H_{6} O_{4} | 110-15-6 | 118.08804 | 0.27216 | -0.00023183 | 0 | 0 | 0 | 460.85 | 0.1653 | 591 | 0.1351 |
| 314 | Sulfur dioxide | O_{2} S | 7446-09-5 | 64.0638 | 0.38218 | -0.0006254 | 0 | 0 | 0 | 197.67 | 0.2586 | 400 | 0.132 |
| 315 | Sulfur hexafluoride | F_{6} S | 2551-62-4 | 146.0554192 | 0.2544 | -0.0006595 | 0 | 0 | 0 | 223.15 | 0.1072 | 318.69 | 0.0442 |
| 316 | Sulfur trioxide | O_{3} S | 7446-11-9 | 80.0632 | 0.92882 | -0.0030803 | 0.00000266 | 0 | 0 | 289.95 | 0.2593 | 481.47 | 0.0624 |
| 317 | Terephthalic acid | C_{8} H_{6} O_{4} | 100-21-0 | 166.13084 | 0.3063 | -0.00028541 | 0 | 0 | 0 | 700.15 | 0.1065 | 795.28 | 0.0793 |
| 318 | o-Terphenyl | C_{18} H_{14} | 84-15-1 | 230.30376 | 0.16853 | -0.00010817 | 0 | 0 | 0 | 329.35 | 0.1329 | 723.15 | 0.0903 |
| 319 | Tetradecane | C_{14} H_{30} | 629-59-4 | 198.388 | 0.20293 | -0.00021798 | 0 | 0 | 0 | 279.01 | 0.1421 | 526.73 | 0.0881 |
| 320 | Tetrahydrofuran | C_{4} H_{8} O | 109-99-9 | 72.10572 | 0.19428 | -0.000249 | 0 | 0 | 0 | 164.65 | 0.1533 | 339.12 | 0.1098 |
| 321 | 1,2,3,4-Tetrahydronaphthalene | C_{10} H_{12} | 119-64-2 | 132.20228 | 0.14563 | -0.0000536 | 0 | 0 | 0 | 237.38 | 0.1329 | 480.77 | 0.1199 |
| 322 | Tetrahydrothiophene | C_{4} H_{8} S | 110-01-0 | 88.17132 | 0.20414 | -0.00021217 | 0 | 0 | 0 | 176.98 | 0.1666 | 394.27 | 0.1205 |
| 323 | 2,2,3,3-Tetramethylbutane | C_{8} H_{18} | 594-82-1 | 114.22852 | 0.17835 | -0.00023704 | 0 | 0 | 0 | 373.96 | 0.0897 | 426 | 0.0774 |
| 324 | Thiophene | C_{4} H_{4} S | 110-02-1 | 84.13956 | 0.20571 | -0.00020028 | 0 | 0 | 0 | 234.94 | 0.1587 | 357.31 | 0.1341 |
| 325 | Toluene | C_{7} H_{8} | 108-88-3 | 92.13842 | 0.20463 | -0.00024252 | 0 | 0 | 0 | 178.18 | 0.1614 | 474.85 | 0.0895 |
| 326 | 1,1,2-Trichloroethane | C_{2} H_{3} Cl_{3} | 79-00-5 | 133.40422 | 0.20731 | -0.00024997 | 0 | 0 | 0 | 236.5 | 0.1482 | 482 | 0.0868 |
| 327 | Tridecane | C_{13} H_{28} | 629-50-5 | 184.36142 | 0.20447 | -0.00022612 | 0 | 0 | 0 | 267.76 | 0.1439 | 508.62 | 0.0895 |
| 328 | Triethyl amine | C_{6} H_{15} N | 121-44-8 | 101.19 | 0.1918 | -0.0002453 | 0 | 0 | 0 | 158.45 | 0.1529 | 483.15 | 0.0733 |
| 329 | Trimethyl amine | C_{3} H_{9} N | 75-50-3 | 59.11026 | 0.23813 | -0.00038397 | 0 | 0 | 0 | 156.08 | 0.1782 | 276.02 | 0.1321 |
| 330 | 1,2,3-Trimethylbenzene | C_{9} H_{12} | 526-73-8 | 120.19158 | 0.18854 | -0.0001963 | 0 | 0 | 0 | 247.79 | 0.1399 | 449.27 | 0.1003 |
| 331 | 1,2,4-Trimethylbenzene | C_{9} H_{12} | 95-63-6 | 120.19158 | 0.19216 | -0.0002105 | 0 | 0 | 0 | 229.33 | 0.1439 | 442.53 | 0.099 |
| 332 | 2,2,4-Trimethylpentane | C_{8} H_{18} | 540-84-1 | 114.22852 | 0.1659 | -0.00022686 | 0 | 0 | 0 | 165.78 | 0.1283 | 372.39 | 0.0814 |
| 333 | 2,3,3-Trimethylpentane | C_{8} H_{18} | 560-21-4 | 114.22852 | 0.16815 | -0.00020535 | 0 | 0 | 0 | 172.22 | 0.1328 | 387.91 | 0.0885 |
| 334 | 1,3,5-Trinitrobenzene | C_{6} H_{3} N_{3} O_{6} | 99-35-4 | 213.10452 | 0.18421 | -0.00016097 | 0 | 0 | 0 | 398.4 | 0.1201 | 629.6 | 0.0829 |
| 335 | 2,4,6-Trinitrotoluene | C_{7} H_{5} N_{3} O_{6} | 118-96-7 | 227.1311 | 0.19898 | -0.00017659 | 0 | 0 | 0 | 354 | 0.1365 | 625 | 0.0886 |
| 336 | Undecane | C_{11} H_{24} | 1120-21-4 | 156.30826 | 0.20515 | -0.00023933 | 0 | 0 | 0 | 247.57 | 0.1459 | 469.08 | 0.0929 |
| 337 | 1-Undecanol | C_{11} H_{24} O | 112-42-5 | 172.30766 | 0.218744 | -0.00025 | 0 | 0 | 0 | 281 | 0.1485 | 561.2 | 0.0784 |
| 338 | Vinyl acetate | C_{4} H_{6} O_{2} | 108-05-4 | 86.08924 | 0.256 | -0.0003542 | 0 | 0 | 0 | 180.35 | 0.1921 | 410 | 0.1108 |
| 339 | Vinyl acetylene | C_{4} H_{4} | 689-97-4 | 52.07456 | 0.22838 | -0.00035173 | 0 | 0 | 0 | 173.15 | 0.1675 | 278.25 | 0.1305 |
| 340 | Vinyl chloride | C_{2} H_{3} Cl | 75-01-4 | 62.49822 | 0.2333 | -0.00039223 | 0 | 0 | 0 | 119.36 | 0.1865 | 345.6 | 0.0978 |
| 341 | Vinyl trichlorosilane | C_{2} H_{3} Cl_{3} Si | 75-94-5 | 161.48972 | 0.21831 | -0.00029122 | 0 | 0 | 0 | 178.35 | 0.1664 | 434.52 | 0.0918 |
| 342 | Water | H_{2} O | 7732-18-5 | 18.01528 | -0.432 | 0.0057255 | -0.000008078 | 1.861E-09 | 0 | 273.16 | 0.5672 | 633.15 | 0.4272 |
| 343 | m-Xylene | C_{8} H_{10} | 108-38-3 | 106.165 | 0.20044 | -0.00023544 | 0 | 0 | 0 | 225.3 | 0.1474 | 413.1 | 0.1032 |
| 344 | o-Xylene | C_{8} H_{10} | 95-47-6 | 106.165 | 0.19989 | -0.0002299 | 0 | 0 | 0 | 247.98 | 0.1429 | 417.58 | 0.1039 |
| 345 | p-Xylene | C_{8} H_{10} | 106-42-3 | 106.165 | 0.20003 | -0.00023573 | 0 | 0 | 0 | 286.41 | 0.1325 | 413.1 | 0.1026 |

SHEET 3

| Eqn | Cmpd.  no. | Name | Formula | CAS | Mol. wt. | C1 | C2 | C3 | C4 | C5 | T_{min} K | C_{p} at  T_{min} × 1E-05 | T_{max} K | C_{p} at  T_{max} × 1E-05 | Tc |
| --- | --- | --- | --- | --- | --- | --- | --- | --- | --- | --- | --- | --- | --- | --- | --- |
| 100 | 1 | Acetaldehyde | C_{2} H_{4} O | 75-07-0 | 44.05256 | 152.99 | 598.64 | -0.89481 | 0 | 0 | 149.78 | 0.69743 | 294.15 | 0.9882 | 0 |
| 100 | 2 | Acetamide | C_{2} H_{5} NO | 60-35-5 | 59.0672 | 102300 | 128.7 | 0 | 0 | 0 | 354.15 | 1.4788 | 571 | 1.7579 |  |
| 100 | 3 | Acetic acid | C_{2} H_{4} O_{2} | 64-19-7 | 60.052 | 139640 | -320.8 | 0.8985 | 0 | 0 | 289.81 | 1.2213 | 391.05 | 1.5159 |  |
| 100 | 4 | Acetic anhydride | C_{4} H_{6} O_{3} | 108-24-7 | 102.08864 | 260050 | -565.43 | 1.1035 | 0 | 0 | 200.15 | 1.9109 | 412.7 | 2.1465 |  |
| 100 | 5 | Acetone | C_{3} H_{6} O | 67-64-1 | 58.07914 | 135600 | -177 | 0.2837 | 0.000689 | 0 | 178.45 | 1.1696 | 329.44 | 1.3271 |  |
| 100 | 6 | Acetonitrile | C_{2} H_{3} N | 75-05-8 | 41.0519 | 73381 | 60.042 | 0 | 0 | 0 | 229.32 | 0.8715 | 354.81 | 0.94685 |  |
| 100 | 7 | Acetylene | C_{2} H_{2} | 74-86-2 | 26.03728 | –122020 | 3082.7 | -15.895 | 0.027732 | 0 | 192.4 | 0.80208 | 250 | 0.8853 |  |
| 100 | 8 | Acrolein | C_{3} H_{4} O | 107-02-8 | 56.06326 | 103090 | -247.8 | 1.0343 | 0 | 0 | 253 | 1.066 | 379.5 | 1.5801 |  |
| 100 | 9 | Acrylic acid | C_{3} H_{4} O_{2} | 79-10-7 | 72.06266 | 55300 | 300 | 0 | 0 | 0 | 286.15 | 1.4115 | 375 | 1.678 |  |
| 100 | 10 | Acrylonitrile | C_{3} H_{3} N | 107-13-1 | 53.0626 | 109750 | -108.61 | 0.35246 | 0 | 0 | 189.63 | 1.0183 | 400 | 1.227 |  |
| 100 | 11 | Air | Mixture | 132259-10-0 | 28.96 | -214460 | 9185.1 | -106.12 | 0.41616 | 0 | 75 | 0.53065 | 115 | 0.71317 |  |
| 114 | 12 | Ammonia | H_{3} N | 7664-41-7 | 17.03052 | 61.289 | 80925 | 799.4 | -2651 | 0 | 203.15 | 0.75753 | 401.15 | 4.1847 | 405.65 |
| 100 | 13 | Anisole | C_{7} H_{8} O | 100-66-3 | 108.13782 | 150940 | 93.455 | 0.23602 | 0 | 0 | 298.15 | 1.9978 | 484.2 | 2.5153 |  |
| 100 | 14 | Argon | Ar | 7440-37-1 | 39.948 | 134390 | -1989.4 | 11.043 | 0 | 0 | 83.78 | 0.4523 | 135 | 0.6708 |  |
| 100 | 15 | Benzamide | C_{7} H_{7} NO | 55-21-0 | 121.13658 | 161440 | 260.66 | 0 | 0 | 0 | 403 | 2.6649 | 563.15 | 3.0823 |  |
| 100 | 16 | Benzene | C_{6} H_{6} | 71-43-2 | 78.11184 | 162940 | -344.94 | 0.85562 | 0 | 0 | 278.68 | 1.3326 | 500 | 2.0438 |  |
| 100 | 17 | Benzenethiol | C_{6} H_{6} S | 108-98-5 | 110.17684 | 119780 | 180.34 | 0 | 0 | 0 | 258.27 | 1.6636 | 442.29 | 1.9954 |  |
| 100 | 18 | Benzoic acid | C_{7} H_{6} O_{2} | 65-85-0 | 122.12134 | -5480 | 647.12 | 0 | 0 | 0 | 395.45 | 2.5042 | 450 | 2.8572 |  |
| 100 | 19 | Benzonitrile | C_{7} H_{5} N | 100-47-0 | 103.1213 | 66950 | 333.33 | 0 | 0 | 0 | 260.28 | 1.5371 | 464.15 | 2.2167 |  |
| 100 | 20 | Benzophenone | C_{13} H_{10} O | 119-61-9 | 182.2179 | 156130 | 454.49 | 0 | 0 | 0 | 321.35 | 3.0218 | 640 | 4.47 |  |
| 100 | 21 | Benzyl alcohol | C_{7} H_{8} O | 100-51-6 | 108.13782 | –334997 | 3644.21 | -7.77514 | 0.00591102 | 0 | 257.85 | 1.8906 | 478.6 | 2.7617 |  |
| 100 | 22 | Benzyl ethyl ether | C_{9} H_{12} O | 539-30-0 | 136.19098 | 87500 | 480 | 0 | 0 | 0 | 275.65 | 2.1981 | 458.15 | 3.0741 |  |
| 100 | 23 | Benzyl mercaptan | C_{7} H_{8} S | 100-53-8 | 124.20342 | 100320 | 346.89 | 0 | 0 | 0 | 243.95 | 1.8494 | 472.03 | 2.6406 |  |
| 100 | 24 | Biphenyl | C_{12} H_{10} | 92-52-4 | 154.2078 | 121770 | 429.3 | 0 | 0 | 0 | 342.2 | 2.6868 | 533.37 | 3.5075 |  |
| 100 | 25 | Bromine | Br_{2} | 7726-95-6 | 159.808 | 179400 | -667.11 | 1.0701 | 0 | 0 | 265.9 | 0.77675 | 331.9 | 0.75866 |  |
| 100 | 26 | Bromobenzene | C_{6} H_{5} Br | 108-86-1 | 157.0079 | 121600 | -9.45 | 0.358 | 0 | 0 | 293.15 | 1.496 | 495.08 | 2.0467 |  |
| 100 | 27 | Bromoethane | C_{2} H_{5} Br | 74-96-4 | 108.965 | 95588 | -110.94 | 0.41864 | 0 | 0 | 154.25 | 0.88436 | 311.49 | 1.0165 |  |
| 100 | 28 | Bromomethane | CH_{3} Br | 74-83-9 | 94.93852 | 102760 | -230.08 | 0.51796 | 0 | 0 | 179.44 | 0.78152 | 280.15 | 0.78955 |  |
| 100 | 29 | 12-Butadiene | C_{4} H_{6} | 590-19-2 | 54.09044 | 135150 | -311.14 | 0.97007 | -0.0001523 | 0 | 136.95 | 1.1034 | 290 | 1.2279 |  |
| 100 | 30 | 13-Butadiene | C_{4} H_{6} | 106-99-0 | 54.09044 | 128860 | -323.1 | 1.015 | 0.000032 | 0 | 165 | 1.0333 | 350 | 1.4148 |  |
| 100 | 31 | Butane | C_{4} H_{10} | 106-97-8 | 58.1222 | 191030 | -1675 | 12.5 | -0.03874 | 0.000046121 | 134.86 | 1.1272 | 400 | 2.2237 |  |
| 114 | 32 | 12-Butanediol | C_{4} H_{10} O_{2} | 584-03-2 | 90.121 | 55.136 | 314200 | 280.19 | 1413.9 | 0 | 220 | 1.559 | 670 | 5.2045 | 680 |
| 114 | 33 | 13-Butanediol | C_{4} H_{10} O_{2} | 107-88-0 | 90.121 | 42.152 | 324580 | 517.35 | 1449.5 | 0 | 196.15 | 0.62506 | 670 | 5.2437 | 676 |
| 100 | 34 | 1-Butanol | C_{4} H_{10} O | 71-36-3 | 74.1216 | 191200 | -730.4 | 2.2998 | 0 | 0 | 183.85 | 1.3465 | 391 | 2.5721 |  |
| 100 | 35 | 2-Butanol | C_{4} H_{10} O | 78-92-2 | 74.1216 | 533390 | -4986.2 | 18.908 | -0.02 | 0 | 158.45 | 1.3848 | 372.9 | 2.6621 |  |
| 100 | 36 | 1-Butene | C_{4} H_{8} | 106-98-9 | 56.10632 | 182050 | -1611 | 11.963 | -0.037454 | 0.000045027 | 87.8 | 1.1015 | 380 | 1.8103 |  |
| 100 | 37 | cis-2-Butene | C_{4} H_{8} | 590-18-1 | 56.10632 | 126680 | -65.47 | -0.64 | 0.002912 | 0 | 134.26 | 1.134 | 350 | 1.5022 |  |
| 100 | 38 | trans-2-Butene | C_{4} H_{8} | 624-64-6 | 56.10632 | 112760 | -104.7 | 0.5214 | 0 | 0 | 167.62 | 1.0986 | 274.03 | 1.2322 |  |
| 100 | 39 | Butyl acetate | C_{6} H_{12} O_{2} | 123-86-4 | 116.15828 | 111850 | 384.52 | 0 | 0 | 0 | 298.15 | 2.2649 | 399.26 | 2.6537 |  |
| 100 | 40 | Butylbenzene | C_{10} H_{14} | 104-51-8 | 134.21816 | 182470 | -13.912 | 0.72897 | 0 | 0 | 185.3 | 2.0492 | 400 | 2.9354 |  |
| 100 | 41 | Butyl mercaptan | C_{4} H_{10} S | 109-79-5 | 90.1872 | 232190 | -804.35 | 2.7063 | -0.0023017 | 0 | 157.46 | 1.6365 | 390 | 1.9359 |  |
| 100 | 42 | sec-Butyl mercaptan | C_{4} H_{10} S | 513-53-1 | 90.1872 | 197890 | -491.54 | 1.7219 | -0.0012499 | 0 | 133.02 | 1.6003 | 370 | 1.8844 |  |
| 100 | 43 | 1-Butyne | C_{4} H_{6} | 107-00-6 | 54.09044 | 136340 | -300.4 | 1.0216 | 0 | 0 | 147.43 | 1.1426 | 298.15 | 1.3759 |  |
| 100 | 44 | Butyraldehyde | C_{4} H_{8} O | 123-72-8 | 72.10572 | 194170 | -532.38 | 1.4286 | 0 | 0 | 176.8 | 1.447 | 347.94 | 1.8188 |  |
| 100 | 45 | Butyric acid | C_{4} H_{8} O_{2} | 107-92-6 | 88.1051 | 237700 | -746.4 | 1.829 | 0 | 0 | 267.95 | 1.6902 | 436.42 | 2.6031 |  |
| 100 | 46 | Butyronitrile | C_{4} H_{7} N | 109-74-0 | 69.1051 | 154800 | -239.75 | 0.68616 | 0 | 0 | 161.3 | 1.3398 | 390.74 | 1.6588 |  |
| 100 | 47 | Carbon dioxide | CO_{2} | 124-38-9 | 44.0095 | -8304300 | 104370 | -433.33 | 0.60052 | 0 | 220 | 0.78265 | 290 | 1.6603 |  |
| 100 | 48 | Carbon disulfide | CS_{2} | 75-15-0 | 76.1407 | 85600 | -122 | 0.5605 | -0.001452 | 0.000002008 | 161.11 | 0.75774 | 552 | 1.3125 |  |
| 114 | 49 | Carbon monoxide | CO | 630-08-0 | 28.0101 | 65.429 | 28723 | -847.39 | 1959.6 | 0 | 68.15 | 0.59115 | 132 | 6.4799 | 130.92 |
| 100 | 50 | Carbon tetrachloride | CCl_{4} | 56-23-5 | 153.8227 | -752700 | 8966.1 | -30.394 | 0.034455 | 0 | 250.33 | 1.2763 | 388.71 | 1.6374 |  |
| 100 | 51 | Carbon tetrafluoride | CF_{4} | 75-73-0 | 88.0043 | 104600 | -500.6 | 2.2851 | 0 | 0 | 89.56 | 0.78095 | 145.1 | 0.80073 |  |
| 100 | 52 | Chlorine | Cl_{2} | 7782-50-5 | 70.906 | 63936 | 46.35 | -0.1623 | 0 | 0 | 172.12 | 0.67106 | 239.12 | 0.65739 |  |
| 100 | 53 | Chlorobenzene | C_{6} H_{5} Cl | 108-90-7 | 112.5569 | -1307500 | 15338 | -53.974 | 0.063483 | 0 | 227.95 | 1.3617 | 360 | 1.8101 |  |
| 100 | 54 | Chloroethane | C_{2} H_{5} Cl | 75-00-3 | 64.5141 | 118380 | -248.915 | 0.68074 | 0 | 0 | 136.75 | 0.97071 | 298.15 | 1.0468 |  |
| 100 | 55 | Chloroform | CHCl_{3} | 67-66-3 | 119.37764 | 124850 | -166.34 | 0.43209 | 0 | 0 | 233.15 | 1.0956 | 366.48 | 1.2192 |  |
| 100 | 56 | Chloromethane | CH_{3} Cl | 74-87-3 | 50.4875 | 107900 | -330.13 | 0.808 | 0 | 0 | 175.43 | 0.74852 | 303.15 | 0.82076 |  |
| 100 | 57 | 1-Chloropropane | C_{3} H_{7} Cl | 540-54-5 | 78.54068 | 134733 | -176.332 | 0.55966 | 0 | 0 | 150.35 | 1.2087 | 319.67 | 1.3556 |  |
| 100 | 58 | 2-Chloropropane | C_{3} H_{7} Cl | 75-29-6 | 78.54068 | 69362 | 215.01 | 0 | 0 | 0 | 200 | 1.1236 | 308.85 | 1.3577 |  |
| 100 | 59 | m-Cresol | C_{7} H_{8} O | 108-39-4 | 108.13782 | -246700 | 3256.8 | -7.4202 | 0.0060467 | 0 | 285.39 | 2.1895 | 400 | 2.5578 |  |
| 100 | 60 | o-Cresol | C_{7} H_{8} O | 95-48-7 | 108.13782 | -185150 | 3148 | -8.0367 | 0.007254 | 0 | 304.2 | 2.3297 | 400 | 2.5243 |  |
| 100 | 61 | p-Cresol | C_{7} H_{8} O | 106-44-5 | 108.13782 | 259980 | -1112.3 | 4.9427 | -0.0054367 | 0 | 307.93 | 2.274 | 400 | 2.5794 |  |
| 100 | 62 | Cumene | C_{9} H_{12} | 98-82-8 | 120.19158 | 61723 | 494.81 | 0 | 0 | 0 | 177.14 | 1.4937 | 425.56 | 2.7229 |  |
| 100 | 63 | Cyanogen | C_{2} N_{2} | 460-19-5 | 52.0348 | 77461 | 111.51 | 0 | 0 | 0 | 245.25 | 1.0481 | 253.82 | 1.0576 |  |
| 100 | 64 | Cyclobutane | C_{4} H_{8} | 287-23-0 | 56.10632 | 101920 | -215.81 | 0.8103 | 0 | 0 | 190 | 0.90168 | 298.15 | 1.0961 |  |
| 100 | 65 | Cyclohexane | C_{6} H_{12} | 110-82-7 | 84.15948 | -220600 | 3118.3 | -9.4216 | 0.010687 | 0 | 279.69 | 1.4836 | 400 | 2.0323 |  |
| 100 | 66 | Cyclohexanol | C_{6} H_{12} O | 108-93-0 | 100.15888 | -40000 | 853 | 0 | 0 | 0 | 296.6 | 2.13 | 434 | 3.302 |  |
| 100 | 67 | Cyclohexanone | C_{6} H_{10} O | 108-94-1 | 98.143 | 6110.4 | 600.94 | 0 | 0 | 0 | 290 | 1.8038 | 489.75 | 3.0042 |  |
| 100 | 68 | Cyclohexene | C_{6} H_{10} | 110-83-8 | 82.1436 | 105850 | -60 | 0.68 | 0 | 0 | 169.67 | 1.1525 | 356.12 | 1.7072 |  |
| 100 | 69 | Cyclopentane | C_{5} H_{10} | 287-92-3 | 70.1329 | 122530 | -403.8 | 1.7344 | -0.0010975 | 0 | 179.28 | 0.99559 | 322.4 | 1.3584 |  |
| 100 | 70 | Cyclopentene | C_{5} H_{8} | 142-29-0 | 68.11702 | 125380 | -349.7 | 1.143 | 0 | 0 | 138.13 | 0.98884 | 317.38 | 1.2953 |  |
| 100 | 71 | Cyclopropane | C_{3} H_{6} | 75-19-4 | 42.07974 | 89952 | -196.63 | 0.65237 | 0 | 0 | 150 | 0.75136 | 298.15 | 0.89318 |  |
| 100 | 72 | Cyclohexyl mercaptan | C_{6} H_{12} S | 1569-69-3 | 116.22448 | 177560 | -179.12 | 0.76723 | 0 | 0 | 189.64 | 1.7118 | 431.95 | 2.4334 |  |
| 100 | 73 | Decanal | C_{10} H_{20} O | 112-31-2 | 156.2652 | 218480 | 374.14 | 0.11851 | 0 | 0 | 285 | 3.3474 | 481.65 | 4.2618 |  |
| 100 | 74 | Decane | C_{10} H_{22} | 124-18-5 | 142.28168 | 278620 | -197.91 | 1.0737 | 0 | 0 | 243.51 | 2.9409 | 460 | 4.1478 |  |
| 100 | 75 | Decanoic acid | C_{10} H_{20} O_{2} | 334-48-5 | 172.265 | 219840 | 140.41 | 0.9968 | 0 | 0 | 304.75 | 3.5521 | 543.15 | 5.9017 |  |
| 100 | 76 | 1-Decanol | C_{10} H_{22} O | 112-30-1 | 158.28108 | 4988500 | -52898 | 216.35 | -0.37538 | 0.00023674 | 280 | 3.5369 | 503.15 | 5.0174 |  |
| 100 | 77 | 1-Decene | C_{10} H_{20} | 872-05-9 | 140.2658 | 417440 | -1616.5 | 5.3948 | -0.004348 | 0 | 206.89 | 2.7541 | 494 | 4.1125 |  |
| 100 | 78 | Decyl mercaptan | C_{10} H_{22} S | 143-10-2 | 174.34668 | 314570 | -160.93 | 0.95561 | 0 | 0 | 247.56 | 3.333 | 512.35 | 4.8297 |  |
| 100 | 79 | 1-Decyne | C_{10} H_{18} | 764-93-2 | 138.24992 | 276900 | -371.23 | 1.5774 | 0 | 0 | 229.15 | 2.7466 | 447.15 | 4.2629 |  |
| 0 | 80 | Deuterium | D_{2} | 7782-39-0 | 4.0316 | 0 | 0 | 0 | 0 | 0 | 0 | 0 | 0 | 0 |  |
| 100 | 81 | 11-Dibromoethane | C_{2} H_{4} Br_{2} | 557-91-5 | 187.86116 | 149400 | -231.8 | 0.5946 | 0 | 0 | 210.15 | 1.2695 | 381.15 | 1.4743 |  |
| 100 | 82 | 12-Dibromoethane | C_{2} H_{4} Br_{2} | 106-93-4 | 187.86116 | 200560 | -491.44 | 0.9187 | 0 | 0 | 282.85 | 1.3506 | 410 | 1.535 |  |
| 100 | 83 | Dibromomethane | CH_{2} Br_{2} | 74-95-3 | 173.83458 | 202580 | -726.3 | 1.3377 | 0 | 0 | 240 | 1.0532 | 370.1 | 1.1701 |  |
| 100 | 84 | Dibutyl ether | C_{8} H_{18} O | 142-96-1 | 130.22792 | 270720 | -259.83 | 0.95427 | 0 | 0 | 175.3 | 2.545 | 450 | 3.4704 |  |
| 100 | 85 | m-Dichlorobenzene | C_{6} H_{4} Cl_{2} | 541-73-1 | 147.00196 | 114880 | 187.25 | 0 | 0 | 0 | 248.39 | 1.6139 | 400 | 1.8978 |  |
| 100 | 86 | o-Dichlorobenzene | C_{6} H_{4} Cl_{2} | 95-50-1 | 147.00196 | 93093 | 183.97 | 0.2314 | 0 | 0 | 273.15 | 1.6061 | 528.75 | 2.5506 |  |
| 100 | 87 | p-Dichlorobenzene | C_{6} H_{4} Cl_{2} | 106-46-7 | 147.00196 | 133950 | -24.84 | 0.48191 | 0 | 0 | 326.14 | 1.7711 | 513.56 | 2.4829 |  |
| 100 | 88 | 11-Dichloroethane | C_{2} H_{4} Cl_{2} | 75-34-3 | 98.95916 | 126340 | -94.63 | 0.32 | 0 | 0 | 176.19 | 1.196 | 330.45 | 1.3001 |  |
| 100 | 89 | 12-Dichloroethane | C_{2} H_{4} Cl_{2} | 107-06-2 | 98.95916 | 179170 | -444.74 | 0.93009 | 0 | 0 | 237.49 | 1.2601 | 356.59 | 1.3885 |  |
| 100 | 90 | Dichloromethane | CH_{2} Cl_{2} | 75-09-2 | 84.93258 | 98968 | -62.941 | 0.23265 | 0 | 0 | 180 | 0.95176 | 320 | 1.0265 |  |
| 100 | 91 | 11-Dichloropropane | C_{3} H_{6} Cl_{2} | 78-99-9 | 112.98574 | 144560 | -53.605 | 0.30617 | 0 | 0 | 192.5 | 1.4559 | 361.25 | 1.6515 |  |
| 100 | 92 | 12-Dichloropropane | C_{3} H_{6} Cl_{2} | 78-87-5 | 112.98574 | 111560 | 149.44 | 0 | 0 | 0 | 275 | 1.5266 | 369.52 | 1.6678 |  |
| 100 | 93 | Diethanol amine | C_{4} H_{11} NO_{2} | 111-42-2 | 105.13564 | 184200 | 286 | 0 | 0 | 0 | 301.15 | 2.7033 | 541.54 | 3.3908 |  |
| 100 | 94 | Diethyl amine | C_{4} H_{11} N | 109-89-7 | 73.13684 | 101330 | 243.18 | 0 | 0 | 0 | 223.35 | 1.5564 | 328.6 | 1.8124 |  |
| 100 | 95 | Diethyl ether | C_{4} H_{10} O | 60-29-7 | 74.1216 | 44400 | 1301 | -5.5 | 0.008763 | 0 | 156.92 | 1.4698 | 460 | 3.3202 |  |
| 100 | 96 | Diethyl sulfide | C_{4} H_{10} S | 352-93-2 | 90.1872 | 238520 | -1038.4 | 4.0587 | -0.0044691 | 0 | 181.95 | 1.5703 | 322.08 | 1.7579 |  |
| 114 | 97 | 11-Difluoroethane | C_{2} H_{4} F_{2} | 75-37-6 | 66.04997 | 67.155 | 105580 | 310.21 | -490.54 | 0 | 154.56 | 0.99146 | 359.98 | 1.6874 | 386.44 |
| 100 | 98 | 12-Difluoroethane | C_{2} H_{4} F_{2} | 624-72-6 | 66.04997 | 82577 | 109.85 | 0 | 0 | 0 | 179.6 | 1.0231 | 283.65 | 1.1374 |  |
| 100 | 99 | Difluoromethane | CH_{2} F_{2} | 75-10-5 | 52.02339 | 263980 | -1791.1 | 4.3666 | 0 | 0 | 200 | 0.80424 | 250 | 0.89118 |  |
| 100 | 100 | Diisopropyl amine | C_{6} H_{15} N | 108-18-9 | 101.19 | 98434 | 429.04 | 0 | 0 | 0 | 275 | 2.1642 | 357.05 | 2.5162 |  |
| 100 | 101 | Diisopropyl ether | C_{6} H_{14} O | 108-20-3 | 102.17476 | 163000 | -4.5 | 0.62 | 0 | 0 | 187.65 | 1.8399 | 341.45 | 2.3375 |  |
| 100 | 102 | Diisopropyl ketone | C_{7} H_{14} O | 565-80-0 | 114.18546 | 179270 | 28.37 | 0.5375 | 0 | 0 | 204.81 | 2.0763 | 410 | 2.8126 |  |
| 100 | 103 | 11-Dimethoxyethane | C_{4} H_{10} O_{2} | 534-15-6 | 90.121 | 187790 | -313.41 | 1.1023 | 0 | 0 | 159.95 | 1.6586 | 337.45 | 2.0755 |  |
| 100 | 104 | 12-Dimethoxypropane | C_{5} H_{12} O_{2} | 7778-85-0 | 104.14758 | 199930 | -191.5 | 0.87664 | 0 | 0 | 226.1 | 2.0145 | 366.15 | 2.4734 |  |
| 100 | 105 | Dimethyl acetylene | C_{4} H_{6} | 503-17-3 | 54.09044 | 88153 | 124.16 | 0 | 0 | 0 | 240.91 | 1.1806 | 300.13 | 1.2542 |  |
| 100 | 106 | Dimethyl amine | C_{2} H_{7} N | 124-40-3 | 45.08368 | -214870 | 3787.2 | -13.781 | 0.016924 | 0 | 180.96 | 1.1947 | 298.15 | 1.3779 |  |
| 100 | 107 | 23-Dimethylbutane | C_{6} H_{14} | 79-29-8 | 86.17536 | 129450 | 18.5 | 0.608 | 0 | 0 | 145.19 | 1.4495 | 331.13 | 2.0224 |  |
| 100 | 108 | 11-Dimethylcyclohexane | C_{8} H_{16} | 590-66-9 | 112.21264 | 134500 | 8.765 | 0.81151 | 0 | 0 | 239.66 | 1.8321 | 392.7 | 2.6309 |  |
| 100 | 109 | cis-12-Dimethylcyclohexane | C_{8} H_{16} | 2207-01-4 | 112.21264 | 150130 | -62.38 | 0.8851 | 0 | 0 | 223.16 | 1.8029 | 402.94 | 2.687 |  |
| 100 | 110 | trans-12-Dimethylcyclohexane | C_{8} H_{16} | 6876-23-9 | 112.21264 | 155560 | -145.26 | 1.0932 | 0 | 0 | 184.99 | 1.661 | 396.58 | 2.6989 |  |
| 100 | 111 | Dimethyl disulfide | C_{2} H_{6} S_{2} | 624-92-0 | 94.19904 | 171580 | -256.67 | 0.5727 | 0 | 0 | 188.44 | 1.4355 | 360 | 1.534 |  |
| 100 | 112 | Dimethyl ether | C_{2} H_{6} O | 115-10-6 | 46.06844 | 110100 | -157.47 | 0.51853 | 0 | 0 | 131.65 | 0.98356 | 250 | 1.0314 |  |
| 100 | 113 | NN-Dimethyl formamide | C_{3} H_{7} NO | 68-12-2 | 73.09378 | 147900 | -106 | 0.384 | 0 | 0 | 273.82 | 1.4767 | 466.44 | 1.82 |  |
| 100 | 114 | 23-Dimethylpentane | C_{7} H_{16} | 565-59-3 | 100.20194 | 146420 | 59.2 | 0.604 | 0 | 0 | 90 | 1.5664 | 380 | 2.5613 |  |
| 100 | 115 | Dimethyl phthalate | C_{10} H_{10} O_{4} | 131-11-3 | 194.184 | 206560 | 325.75 | 0 | 0 | 0 | 274.16 | 2.9587 | 360 | 3.2383 |  |
| 100 | 116 | Dimethylsilane | C_{2} H_{8} Si | 1111-74-6 | 60.17042 | 131810 | 0 | 0 | 0 | 0 | 298.15 | 1.3181 | 298.15 | 1.3181 |  |
| 100 | 117 | Dimethyl sulfide | C_{2} H_{6} S | 75-18-3 | 62.134 | 146950 | -380.06 | 1.2035 | -0.00084787 | 0 | 174.88 | 1.1276 | 310.48 | 1.1959 |  |
| 100 | 118 | Dimethyl sulfoxide | C_{2} H_{6} OS | 67-68-5 | 78.13344 | 240300 | -595 | 1.013 | 0 | 0 | 291.67 | 1.5293 | 422.15 | 1.6965 |  |
| 100 | 119 | Dimethyl terephthalate | C_{10} H_{10} O_{4} | 120-61-6 | 194.184 | 195251 | 419.918 | 0 | 0 | 0 | 413.79 | 3.6901 | 559.2 | 4.3007 |  |
| 100 | 120 | 14-Dioxane | C_{4} H_{8} O_{2} | 123-91-1 | 88.10512 | 956860 | -5559.9 | 9.6124 | 0 | 0 | 284.95 | 1.5306 | 374.47 | 2.2277 |  |
| 100 | 121 | Diphenyl ether | C_{12} H_{10} O | 101-84-8 | 170.2072 | 134160 | 447.67 | 0 | 0 | 0 | 300.03 | 2.6847 | 570 | 3.8933 |  |
| 100 | 122 | Dipropyl amine | C_{6} H_{15} N | 142-84-7 | 101.19 | 49120 | 562.24 | 0 | 0 | 0 | 277.9 | 2.0537 | 407.9 | 2.7846 |  |
| 100 | 123 | Dodecane | C_{12} H_{26} | 112-40-3 | 170.33484 | 508210 | -1368.7 | 3.1015 | 0 | 0 | 263.57 | 3.6292 | 433.15 | 4.9726 |  |
| 100 | 124 | Eicosane | C_{20} H_{42} | 112-95-8 | 282.54748 | 352720 | 807.32 | 0.2122 | 0 | 0 | 309.58 | 6.2299 | 616.93 | 9.3154 |  |
| 114 | 125 | Ethane | C_{2} H_{6} | 74-84-0 | 30.069 | 44.009 | 89718 | 918.77 | –1886 | 0 | 92 | 0.68554 | 290 | 1.2444 | 305.32 |
| 100 | 126 | Ethanol | C_{2} H_{6} O | 64-17-5 | 46.06844 | 102640 | -139.63 | -0.030341 | 0.0020386 | 0 | 159.05 | 0.87867 | 390 | 1.645 |  |
| 100 | 127 | Ethyl acetate | C_{4} H_{8} O_{2} | 141-78-6 | 88.10512 | 226230 | -624.8 | 1.472 | 0 | 0 | 189.6 | 1.6068 | 350.21 | 1.8796 |  |
| 100 | 128 | Ethyl amine | C_{2} H_{7} N | 75-04-7 | 45.08368 | 121700 | 38.993 | 0 | 0 | 0 | 192.15 | 1.2919 | 289.73 | 1.33 |  |
| 100 | 129 | Ethylbenzene | C_{8} H_{10} | 100-41-4 | 106.165 | 154040 | -142.29 | 0.80539 | 0 | 0 | 178.2 | 1.5426 | 409.35 | 2.3075 |  |
| 100 | 130 | Ethyl benzoate | C_{9} H_{10} O_{2} | 93-89-0 | 150.1745 | 124500 | 370.6 | 0 | 0 | 0 | 238.45 | 2.1287 | 486.55 | 3.0482 |  |
| 100 | 131 | 2-Ethyl butanoic acid | C_{6} H_{12} O_{2} | 88-09-5 | 116.15828 | 56359 | 603.02 | 0 | 0 | 0 | 258.15 | 2.1203 | 466.95 | 3.3794 |  |
| 100 | 132 | Ethyl butyrate | C_{6} H_{12} O_{2} | 105-54-4 | 116.15828 | 82434 | 422.45 | 0.20992 | 0 | 0 | 285.5 | 2.2015 | 428.25 | 3.0185 |  |
| 100 | 133 | Ethylcyclohexane | C_{8} H_{16} | 1678-91-7 | 112.21264 | 132360 | 72.74 | 0.64738 | 0 | 0 | 161.84 | 1.6109 | 404.95 | 2.6798 |  |
| 100 | 134 | Ethylcyclopentane | C_{7} H_{14} | 1640-89-7 | 98.18606 | 178520 | -518.35 | 2.3255 | -0.0016818 | 0 | 134.71 | 1.4678 | 301.82 | 1.8767 |  |
| 100 | 135 | Ethylene | C_{2} H_{4} | 74-85-1 | 28.05316 | 247390 | -4428 | 40.936 | -0.1697 | 0.00026816 | 104 | 0.70123 | 252.7 | 0.97582 |  |
| 100 | 136 | Ethylenediamine | C_{2} H_{8} N_{2} | 107-15-3 | 60.09832 | 184440 | -150.2 | 0.37044 | 0 | 0 | 284.29 | 1.7168 | 390.41 | 1.8226 |  |
| 100 | 137 | Ethylene glycol | C_{2} H_{6} O_{2} | 107-21-1 | 62.06784 | 35540 | 436.78 | -0.18486 | 0 | 0 | 260.15 | 1.3666 | 493.15 | 2.0598 |  |
| 100 | 138 | Ethyleneimine | C_{2} H_{5} N | 151-56-4 | 43.0678 | 46848 | 205.35 | 0 | 0 | 0 | 250 | 0.98186 | 329 | 1.1441 |  |
| 100 | 139 | Ethylene oxide | C_{2} H_{4} O | 75-21-8 | 44.05256 | 144710 | -758.87 | 2.8261 | -0.003064 | 0 | 160.65 | 0.83031 | 283.85 | 0.86932 |  |
| 100 | 140 | Ethyl formate | C_{3} H_{6} O_{2} | 109-94-4 | 74.07854 | 80000 | 223.6 | 0 | 0 | 0 | 254.2 | 1.3684 | 374.2 | 1.6367 |  |
| 100 | 141 | 2-Ethyl hexanoic acid | C_{8} H_{16} O_{2} | 149-57-5 | 144.211 | 207670 | -17.907 | 1.0493 | 0 | 0 | 155.15 | 2.3015 | 510.1 | 4.7157 |  |
| 100 | 142 | Ethylhexyl ether | C_{8} H_{18} O | 5756-43-4 | 130.22792 | 146040 | 458.22 | 0 | 0 | 0 | 298.15 | 2.8266 | 417.15 | 3.3719 |  |
| 100 | 143 | Ethylisopropyl ether | C_{5} H_{12} O | 625-54-7 | 88.14818 | 106250 | 292.15 | 0 | 0 | 0 | 298.15 | 1.9335 | 326.15 | 2.0153 |  |
| 100 | 144 | Ethylisopropyl ketone | C_{6} H_{12} O | 565-69-5 | 100.15888 | 229250 | -404.54 | 1.1382 | 0 | 0 | 204.15 | 1.941 | 386.55 | 2.4295 |  |
| 100 | 145 | Ethyl mercaptan | C_{2} H_{6} S | 75-08-1 | 62.13404 | 134670 | -234.39 | 0.59656 | 0 | 0 | 125.26 | 1.1467 | 315.25 | 1.2007 |  |
| 100 | 146 | Ethyl propionate | C_{5} H_{10} O_{2} | 105-37-3 | 102.1317 | 76330 | 400.1 | 0 | 0 | 0 | 298.15 | 1.9562 | 410 | 2.4037 |  |
| 100 | 147 | Ethylpropyl ether | C_{5} H_{12} O | 628-32-0 | 88.14818 | 103680 | 726.3 | -2.6047 | 0.0040957 | 0 | 145.65 | 1.6686 | 320 | 2.0358 |  |
| 100 | 148 | Ethyltrichlorosilane | C_{2} H_{5} Cl_{3} Si | 115-21-9 | 163.506 | 173110 | -697.18 | 3.7615 | -0.005289 | 1.6179E-06 | 167.55 | 1.3829 | 371.05 | 1.9277 |  |
| 100 | 149 | Fluorine | F_{2} | 7782-41-4 | 37.9968064 | -94585 | 7529.9 | -139.6 | 1.1301 | -0.0033241 | 58 | 0.55414 | 98 | 0.59663 |  |
| 100 | 150 | Fluorobenzene | C_{6} H_{5} F | 462-06-6 | 96.1023032 | 148640 | -202.58 | 0.66374 | 0 | 0 | 230.94 | 1.3726 | 504.08 | 2.1518 |  |
| 100 | 151 | Fluoroethane | C_{2} H_{5} F | 353-36-6 | 48.0595 | 65106 | 103.44 | 0.67161 | -0.0074083 | 0.000019119 | 129.95 | 0.79084 | 337.78 | 1.4005 |  |
| 100 | 152 | Fluoromethane | CH_{3} F | 593-53-3 | 34.03292 | 141790 | -814.32 | 2.2673 | 0 | 0 | 131.35 | 0.73946 | 285.7 | 0.94206 |  |
| 100 | 153 | Formaldehyde | CH_{2} O | 50-00-0 | 30.02598 | 70077 | -661.79 | 5.9749 | -0.01813 | 0.00001983 | 155.15 | 0.55005 | 253.85 | 0.72876 |  |
| 100 | 154 | Formamide | CH_{3} NO | 75-12-7 | 45.04062 | 63400 | 150.6 | 0 | 0 | 0 | 292 | 1.0738 | 493 | 1.3765 |  |
| 100 | 155 | Formic acid | CH_{2} O_{2} | 64-18-6 | 46.0257 | 78060 | 71.54 | 0 | 0 | 0 | 281.45 | 0.98195 | 380 | 1.0525 |  |
| 100 | 156 | Furan | C_{4} H_{4} O | 110-00-9 | 68.07396 | 114370 | -215.69 | 0.72691 | 0 | 0 | 187.55 | 0.99486 | 304.5 | 1.1609 |  |
| 100 | 157 | Helium-4 | He | 7440-59-7 | 4.0026 | 410430 | -464890 | 135100 | 0 | 0 | 1.8 | 0.11352 | 2.1 | 0.29952 |  |
| 100 | 158 | Heptadecane | C_{17} H_{36} | 629-78-7 | 240.46774 | 376970 | 347.82 | 0.57895 | 0 | 0 | 295.13 | 5.3005 | 575.3 | 7.6869 |  |
| 100 | 159 | Heptanal | C_{7} H_{14} O | 111-71-7 | 114.18546 | 176120 | 242.92 | 0 | 0 | 0 | 229.8 | 2.3194 | 426.15 | 2.7964 |  |
| 114 | 160 | Heptane | C_{7} H_{16} | 142-82-5 | 100.20194 | 61.26 | 314410 | 1824.6 | -2547.9 | 0 | 182.57 | 1.9989 | 520 | 4.0657 | 540.2 |
| 100 | 161 | Heptanoic acid | C_{7} H_{14} O_{2} | 111-14-8 | 130.185 | 194570 | -23.206 | 0.88395 | 0 | 0 | 265.83 | 2.5087 | 496.15 | 4.0065 |  |
| 100 | 162 | 1-Heptanol | C_{7} H_{16} O | 111-70-6 | 116.20134 | 2416800 | -26105 | 110.03 | -0.19172 | 0.00011968 | 239.15 | 2.359 | 448.6 | 3.8766 |  |
| 100 | 163 | 2-Heptanol | C_{7} H_{16} O | 543-49-7 | 116.20134 | 1070000 | -9470 | 33.004 | -0.0334 | 0 | 220 | 2.2835 | 432.9 | 4.4584 |  |
| 100 | 164 | 3-Heptanone | C_{7} H_{14} O | 106-35-4 | 114.18546 | 270730 | -399.89 | 1.0601 | 0 | 0 | 234.15 | 2.3522 | 480 | 3.2303 |  |
| 100 | 165 | 2-Heptanone | C_{7} H_{14} O | 110-43-0 | 114.18546 | 265040 | -375.68 | 1.0024 | 0 | 0 | 238.15 | 2.3242 | 490 | 3.2163 | 0 |
| 100 | 166 | 1-Heptene | C_{7} H_{14} | 592-76-7 | 98.18606 | 267950 | -1315.9 | 6.5242 | -0.011994 | 9.3808E-06 | 154.12 | 1.815 | 430 | 2.7554 | 0 |
| 100 | 167 | Heptyl mercaptan | C_{7} H_{16} S | 1639-09-4 | 132.26694 | 236870 | -158.01 | 0.78982 | 0 | 0 | 229.92 | 2.4229 | 460 | 3.3131 | 0 |
| 100 | 168 | 1-Heptyne | C_{7} H_{12} | 628-71-7 | 96.17018 | 46798 | 761.13 | -0.62882 | 0 | 0 | 200 | 1.7387 | 372.93 | 2.4319 | 0 |
| 100 | 169 | Hexadecane | C_{16} H_{34} | 544-76-3 | 226.44116 | 370350 | 231.47 | 0.68632 | 0 | 0 | 291.31 | 4.9602 | 560.01 | 7.1521 | 0 |
| 100 | 170 | Hexanal | C_{6} H_{12} O | 66-25-1 | 100.15888 | 157820 | 157.44 | 0 | 0 | 0 | 214.93 | 1.9166 | 401.15 | 2.2098 | 0 |
| 100 | 171 | Hexane | C_{6} H_{14} | 110-54-3 | 86.17536 | 172120 | -183.78 | 0.88734 | 0 | 0 | 177.83 | 1.675 | 460 | 2.7534 | 0 |
| 100 | 172 | Hexanoic acid | C_{6} H_{12} O_{2} | 142-62-1 | 116.158 | 161980 | 44.116 | 0.709 | 0 | 0 | 269.25 | 2.2526 | 478.85 | 3.4568 | 0 |
| 100 | 173 | 1-Hexanol | C_{6} H_{14} O | 111-27-3 | 102.17476 | 1638600 | -17261 | 71.721 | -0.12026 | 0.000071087 | 228.55 | 1.9821 | 460 | 3.5197 | 0 |
| 100 | 174 | 2-Hexanol | C_{6} H_{14} O | 626-93-7 | 102.175 | 1409400 | -12553 | 40.991 | -0.04 | 0 | 223 | 2.0494 | 412.4 | 3.985 | 0 |
| 100 | 175 | 2-Hexanone | C_{6} H_{12} O | 591-78-6 | 100.15888 | 208250 | -107.47 | 0.2062 | 0.00070293 | 0 | 217.35 | 2.0185 | 460 | 2.7087 | 0 |
| 100 | 176 | 3-Hexanone | C_{6} H_{12} O | 589-38-8 | 100.15888 | 235960 | -345.94 | 0.94278 | 0 | 0 | 217.5 | 2.0532 | 460 | 2.7632 | 0 |
| 100 | 177 | 1-Hexene | C_{6} H_{12} | 592-41-6 | 84.15948 | 164640 | -200.37 | 0.8784 | 0 | 0 | 133.39 | 1.5354 | 404 | 2.2706 | 0 |
| 100 | 178 | 3-Hexyne | C_{6} H_{10} | 928-49-4 | 82.1436 | 82795 | 283.4 | 0 | 0 | 0 | 300 | 1.6782 | 354.35 | 1.8322 | 0 |
| 100 | 179 | Hexyl mercaptan | C_{6} H_{14} S | 111-31-9 | 118.24036 | 303320 | -1009 | 3.3885 | -0.002762 | 0 | 192.62 | 2.1495 | 430 | 2.7639 | 0 |
| 100 | 180 | 1-Hexyne | C_{6} H_{10} | 693-02-7 | 82.1436 | 93000 | 326 | 0 | 0 | 0 | 200 | 1.582 | 344.48 | 2.053 | 0 |
| 100 | 181 | 2-Hexyne | C_{6} H_{10} | 764-35-2 | 82.1436 | 94860 | 254.15 | 0 | 0 | 0 | 300 | 1.7111 | 357.67 | 1.8576 | 0 |
| 100 | 182 | Hydrazine | H_{4} N_{2} | 302-01-2 | 32.04516 | 79815 | 50.929 | 0.043379 | 0 | 0 | 274.69 | 0.97078 | 653.15 | 1.3158 | 0 |
| 114 | 183 | Hydrogen | H_{2} | 1333-74-0 | 2.01588 | 66.653 | 6765.9 | -123.63 | 478.27 | 0 | 13.95 | 0.12622 | 32 | 1.3122 | 33.19 |
| 100 | 184 | Hydrogen bromide | BrH | 10035-10-6 | 80.91194 | 57720 | 9.9 | 0 | 0 | 0 | 185.15 | 0.59553 | 206.45 | 0.59764 | 0 |
| 100 | 185 | Hydrogen chloride | ClH | 7647-01-0 | 36.46094 | 47300 | 90 | 0 | 0 | 0 | 165 | 0.6215 | 185 | 0.6395 | 0 |
| 100 | 186 | Hydrogen cyanide | CHN | 74-90-8 | 27.02534 | 95398 | -197.52 | 0.3883 | 0 | 0 | 259.83 | 0.70291 | 298.85 | 0.71049 | 0 |
| 100 | 187 | Hydrogen fluoride | FH | 7664-39-3 | 20.0063432 | 62520 | -223.02 | 0.6297 | 0 | 0 | 189.79 | 0.42875 | 292.67 | 0.51186 | 0 |
| 114 | 188 | Hydrogen sulfide | H_{2} S | 7783-06-4 | 34.08088 | 64.666 | 49354 | 22.493 | -1623 | 0 | 187.68 | 0.67327 | 370 | 4.9183 | 373.53 |
| 100 | 189 | Isobutyric acid | C_{4} H_{8} O_{2} | 79-31-2 | 88.10512 | 127540 | -65.35 | 0.82867 | 0 | 0 | 270 | 1.7031 | 427.65 | 2.5114 | 0 |
| 100 | 190 | Isopropyl amine | C_{3} H_{9} N | 75-31-0 | 59.11026 | -32469 | 1977.1 | -7.0145 | 0.0086913 | 0 | 177.95 | 1.4621 | 320 | 1.6671 | 0 |
| 100 | 191 | Malonic acid | C_{3} H_{4} O_{4} | 141-82-2 | 104.06146 | 138790 | 121.24 | 0 | 0 | 0 | 409.15 | 1.884 | 580 | 2.0911 | 0 |
| 100 | 192 | Methacrylic acid | C_{4} H_{6} O_{2} | 79-41-4 | 86.08924 | 146290 | -58.59 | 0.3582 | 0 | 0 | 288.15 | 1.5915 | 434.15 | 1.8837 | 0 |
| 114 | 193 | Methane | CH_{4} | 74-82-8 | 16.0425 | 65.708 | 38883 | -257.95 | 614.07 | 0 | 90.69 | 0.53605 | 190 | 14.978 | 190.64 |
| 100 | 194 | Methanol | CH_{4} O | 67-56-1 | 32.04186 | 256040 | -2741.4 | 14.777 | -0.035078 | 0.000032719 | 175.47 | 0.71489 | 503.15 | 2.4646 | 0 |
| 100 | 195 | N-Methyl acetamide | C_{3} H_{7} NO | 79-16-3 | 73.09378 | 62600 | 243.4 | 0 | 0 | 0 | 359 | 1.4998 | 538.5 | 1.9367 | 0 |
| 100 | 196 | Methyl acetate | C_{3} H_{6} O_{2} | 79-20-9 | 74.07854 | 61260 | 270.9 | 0 | 0 | 0 | 253.4 | 1.2991 | 373.4 | 1.6241 | 0 |
| 100 | 197 | Methyl acetylene | C_{3} H_{4} | 74-99-7 | 40.06386 | 79791 | 89.49 | 0 | 0 | 0 | 200 | 0.97689 | 249.94 | 1.0216 | 0 |
| 100 | 198 | Methyl acrylate | C_{4} H_{6} O_{2} | 96-33-3 | 86.08924 | 275500 | -1147 | 2.568 | 0 | 0 | 196.32 | 1.493 | 353.35 | 1.9084 | 0 |
| 100 | 199 | Methyl amine | CH_{5} N | 74-89-5 | 31.0571 | 92520 | 37.45 | 0 | 0 | 0 | 179.69 | 0.99249 | 266.82 | 1.0251 | 0 |
| 100 | 200 | Methyl benzoate | C_{8} H_{8} O_{2} | 93-58-3 | 136.14792 | 125630 | 279.75 | 0 | 0 | 0 | 260.75 | 1.9857 | 472.65 | 2.5785 | 0 |
| 100 | 201 | 3-Methyl-12-butadiene | C_{5} H_{8} | 598-25-4 | 68.11702 | 135370 | -133.34 | 0.63868 | 0 | 0 | 159.53 | 1.3035 | 314.56 | 1.5662 | 0 |
| 100 | 202 | 2-Methylbutane | C_{5} H_{12} | 78-78-4 | 72.14878 | 108300 | 146 | -0.292 | 0.00151 | 0 | 113.25 | 1.2328 | 310 | 1.7048 | 0 |
| 100 | 203 | 2-Methylbutanoic acid | C_{5} H_{10} O_{2} | 116-53-0 | 102.1317 | 74200 | 417.4 | 0 | 0 | 0 | 321.5 | 2.0839 | 481.5 | 2.7518 | 0 |
| 100 | 204 | 3-Methyl-1-butanol | C_{5} H_{12} O | 123-51-3 | 88.1482 | 206600 | -761.14 | 2.5899 | 0 | 0 | 155.95 | 1.5089 | 404.15 | 3.2201 | 0 |
| 100 | 205 | 2-Methyl-1-butene | C_{5} H_{10} | 563-46-2 | 70.1329 | 149510 | -247.63 | 0.91849 | 0 | 0 | 135.58 | 1.3282 | 304.31 | 1.5921 | 0 |
| 100 | 206 | 2-Methyl-2-butene | C_{5} H_{10} | 513-35-9 | 70.1329 | 151600 | -266.72 | 0.90847 | 0 | 0 | 139.39 | 1.3207 | 311.71 | 1.5673 | 0 |
| 100 | 207 | 2-Methyl -1-butene-3-yne | C_{5} H_{6} | 78-80-8 | 66.10114 | 81919 | 181.01 | 0 | 0 | 0 | 298.15 | 1.3589 | 305.4 | 1.372 | 0 |
| 100 | 208 | Methylbutyl ether | C_{5} H_{12} O | 628-28-4 | 88.14818 | 177850 | -171.57 | 0.74379 | 0 | 0 | 157.48 | 1.6928 | 343.31 | 2.0661 | 0 |
| 100 | 209 | Methylbutyl sulfide | C_{5} H_{12} S | 628-29-5 | 104.214 | 198390 | -220.35 | 0.76096 | 0 | 0 | 175.3 | 1.8315 | 510 | 2.8394 | 0 |
| 100 | 210 | 3-Methyl-1-butyne | C_{5} H_{8} | 598-23-2 | 68.11702 | 105200 | 191.1 | 0 | 0 | 0 | 200 | 1.4342 | 299.49 | 1.6243 | 0 |
| 100 | 211 | Methyl butyrate | C_{5} H_{10} O_{2} | 623-42-7 | 102.1317 | 102930 | 129.1 | 0.62516 | 0 | 0 | 277.25 | 1.8678 | 415.87 | 2.6474 | 0 |
| 100 | 212 | Methylchlorosilane | CH_{5} ClSi | 993-00-0 | 80.5889 | 47726 | 338.4 | 0 | 0 | 0 | 250 | 1.3233 | 325 | 1.5771 | 0 |
| 100 | 213 | Methylcyclohexane | C_{7} H_{14} | 108-87-2 | 98.18606 | 131340 | -63.1 | 0.8125 | 0 | 0 | 146.58 | 1.3955 | 320 | 1.9435 | 0 |
| 100 | 214 | 1-Methylcyclohexanol | C_{7} H_{14} O | 590-67-0 | 114.18546 | 50578 | 508.59 | 0 | 0 | 0 | 300 | 2.0316 | 441.15 | 2.7494 | 0 |
| 100 | 215 | cis-2-Methylcyclohexanol | C_{7} H_{14} O | 7443-70-1 | 114.18546 | 118600 | 447.07 | 0 | 0 | 0 | 300 | 2.5272 | 438.15 | 3.1448 | 0 |
| 100 | 216 | trans-2-Methylcyclohexanol | C_{7} H_{14} O | 7443-52-9 | 114.18546 | 118170 | 447.99 | 0 | 0 | 0 | 300 | 2.5257 | 440.15 | 3.1535 | 0 |
| 100 | 217 | Methylcyclopentane | C_{6} H_{12} | 96-37-7 | 84.15948 | 155920 | -490 | 2.1383 | -0.0015585 | 0 | 130.73 | 1.2492 | 366.48 | 1.8682 | 0 |
| 100 | 218 | 1-Methylcyclopentene | C_{6} H_{10} | 693-89-0 | 82.1436 | 53271 | 327.92 | 0 | 0 | 0 | 200 | 1.1886 | 348.64 | 1.676 | 0 |
| 100 | 219 | 3-Methylcyclopentene | C_{6} H_{10} | 1120-62-3 | 82.1436 | 46457 | 346.93 | 0 | 0 | 0 | 200 | 1.1584 | 338.05 | 1.6374 | 0 |
| 100 | 220 | Methyldichlorosilane | CH_{4} Cl_{2} Si | 75-54-7 | 115.03396 | 27030 | 413 | 0 | 0 | 0 | 250 | 1.3028 | 350 | 1.7158 | 0 |
| 100 | 221 | Methylethyl ether | C_{3} H_{8} O | 540-67-0 | 60.09502 | 85383 | 199.08 | -0.061547 | 0 | 0 | 160 | 1.1566 | 280.5 | 1.3638 | 0 |
| 100 | 222 | Methylethyl ketone | C_{4} H_{8} O | 78-93-3 | 72.10572 | 132300 | 200.87 | -0.9597 | 0.0019533 | 0 | 186.48 | 1.4905 | 373.15 | 1.7511 | 0 |
| 100 | 223 | Methylethyl sulfide | C_{3} H_{8} S | 624-89-5 | 76.1606 | 161240 | -288.61 | 0.78179 | 0 | 0 | 167.23 | 1.3484 | 339.8 | 1.5344 | 0 |
| 100 | 224 | Methyl formate | C_{2} H_{4} O_{2} | 107-31-3 | 60.05196 | 130200 | -396 | 1.21 | 0 | 0 | 174.15 | 0.97934 | 304.9 | 1.2195 | 0 |
| 100 | 225 | Methylisobutyl ether | C_{5} H_{12} O | 625-44-5 | 88.14818 | 92919 | 324.43 | 0 | 0 | 0 | 298.15 | 1.8965 | 350 | 2.0647 | 0 |
| 100 | 226 | Methylisobutyl ketone | C_{6} H_{12} O | 108-10-1 | 100.15888 | 183650 | -79.862 | 0.60769 | 0 | 0 | 189.15 | 1.9029 | 389.15 | 2.446 | 0 |
| 100 | 227 | Methyl Isocyanate | C_{2} H_{3} NO | 624-83-9 | 57.05132 | 149770 | -529.82 | 1.3499 | 0 | 0 | 256.15 | 1.0263 | 366 | 1.3668 | 0 |
| 100 | 228 | Methylisopropyl ether | C_{4} H_{10} O | 598-53-8 | 74.1216 | 143440 | -154.07 | 0.7255 | 0 | 0 | 127.93 | 1.356 | 310 | 1.654 | 0 |
| 100 | 229 | Methylisopropyl ketone | C_{5} H_{10} O | 563-80-4 | 86.1323 | 191170 | -331.04 | 0.98445 | 0 | 0 | 180.15 | 1.6348 | 440 | 2.361 | 0 |
| 100 | 230 | Methylisopropyl sulfide | C_{4} H_{10} S | 1551-21-9 | 90.1872 | 211170 | -661.97 | 2.4216 | -0.0021383 | 0 | 171.64 | 1.5808 | 357.91 | 1.8641 | 0 |
| 100 | 231 | Methyl mercaptan | CH_{4} S | 74-93-1 | 48.10746 | 115300 | -263.23 | 0.60412 | 0 | 0 | 150.18 | 0.89393 | 298.15 | 0.9052 | 0 |
| 100 | 232 | Methyl methacrylate | C_{5} H_{8} O_{2} | 80-62-6 | 100.11582 | 255100 | -938.4 | 2.413 | 0 | 0 | 224.95 | 1.6611 | 373.45 | 2.4118 | 0 |
| 100 | 233 | 2-Methyloctanoic acid | C_{9} H_{18} O_{2} | 3004-93-1 | 158.23802 | 226650 | 15.421 | 1.0578 | 0 | 0 | 240 | 2.9128 | 518.15 | 5.1864 | 0 |
| 100 | 234 | 2-Methylpentane | C_{6} H_{14} | 107-83-5 | 86.17536 | 142220 | -47.83 | 0.739 | 0 | 0 | 119.55 | 1.4706 | 333.41 | 2.0842 | 0 |
| 100 | 235 | Methyl pentyl ether | C_{6} H_{14} O | 628-80-8 | 102.17476 | 251890 | -468.32 | 1.2209 | 0 | 0 | 176 | 2.0728 | 372 | 2.4663 | 0 |
| 100 | 236 | 2-Methylpropane | C_{4} H_{10} | 75-28-5 | 58.1222 | 172370 | -1783.9 | 14.759 | -0.047909 | 0.00005805 | 113.54 | 0.99613 | 380 | 2.0725 | 0 |
| 100 | 237 | 2-Methyl-2-propanol | C_{4} H_{10} O | 75-65-0 | 74.1216 | -925460 | 7894.9 | -17.661 | 0.013617 | 0 | 298.96 | 2.2016 | 460 | 2.9455 | 0 |
| 100 | 238 | 2-Methyl propene | C_{4} H_{8} | 115-11-7 | 56.10632 | 87680 | 217.1 | -0.9153 | 0.002266 | 0 | 132.81 | 1.0568 | 343.15 | 1.4596 | 0 |
| 100 | 239 | Methyl propionate | C_{4} H_{8} O_{2} | 554-12-1 | 88.10512 | 71140 | 335.5 | 0 | 0 | 0 | 300 | 1.7179 | 390 | 2.0199 | 0 |
| 100 | 240 | Methylpropyl ether | C_{4} H_{10} O | 557-17-5 | 74.1216 | 144110 | -102.09 | 0.58113 | 0 | 0 | 133.97 | 1.4086 | 312.2 | 1.6888 | 0 |
| 100 | 241 | Methylpropyl sulfide | C_{4} H_{10} S | 3877-15-4 | 90.1872 | 179850 | -264.1 | 0.79202 | 0 | 0 | 160.17 | 1.5787 | 368.69 | 1.9014 | 0 |
| 100 | 242 | Methylsilane | CH_{6} Si | 992-94-9 | 46.14384 | 113470 | 0 | 0 | 0 | 0 | 298.15 | 1.1347 | 298.15 | 1.1347 | 0 |
| 100 | 243 | alpha-Methyl styrene | C_{9} H_{10} | 98-83-9 | 118.1757 | 76822 | 421.6 | 0 | 0 | 0 | 249.95 | 1.822 | 438.65 | 2.6176 | 0 |
| 100 | 244 | Methyl tert-butyl ether | C_{5} H_{12} O | 1634-04-4 | 88.1482 | 134580 | 90.833 | 0.011456 | 0.00095984 | 0 | 164.55 | 1.5411 | 328.2 | 1.9956 | 0 |
| 100 | 245 | Methyl vinyl ether | C_{3} H_{6} O | 107-25-5 | 58.07914 | 73600 | 184.7 | 0 | 0 | 0 | 151.15 | 1.0152 | 278.65 | 1.2507 | 0 |
| 100 | 246 | Naphthalene | C_{10} H_{8} | 91-20-3 | 128.17052 | 29800 | 527.5 | 0 | 0 | 0 | 353.43 | 2.1623 | 491.14 | 2.8888 | 0 |
| 100 | 247 | Neon | Ne | 7440-01-9 | 20.1797 | 1034100 | -138770 | 7154 | -162.55 | 1.3841 | 24.56 | 0.36664 | 40 | 0.69796 | 0 |
| 100 | 248 | Nitroethane | C_{2} H_{5} NO_{2} | 79-24-3 | 75.0666 | 187740 | -497.6 | 1.0691 | 0 | 0 | 183.63 | 1.3242 | 387.22 | 1.5536 | 0 |
| 100 | 249 | Nitrogen | N_{2} | 7727-37-9 | 28.0134 | 281970 | -12281 | 248 | -2.2182 | 0.0074902 | 63.15 | 0.55925 | 112 | 0.79596 | 0 |
| 100 | 250 | Nitrogen trifluoride | F_{3} N | 7783-54-2 | 71.00191 | 101400 | -682.11 | 3.8912 | 0 | 0 | 117 | 0.7486 | 175.5 | 1.0154 | 0 |
| 100 | 251 | Nitromethane | CH_{3} NO_{2} | 75-52-5 | 61.04002 | 116270 | -135.3 | 0.345 | 0 | 0 | 244.6 | 1.0382 | 473.15 | 1.2949 | 0 |
| 100 | 252 | Nitrous oxide | N_{2} O | 10024-97-2 | 44.0128 | 67556 | 54.373 | 0 | 0 | 0 | 182.3 | 0.77468 | 200 | 0.78431 | 0 |
| 100 | 253 | Nitric oxide | NO | 10102-43-9 | 30.0061 | –2979600 | 76602 | -652.59 | 1.8879 | 0 | 109.5 | 0.62287 | 150 | 1.9909 | 0 |
| 100 | 254 | Nonadecane | C_{19} H_{40} | 629-92-5 | 268.5209 | 342570 | 762.08 | 0.20481 | 0 | 0 | 305.04 | 5.9409 | 603.05 | 8.7663 | 0 |
| 100 | 255 | Nonanal | C_{9} H_{18} O | 124-19-6 | 142.23862 | 195220 | 378.71 | 0.029716 | 0 | 0 | 267.3 | 2.9857 | 465.52 | 3.7796 | 0 |
| 100 | 256 | Nonane | C_{9} H_{20} | 111-84-2 | 128.2551 | 383080 | -1139.8 | 2.7101 | 0 | 0 | 219.66 | 2.6348 | 325 | 2.989 | 0 |
| 100 | 257 | Nonanoic acid | C_{9} H_{18} O_{2} | 112-05-0 | 158.238 | 224336 | 49.726 | 0.9813 | 0 | 0 | 285.55 | 3.1855 | 528.75 | 5.2498 | 0 |
| 100 | 258 | 1-Nonanol | C_{9} H_{20} O | 143-08-8 | 144.2545 | 10483000 | -115220 | 476.87 | -0.85381 | 0.00056246 | 310 | 3.5059 | 460 | 4.6494 | 0 |
| 100 | 259 | 2-Nonanol | C_{9} H_{20} O | 628-99-9 | 144.255 | 1510000 | -12600 | 40.7 | -0.0386 | 0 | 238.15 | 2.9627 | 471.7 | 5.7115 | 0 |
| 100 | 260 | 1-Nonene | C_{9} H_{18} | 124-11-8 | 126.23922 | 254490 | -298.06 | 1.1707 | 0 | 0 | 191.91 | 2.4041 | 475 | 3.7705 | 0 |
| 100 | 261 | Nonyl mercaptan | C_{9} H_{20} S | 1455-21-6 | 160.3201 | 265350 | -46.22 | 0.79154 | 0 | 0 | 253.05 | 3.0434 | 492.95 | 4.3491 | 0 |
| 100 | 262 | 1-Nonyne | C_{9} H_{16} | 3452-09-3 | 124.22334 | 253580 | -366.3 | 1.4881 | 0 | 0 | 223.15 | 2.4594 | 423.85 | 3.6566 | 0 |
| 100 | 263 | Octadecane | C_{18} H_{38} | 593-45-3 | 254.49432 | 399430 | 374.64 | 0.58156 | 0 | 0 | 301.31 | 5.6511 | 589.86 | 8.2276 | 0 |
| 100 | 264 | Octanal | C_{8} H_{16} O | 124-13-0 | 128.212 | 171960 | 383.28 | -0.059074 | 0 | 0 | 251.65 | 2.6467 | 445.15 | 3.3087 | 0 |
| 100 | 265 | Octane | C_{8} H_{18} | 111-65-9 | 114.22852 | 224830 | -186.63 | 0.95891 | 0 | 0 | 216.38 | 2.2934 | 460 | 3.4189 | 0 |
| 100 | 266 | Octanoic acid | C_{8} H_{16} O_{2} | 124-07-2 | 144.211 | 205260 | 44.392 | 0.8956 | 0 | 0 | 289.65 | 2.9326 | 512.85 | 4.6358 | 0 |
| 100 | 267 | 1-Octanol | C_{8} H_{18} O | 111-87-5 | 130.22792 | 571370 | -4849 | 19.725 | -0.021532 | 0 | 250 | 2.555 | 467.1 | 4.1566 | 0 |
| 100 | 268 | 2-Octanol | C_{8} H_{18} O | 123-96-6 | 130.228 | 1115100 | -9773.8 | 34.252 | -0.03454 | 0 | 241.55 | 2.6593 | 452.9 | 5.0556 | 0 |
| 100 | 269 | 2-Octanone | C_{8} H_{16} O | 111-13-7 | 128.21204 | 300400 | -426.2 | 1.1172 | 0 | 0 | 252.86 | 2.6406 | 500 | 3.666 | 0 |
| 100 | 270 | 3-Octanone | C_{8} H_{16} O | 106-68-3 | 128.21204 | 289980 | -417.27 | 1.2218 | 0 | 0 | 255.55 | 2.6314 | 440.65 | 3.4335 | 0 |
| 100 | 271 | 1-Octene | C_{8} H_{16} | 111-66-0 | 112.21264 | 509420 | -4279.1 | 21.477 | -0.044462 | 0.000035028 | 171.45 | 2.1327 | 454 | 3.2098 | 0 |
| 100 | 272 | Octyl mercaptan | C_{8} H_{18} S | 111-88-6 | 146.29352 | 240040 | -33.198 | 0.67889 | 0 | 0 | 240 | 2.7118 | 472.19 | 3.7573 | 0 |
| 100 | 273 | 1-Octyne | C_{8} H_{14} | 629-05-0 | 110.19676 | 42642 | 886.67 | -0.69315 | 0 | 0 | 200 | 1.9225 | 399.35 | 2.8619 | 0 |
| 100 | 274 | Oxalic acid | C_{2} H_{2} O_{4} | 144-62-7 | 90.03488 | 63131 | 199.92 | 0 | 0 | 0 | 462.65 | 1.5562 | 516 | 1.6629 | 0 |
| 100 | 275 | Oxygen | O_{2} | 7782-44-7 | 31.9988 | 175430 | -6152.3 | 113.92 | -0.92382 | 0.0027963 | 54.36 | 0.53646 | 142 | 0.90662 | 0 |
| 100 | 276 | Ozone | O_{3} | 10028-15-6 | 47.9982 | 60046 | 281.16 | 0 | 0 | 0 | 90 | 0.8535 | 150 | 1.0222 | 0 |
| 100 | 277 | Pentadecane | C_{15} H_{32} | 629-62-9 | 212.41458 | 346910 | 219.54 | 0.65632 | 0 | 0 | 283.07 | 4.6165 | 543.84 | 6.6042 | 0 |
| 100 | 278 | Pentanal | C_{5} H_{10} O | 110-62-3 | 86.1323 | 102000 | 389.95 | -0.32545 | 0 | 0 | 191.59 | 1.6476 | 375.15 | 2.0249 | 0 |
| 100 | 279 | Pentane | C_{5} H_{12} | 109-66-0 | 72.14878 | 159080 | -270.5 | 0.99537 | 0 | 0 | 143.42 | 1.4076 | 390 | 2.0498 | 0 |
| 100 | 280 | Pentanoic acid | C_{5} H_{10} O_{2} | 109-52-4 | 102.132 | 145050 | 28.344 | 0.6372 | 0 | 0 | 239.15 | 1.8827 | 458.95 | 2.9228 | 0 |
| 100 | 281 | 1-Pentanol | C_{5} H_{12} O | 71-41-0 | 88.1482 | 201200 | -651.3 | 2.275 | 0 | 0 | 200.14 | 1.6198 | 389.15 | 2.9227 | 0 |
| 100 | 282 | 2-Pentanol | C_{5} H_{12} O | 6032-29-7 | 88.1482 | 883630 | -8220.5 | 29.125 | -0.02989 | 0 | 200 | 1.6541 | 392.2 | 3.3636 | 0 |
| 100 | 283 | 2-Pentanone | C_{5} H_{10} O | 107-87-9 | 86.1323 | 194590 | -263.86 | 0.76808 | 0 | 0 | 196.29 | 1.7239 | 375.46 | 2.038 | 0 |
| 100 | 284 | 3-Pentanone | C_{5} H_{10} O | 96-22-0 | 86.1323 | 193020 | -176.43 | 0.5669 | 0 | 0 | 234.18 | 1.8279 | 375.14 | 2.0661 | 0 |
| 100 | 285 | 1-Pentene | C_{5} H_{10} | 109-67-1 | 70.1329 | 156100 | -456.94 | 2.255 | -0.003163 | 0.00000238 | 108.02 | 1.2939 | 372 | 1.8092 | 0 |
| 100 | 286 | 2-Pentyl mercaptan | C_{5} H_{12} S | 2084-19-7 | 104.21378 | 188200 | -140.84 | 0.63581 | 0 | 0 | 160.75 | 1.8199 | 385.15 | 2.2827 | 0 |
| 100 | 287 | Pentyl mercaptan | C_{5} H_{12} S | 110-66-7 | 104.21378 | 213760 | -324.4 | 0.9472 | 0 | 0 | 197.45 | 1.8664 | 399.79 | 2.3546 | 0 |
| 100 | 288 | 1-Pentyne | C_{5} H_{8} | 627-19-0 | 68.11702 | 86200 | 256.6 | 0 | 0 | 0 | 200 | 1.3752 | 313.33 | 1.666 | 0 |
| 100 | 289 | 2-Pentyne | C_{5} H_{8} | 627-21-4 | 68.11702 | 68671 | 246.66 | 0 | 0 | 0 | 200 | 1.18 | 329.27 | 1.4989 | 0 |
| 100 | 290 | Phenanthrene | C_{14} H_{10} | 85-01-8 | 178.2292 | 103370 | 527.03 | 0 | 0 | 0 | 372.39 | 2.9963 | 500 | 3.6689 | 0 |
| 100 | 291 | Phenol | C_{6} H_{6} O | 108-95-2 | 94.11124 | 101720 | 317.61 | 0 | 0 | 0 | 314.06 | 2.0147 | 425 | 2.367 | 0 |
| 100 | 292 | Phenyl isocyanate | C_{7} H_{5} NO | 103-71-9 | 119.1207 | 60834 | 215.89 | 0.29552 | 0 | 0 | 243.15 | 1.308 | 489.75 | 2.3745 | 0 |
| 100 | 293 | Phthalic anhydride | C_{8} H_{4} O_{3} | 85-44-9 | 148.11556 | 145400 | 252.4 | 0 | 0 | 0 | 404.15 | 2.4741 | 557.65 | 2.8615 | 0 |
| 100 | 294 | Propadiene | C_{3} H_{4} | 463-49-0 | 40.06386 | 66230 | 98.275 | 0 | 0 | 0 | 200 | 0.85885 | 238.65 | 0.89683 | 0 |
| 114 | 295 | Propane | C_{3} H_{8} | 74-98-6 | 44.09562 | 62.983 | 113630 | 633.21 | -873.46 | 0 | 85.47 | 0.84879 | 360 | 2.6079 | 369.83 |
| 100 | 296 | 1-Propanol | C_{3} H_{8} O | 71-23-8 | 60.09502 | 158760 | -635 | 1.969 | 0 | 0 | 146.95 | 1.0797 | 400 | 2.198 | 0 |
| 100 | 297 | 2-Propanol | C_{3} H_{8} O | 67-63-0 | 60.095 | 471710 | -4172.1 | 14.745 | -0.014402 | 0 | 185.26 | 1.1328 | 463 | 2.7146 | 0 |
| 100 | 298 | Propenylcyclohexene | C_{9} H_{14} | 13511-13-2 | 122.20746 | 201400 | -450.6 | 1.7053 | 0 | 0 | 199 | 1.7926 | 431.65 | 3.2463 | 0 |
| 100 | 299 | Propionaldehyde | C_{3} H_{6} O | 123-38-6 | 58.07914 | 55679 | 406.13 | -0.50303 | 0 | 0 | 165 | 1.09 | 322.15 | 1.3431 | 0 |
| 100 | 300 | Propionic acid | C_{3} H_{6} O_{2} | 79-09-4 | 74.0785 | 213660 | -702.7 | 1.6605 | 0 | 0 | 252.45 | 1.4209 | 414.32 | 2.0756 | 0 |
| 100 | 301 | Propionitrile | C_{3} H_{5} N | 107-12-0 | 55.0785 | 121750 | -149.56 | 0.47759 | 0 | 0 | 180.37 | 1.1031 | 370.25 | 1.3185 | 0 |
| 100 | 302 | Propyl acetate | C_{5} H_{10} O_{2} | 109-60-4 | 102.1317 | 83400 | 384.1 | 0 | 0 | 0 | 274.7 | 1.8891 | 404.7 | 2.3885 | 0 |
| 100 | 303 | Propyl amine | C_{3} H_{9} N | 107-10-8 | 59.11026 | 139530 | 78 | 0 | 0 | 0 | 188.36 | 1.5422 | 340 | 1.6605 | 0 |
| 100 | 304 | Propylbenzene | C_{9} H_{12} | 103-65-1 | 120.19158 | 174380 | -101.8 | 0.79 | 0 | 0 | 173.55 | 1.8051 | 432.39 | 2.7806 | 0 |
| 100 | 305 | Propylene | C_{3} H_{6} | 115-07-1 | 42.07974 | 114140 | -343.72 | 1.0905 | 0 | 0 | 87.89 | 0.92354 | 298.15 | 1.086 | 0 |
| 100 | 306 | Propyl formate | C_{4} H_{8} O_{2} | 110-74-7 | 88.10512 | 75700 | 326.1 | 0 | 0 | 0 | 298.15 | 1.7293 | 398.15 | 2.0554 | 0 |
| 100 | 307 | 2-Propyl mercaptan | C_{3} H_{8} S | 75-33-2 | 76.16062 | 138390 | -117.11 | 0.47059 | 0 | 0 | 142.61 | 1.3126 | 350 | 1.5505 | 0 |
| 100 | 308 | Propyl mercaptan | C_{3} H_{8} S | 107-03-9 | 76.16062 | 167330 | -319.1 | 0.8127 | 0 | 0 | 159.95 | 1.3708 | 340.87 | 1.5299 | 0 |
| 100 | 309 | 12-Propylene glycol | C_{3} H_{8} O_{2} | 57-55-6 | 76.09442 | 58080 | 445.2 | 0 | 0 | 0 | 213.15 | 1.5297 | 460.75 | 2.6321 | 0 |
| 100 | 310 | Quinone | C_{6} H_{4} O_{2} | 106-51-4 | 108.09476 | 45810 | 368.33 | 0 | 0 | 0 | 388.85 | 1.8904 | 683 | 2.9738 | 0 |
| 100 | 311 | Silicon tetrafluoride | F_{4} Si | 7783-61-1 | 104.07911 | 829380 | -7331.5 | 19.203 | 0 | 0 | 186.35 | 1.3 | 253.15 | 2.0403 | 0 |
| 100 | 312 | Styrene | C_{8} H_{8} | 100-42-5 | 104.14912 | 113340 | 290.2 | -0.6051 | 0.0013567 | 0 | 242.54 | 1.6749 | 418.31 | 2.2816 | 0 |
| 100 | 313 | Succinic acid | C_{4} H_{6} O_{4} | 110-15-6 | 118.08804 | 186250 | 247.8 | 0 | 0 | 0 | 460.85 | 3.0045 | 591 | 3.327 | 0 |
| 100 | 314 | Sulfur dioxide | O_{2} S | 7446-09-5 | 64.0638 | 85743 | 5.7443 | 0 | 0 | 0 | 197.67 | 0.86878 | 350 | 0.87754 | 0 |
| 100 | 315 | Sulfur hexafluoride | F_{6} S | 2551-62-4 | 146.0554192 | 119500 | 0 | 0 | 0 | 0 | 230.15 | 1.195 | 230.15 | 1.195 | 0 |
| 100 | 316 | Sulfur trioxide | O_{3} S | 7446-11-9 | 80.0632 | 258090 | 0 | 0 | 0 | 0 | 303.15 | 2.5809 | 303.15 | 2.5809 | 0 |
| 100 | 317 | Terephthalic acid | C_{8} H_{6} O_{4} | 100-21-0 | 166.13084 | 131270 | 345.64 | 0 | 0 | 0 | 700.15 | 3.7327 | 795.28 | 4.0615 | 0 |
| 100 | 318 | o-Terphenyl | C_{18} H_{14} | 84-15-1 | 230.30376 | 182900 | 635.09 | 0 | 0 | 0 | 329.35 | 3.9207 | 609.15 | 5.6977 | 0 |
| 100 | 319 | Tetradecane | C_{14} H_{30} | 629-59-4 | 198.388 | 353140 | 29.13 | 0.86116 | 0 | 0 | 279.01 | 4.2831 | 526.73 | 6.0741 | 0 |
| 100 | 320 | Tetrahydrofuran | C_{4} H_{8} O | 109-99-9 | 72.10572 | 171730 | -800.47 | 2.8934 | -0.0025015 | 0 | 164.65 | 1.0721 | 339.12 | 1.3546 | 0 |
| 100 | 321 | 1234-Tetrahydronaphthalene | C_{10} H_{12} | 119-64-2 | 132.20228 | 81760 | 455.38 | 0 | 0 | 0 | 237.38 | 1.8986 | 480.77 | 3.0069 | 0 |
| 100 | 322 | Tetrahydrothiophene | C_{4} H_{8} S | 110-01-0 | 88.17132 | 123300 | -130.1 | 0.6229 | 0 | 0 | 176.98 | 1.1979 | 394.27 | 1.6883 | 0 |
| 100 | 323 | 2233-Tetramethylbutane | C_{8} H_{18} | 594-82-1 | 114.22852 | 43326 | 630.73 | 0 | 0 | 0 | 375.41 | 2.8011 | 426 | 3.1202 | 0 |
| 100 | 324 | Thiophene | C_{4} H_{4} S | 110-02-1 | 84.13956 | 84864 | 91.725 | 0.13243 | 0 | 0 | 234.94 | 1.1372 | 357.31 | 1.3455 | 0 |
| 100 | 325 | Toluene | C_{7} H_{8} | 108-88-3 | 92.13842 | 140140 | -152.3 | 0.695 | 0 | 0 | 178.18 | 1.3507 | 500 | 2.3774 | 0 |
| 100 | 326 | 112-Trichloroethane | C_{2} H_{3} Cl_{3} | 79-00-5 | 133.40422 | 103350 | 159.3 | 0 | 0 | 0 | 236.5 | 1.4102 | 300 | 1.5114 | 0 |
| 100 | 327 | Tridecane | C_{13} H_{28} | 629-50-5 | 184.36142 | 350180 | -104.7 | 1.0022 | 0 | 0 | 267.76 | 3.94 | 508.62 | 5.5619 | 0 |
| 100 | 328 | Triethyl amine | C_{6} H_{15} N | 121-44-8 | 101.19 | 111480 | 368.13 | 0 | 0 | 0 | 200 | 1.8511 | 361.92 | 2.4471 | 0 |
| 100 | 329 | Trimethyl amine | C_{3} H_{9} N | 75-50-3 | 59.11026 | 136050 | -288 | 0.9913 | 0 | 0 | 156.08 | 1.1525 | 276.02 | 1.3208 | 0 |
| 100 | 330 | 123-Trimethylbenzene | C_{9} H_{12} | 526-73-8 | 120.19158 | 119450 | 324.54 | 0 | 0 | 0 | 247.79 | 1.9987 | 449.27 | 2.6526 | 0 |
| 100 | 331 | 124-Trimethylbenzene | C_{9} H_{12} | 95-63-6 | 120.19158 | 178800 | -128.47 | 0.83741 | 0 | 0 | 229.33 | 1.9338 | 350 | 2.3642 | 0 |
| 100 | 332 | 224-Trimethylpentane | C_{8} H_{18} | 540-84-1 | 114.22852 | 95275 | 696.7 | -1.3765 | 0.0021734 | 0 | 165.78 | 1.8285 | 520 | 3.9095 | 0 |
| 100 | 333 | 233-Trimethylpentane | C_{8} H_{18} | 560-21-4 | 114.22852 | 388620 | -1439.5 | 3.2187 | 0 | 0 | 280 | 2.3791 | 320 | 2.5757 | 0 |
| 100 | 334 | 135-Trinitrobenzene | C_{6} H_{3} N_{3} O_{6} | 99-35-4 | 213.10452 | 40364 | 664.46 | 0 | 0 | 0 | 398.4 | 3.0508 | 475.47 | 3.5629 | 0 |
| 100 | 335 | 246-Trinitrotoluene | C_{7} H_{5} N_{3} O_{6} | 118-96-7 | 227.1311 | 133530 | 514.64 | 0 | 0 | 0 | 354 | 3.1571 | 475 | 3.7798 | 0 |
| 100 | 336 | Undecane | C_{11} H_{24} | 1120-21-4 | 156.30826 | 293980 | -114.98 | 0.96936 | 0 | 0 | 247.57 | 3.2493 | 433.42 | 4.2624 | 0 |
| 100 | 337 | 1-Undecanol | C_{11} H_{24} O | 112-42-5 | 172.30766 | -1360200 | 10964 | -20.86 | 0.013055 | 0 | 289.05 | 3.8137 | 523.15 | 5.3573 | 0 |
| 100 | 338 | Vinyl acetate | C_{4} H_{6} O_{2} | 108-05-4 | 86.08924 | 136300 | -106.17 | 0.75175 | 0 | 0 | 259.56 | 1.5939 | 389.35 | 2.0892 | 0 |
| 100 | 339 | Vinyl acetylene | C_{4} H_{4} | 689-97-4 | 52.07456 | 68720 | 135 | 0 | 0 | 0 | 200 | 0.9572 | 278.25 | 1.0628 | 0 |
| 100 | 340 | Vinyl chloride | C_{2} H_{3} Cl | 75-01-4 | 62.49822 | -10320 | 322.8 | 0 | 0 | 0 | 200 | 0.5424 | 400 | 1.188 | 0 |
| 100 | 341 | Vinyl trichlorosilane | C_{2} H_{3} Cl_{3} Si | 75-94-5 | 161.48972 | 49516 | 420.35 | 0 | 0 | 0 | 178.35 | 1.2449 | 363.85 | 2.0246 | 0 |
| 100 | 342 | Water | H_{2} O | 7732-18-5 | 18.01528 | 276370 | -2090.1 | 8.125 | -0.014116 | 9.3701E-06 | 273.16 | 0.7615 | 533.15 | 0.89394 | 0 |
| 100 | 343 | m-Xylene | C_{8} H_{10} | 108-38-3 | 106.165 | 133860 | 7.8754 | 0.52265 | 0 | 0 | 217 | 1.6018 | 540.15 | 2.906 | 0 |
| 100 | 344 | o-Xylene | C_{8} H_{10} | 95-47-6 | 106.165 | 36500 | 1017.5 | -2.63 | 0.00302 | 0 | 247.98 | 1.7314 | 417.58 | 2.2269 | 0 |
| 100 | 345 | p-Xylene | C_{8} H_{10} | 106-42-3 | 106.165 | -35500 | 1287.2 | -2.599 | 0.002426 | 0 | 286.41 | 1.7697 | 600 | 3.252 | 0 |
|  |  |  |  |  |  |  |  |  |  |  |  |  |  |  | 0 |
|  |  |  |  |  |  |  |  |  |  |  |  |  |  |  | 0 |
