# Supplementary material for: Designing heat exchanger using EDTR method and python as a computational tool
Source: publisher site journal article supplement (doi:10.1515/ijcre-2025-0013), 2025-11-01
Supplement: Supplementary file 2 [file j_ijcre-2025-0013_suppl_003.docx]

**Values of Constants**

| layout angle | Reynolds Number | a1 | a2 | a3 | a4 | b1 | b2 | b3 | b4 |
| --- | --- | --- | --- | --- | --- | --- | --- | --- | --- |
| 30 | 100000-10000 | 0.321 | -0.388 | 1.45 | 0.519 | 0.372 | -0.123 | 7 | 0.5 |
| 30 | 10000-1000 | 0.321 | -0.388 | 0 | 0 | 0.486 | -0.152 | 0 | 0 |
| 30 | 1000-100 | 0.593 | -0.477 | 0 | 0 | 4.57 | -0.476 | 0 | 0 |
| 30 | 100-10 | 1.36 | -0.657 | 0 | 0 | 45.1 | -0.973 | 0 | 0 |
| 30 | <10 | 1.4 | -0.667 | 0 | 0 | 48 | -1 | 0 | 0 |
| 45 | 100000-10000 | 0.37 | -0.396 | 1.93 | 0.5 | 0.303 | -0.126 | 6.59 | 0.52 |
| 45 | 10000-1000 | 0.37 | -0.396 | 0 | 0 | 0.333 | -0.136 | 0 | 0 |
| 45 | 1000-100 | 0.73 | -0.5 | 0 | 0 | 3.5 | -0.476 | 0 | 0 |
| 45 | 100-10 | 0.498 | -0.656 | 0 | 0 | 26.2 | -0.913 | 0 | 0 |
| 45 | <10 | 1.55 | -0.667 | 0 | 0 | 32 | -1 | 0 | 0 |
| 90 | 100000-10000 | 0.37 | -0.395 | 1.187 | 0.37 | 0.391 | -0.148 | 6.3 | 0.378 |
| 90 | 10000-1000 | 0.107 | -0.266 | 0 | 0 | 0.0815 | 0.022 | 0 | 0 |
| 90 | 1000-100 | 0.408 | -0.46 | 0 | 0 | 6.09 | -0.602 | 0 | 0 |
| 90 | 100-10 | 0.9 | -0.631 | 0 | 0 | 32.1 | -0.963 | 0 | 0 |
| 90 | <10 | 0.97 | -0.667 | 0 | 0 | 35 | -1 | 0 | 0 |

| Number Passes | TPK1 | SPK1 | TPN2 | SPN2 |
| --- | --- | --- | --- | --- |
| 1 | 0.319 | 0.215 | 2.142 | 2.207 |
| 2 | 0.249 | 0.156 | 2.207 | 2.291 |
| 4 | 0.175 | 0.158 | 2.285 | 2.263 |
| 6 | 0.0743 | 0.0402 | 2.499 | 2.617 |
| 8 | 0.0365 | 0.0331 | 2.675 | 2.643 |
