# Supplementary material for: Designing heat exchanger using EDTR method and python as a computational tool
Source: publisher site journal article supplement (doi:10.1515/ijcre-2025-0013), 2025-11-01
Supplement: Supplementary file 3 [file j_ijcre-2025-0013_suppl_004.docx]

**APPENDIX A: Program designed for Kern method of heat exchanger calculations using EDTR Method.**

import tkinter as tk

from tkinter import Label, Entry, Button

from math import exp

from math import pi

import pandas as pd

import math

import time

import matplotlib.pyplot as plt

from matplotlib.figure import Figure

from matplotlib.backends.backend_tkagg import FigureCanvasTkAgg

import numpy as np

start_time = time.time()

# given quantities

def solve_equations():

mc = float(entry_mc.get())

mh = float(entry_mh.get())

tc1 = float(entry_tc1.get())

th1 = float(entry_th1.get())

th2 = float(entry_th2.get())

tc2 = float(entry_tc2.get())

l = float(entry_l.get())

kw = float(entry_kw.get())

hot = entry_hot.get()

cold = entry_cold.get()

Rd = float(entry_Rd.get())

p_allowed = float(entry_p_allowed.get())

p1_allowed = float(entry_p1_allowed.get())

sgh = float(entry_sgh.get())

sgc = float(entry_sgc.get())

tcavg = (tc1 + tc2)/2

thavg = (th1+th2)/2

# defining useful function that can be used in both the type of heat exchanger

global cpc,cph,uh,uc,uwh,uwc,kh,kc,b

def input_func():

global cpc

cpc = float(entry_cpc.get())

global cph

cph = float(entry_cph.get())

global uh

uh = float(entry_uh.get())

global uc

uc = float(entry_uc.get())

global uwh

uwh = float(entry_uwh.get())

global uwc

uwc = float(entry_uwc.get())

global kh

kh = float(entry_kh.get())

global kc

kc = float(entry_kc.get())

data_input = data1.get()

heatexchanger = heat1.get()

if data_input=='input':

input_func()

elif data_input=='database':

def get_specific_heat_capacity(T,liquid_name):

excel_file = 'kerndataforcode.xlsx'

specific_heat_sheet = 'Sheet3'

specific_heat_df = pd.read_excel(excel_file, sheet_name=specific_heat_sheet)

specific_heat_constants = specific_heat_df.loc[specific_heat_df['Name'] == liquid_name, 'C1':'C5'].values.flatten().astype(float)

specific_heat_equation = specific_heat_df.loc[specific_heat_df['Name'] == liquid_name, 'Eqn'].values

mw = specific_heat_df.loc[specific_heat_df['Name'] == liquid_name, 'Mol. wt.'].values

mw = mw[0]

c1s = (specific_heat_constants[0])

c2s = (specific_heat_constants[1])

c3s = (specific_heat_constants[2])

c4s = (specific_heat_constants[3])

c5s = (specific_heat_constants[4])

print(specific_heat_equation)

if specific_heat_equation == 100.0:

# Use Equation1 for specific heat capacity

cpo = c1s + c2s*T + c3s*(T*2) + c4s(T*3) + c5s(T**4)

elif specific_heat_equation == 114.0:

# Use Equation2 for specific heat capacity

Tc = specific_heat_df.loc[specific_heat_df['Name'] == liquid_name, 'Tc'].values.flatten().astype(float)

Tr = T/Tc

tou = 1-Tr

cpo = (c1s*2)/tou + c2s -2*c1s*c3s*tou-c1s*c4s(tou*2)-(c3s2)(tou*3)/3-c3s*c4s(tou*4)/2-(c4s2)(tou**5)/2

return cpo/mw

def get_viscosity_value(T,liquid_name):

excel_file = 'kerndataforcode.xlsx'

viscosity_sheet = 'Sheet1'

viscosity_df = pd.read_excel(excel_file, sheet_name=viscosity_sheet)

viscosity_constants = viscosity_df.loc[viscosity_df['Name'] == liquid_name, 'C1':'C5'].values.flatten().astype(float)

viscosity_equation = viscosity_df.loc[viscosity_df['Name'] == liquid_name, 'Eqn'].values

c1v = (viscosity_constants[0])

c2v = (viscosity_constants[1])

c3v = (viscosity_constants[2])

c4v = (viscosity_constants[3])

c5v = (viscosity_constants[4])

if viscosity_equation == 101:

# Use Equation1 for viscosity

mu = math.e*(c1v+(c2v/T)+c3v*math.log(T)+c4v(T**c5v))

else:

# Use Equation2 for viscosity

mu = c1v+c2v*T+c3v*(T*2)+c4v(T*3)+c5v(T*4)

return mu

def get_conductivity_value(T,liquid_name):

excel_file = 'kerndataforcode.xlsx'

thermal_conductivity_sheet = 'Sheet2'

thermal_conductivity_df = pd.read_excel(excel_file, sheet_name=thermal_conductivity_sheet)

thermal_conductivity_constants = thermal_conductivity_df.loc[thermal_conductivity_df['Name'] == liquid_name, 'C1':'C5'].values.flatten().astype(float)

c1c = (thermal_conductivity_constants[0])

c2c = (thermal_conductivity_constants[1])

c3c = (thermal_conductivity_constants[2])

c4c = (thermal_conductivity_constants[3])

c5c = (thermal_conductivity_constants[4])

k = c1c+c2c*T+c3c*(T*2)+c4c(T*3)+c5c(T**4)

return k

# the specific heat capacity at temperature tcavg and thavg

cpc = get_specific_heat_capacity(tcavg,cold)

cph = get_specific_heat_capacity(thavg,hot)

q = mc*cpc*(tc2-tc1)

tam = ((th1+th2)-(tc1+tc2))/2

def doublepipeheat_exchanger():

global doubletype

doubletype = entry_doubletype.get()

global D

D = float(entry_D.get())

global D1

D1 = float(entry_D1.get())

global D2

D2 = float(entry_D2.get())

global up, uwp, ua, uwa,kp,ka,tw,pipe,tpavg,annulus,ap,aa,mp,ma,cpp,cpa,tpavg,taavg,sgp,sga,pipe,annulus,gp,ga,De

ap = (pi*(D**2))/4

aa = (pi*((D2*2)-(D1*2)))/4

if (ap>aa and mh>mc) or (ap<aa and mh<mc):

mp = mh

ma = mc

cpp = cph

cpa = cpc

tpavg = thavg

taavg = tcavg

sgp = sgh

sga = sgc

pipe = hot

annulus = cold

else:

mp = mc

ma = mh

cpp = cpc

cpa = cph

tpavg = tcavg

taavg = tcavg

pipe = cold

annulus = hot

sgp = sgc

sga = sgh

gp = mp/ap

ga = ma/aa

De = ((D2*2)-(D1*2))/D1

tw = (th1+th2+tc1+tc2)/4

if data_input=='input':

if (ap>aa and mh>mc) or (ap<aa and mh<mc):

up = uh

uwp = uwh

ua = uc

uwa = uwc

else:

up = uc

uwp = uwc

ua = uh

uwa = uwh

elif data_input=='database':

# Call the function to get the viscosity value

up = get_viscosity_value(tpavg,pipe)

uwp = get_viscosity_value(tw,pipe)

# Call the function to get the viscosity value

ua = get_viscosity_value(taavg,annulus)

uwa = get_viscosity_value(tw,annulus)

if data_input=='input':

if (ap>aa and mh>mc) or (ap<aa and mh<mc):

kp = kh

ka = kc

else:

kp = kc

ka = kh

elif data_input=='database':

# Call the function to get the conductivity value

kp = get_conductivity_value(tpavg,pipe)

# Call the function to get the conductivity value

ka = get_conductivity_value(taavg,annulus)

def shellandtubeheat_exchanger():

global M

M = float(entry_M.get())

global nt

nt = float(entry_nt.get())

global n1

n1 = float(entry_n1.get())

global d

d = float(entry_d.get())

global do

do = float(entry_do.get())

global ds

ds= float(entry_ds.get())

global b

b = float(entry_b.get())

global pt

pt = float(entry_pt.get())

global rdg

rdg = float(entry_rdg.get())

global tp

tp = entry_tp.get()

global ut, uwt, us, uws, kt, ks,ttavg,tube,tw,tsavg,shell,ms,mt,cps,cpt,tsavg,ttavg,tube,shell,sgs,sgt,delpa,delpp,q,n,A,ud,Rd,l

ms = mh

mt = mc

cps = cph

cpt = cpc

tsavg = thavg

ttavg = tcavg

tube = cold

shell = hot

sgs = sgh

sgt = sgc

if data_input=='input':

ut = uc

uwt = uwc

us = uh

uws = uwh

elif data_input=='database':

# Call the function to get the viscosity value

ut = get_viscosity_value(ttavg,tube)

uwt = get_viscosity_value(tw,tube)

us = get_viscosity_value(tsavg,shell)

uws = get_viscosity_value(tw,shell)

if data_input=='input':

kt = kc

ks = kh

elif data_input=='database':

#conductivity value for tube and shell

kt = get_conductivity_value(ttavg,tube)

ks = get_conductivity_value(tsavg,shell)

# for double pipe heat exchange+

if heatexchanger.lower()=="doublepipeheatexchanger":

doublepipeheat_exchanger()

if doubletype.lower() == "parallel":

epsi = (1/(mh*cph))+(1/(mc*cpc))

elif doubletype.lower() == "countercurrent":

epsi = (1/(mh*cph))-(1/(mc*cpc))

gp = mp/ap

ga = ma/aa

De = ((D2*2)-(D1*2))/D1

tw = (th1+th2+tc1+tc2)/4

while True:

phip = (up/uwp)**0.14

phia = (ua/uwa)**0.14

rep = (D*gp)/up

rea = (De*ga)/ua

# calculation of hi

prp = (cpp*up)/kp

if rep<2100:

nup = 1.86*((rep*prp*D)/l)*phip

elif rep>4000:

nup = 0.027*(rep*0.8)(prp**(1/3))*phip

hi = (nup*kp)/D

#calculation of ho

pra = (cpa*ua)/ka

if rea<2100:

nua = 1.86*((rea*pra*D)/l)*phia

elif rea>4000:

nua = 0.027*(rea*0.8)(pra**(1/3))*phia

ho = (nua*ka)/De

tw1 =((hi*tpavg)+(ho*tpavg*(D1/D)))/((hi+ho*(D1/D)))

if data_input=='input':

tw=tw1

elif data_input=='database':

if tw1!=tw:

tw=tw1

continue

#to calclate the uc value

if kw==-1:

Uc=(hi*ho)/(hi+ho)

else:

Uc = 1/((D1/hi*D)+((D1/2*kw)*(math.log((D1/D))))+(1/ho))

ud = 1/((1/Uc)+Rd)

A = (math.log(abs((((2*tam)/q)+epsi)/(((2*tam)/q)-epsi))))/(ud*epsi)

l1=A/(3.14*D1)

n = l1/(2*l)

n = math.floor(n)+1

l3 = n*(2*l)

if rep<2100 or rea<2100:

if l!=l3:

l=l3

continue

elif l1==l3 and tw==tw1:

break

else:

l=l3

break

A=3.14*D1*l

ud=math.log(abs((((2*tam)/q)+epsi)/(((2*tam)/q)-epsi)))/(A*epsi)

Rd=(Uc-ud)/(Uc*ud)

De1=D2-D1

rea1=De1*ga/ua

# calculation for pipe

if rep<2000:

fp = 16/rep

elif rep>4000:

fp = 0.0035+(0.264/(D*gp/(up**0.42)))

rhop = (sgp)*1000

Fp = (4*fp*(gp*2)*l)/(2(rhop**2)*D)

#calculation of annulus

if rea1<2000:

fa = 16/rea

elif rea1>4000:

fa = 0.0035+(0.264/(De1*ga/(ua**0.42)))

rhoa = (sga)*1000

Fa = (4*fa*(ga*2)*l)/(2(rhoa**2)*De1)

#calculation of entrance loss

v = ga/rhoa

Fi=n*(v**2)/(2)

delpp = Fp*rhop

delpa = (Fa+Fi)*rhoa

if delpp<p1_allowed and delpa<p_allowed:

global desc_9, desc_10, desc_11, desc_12, desc_13, desc_14, desc_15, desc_16, desc_17, desc_18

desc_9 = f"the calculated pressure drop for pipe is {delpp} and for for annulus is {delpa}."

desc_10 = f"heat duty is {q}"

desc_11 = f"pressure drop of fluid in pipe is {delpp}"

desc_12 =f"pressure drop of fluid in pipe is {delpa}"

desc_13 = f"length of the heat exchanger is {l}"

desc_14 = f"number of hairpins are {n}"

desc_15 = f"area of heatexchanger is {A}"

desc_16 = f"ud is {ud}"

desc_17 = f"Rd is {Rd}"

desc_18 = "the values of this is less than the allowed pressure.hence given heat exchanger is allowed to work."

result_label1.config(text=f"{desc_9}\n{desc_10}\n{desc_11}\n{desc_12}\n{desc_13}\n{desc_14}\n{desc_15}\n{desc_16}\n{desc_17}\n{desc_18}")

result_label1.grid(row=36, column=0, columnspan=2, pady=10)

result_label2.grid_forget()

result_label3.grid_forget()

result_label4.grid_forget()

else:

desc_9 = "given heat exchanger is not allowed to work"

desc_10 = f"heat duty is {q}"

desc_11 = f"pressure drop of fluid in pipe is {delpp}"

desc_12 = f"pressure drop of fluid in pipe is {delpa}"

desc_13 = f"length of the heat exchanger is {l}"

desc_14 = f"number of hairpins are {n}"

desc_15 = f"area of heatexchanger is {A}"

desc_16 = f"ud is {ud}"

desc_17 = f"Rd is {Rd}"

result_label2.config(text=f"{desc_9}\n{desc_10}\n{desc_11}\n{desc_12}\n{desc_13}\n{desc_14}\n{desc_15}\n{desc_16}\n{desc_17}")

result_label2.grid(row=37, column=0, columnspan=2, pady=10)

result_label1.grid_forget()

result_label3.grid_forget()

result_label4.grid_forget()

if doubletype.lower() == "parallel":

fig = Figure()

ax = fig.add_subplot(111)

ax.set_title("Tkinter Embedded Matplotlib Plot")

b = 1/(mc*cpc)

B = 1/(mh*cph)

x = np.arange(math.ceil(l))

thx = (((b/B)np.ones(math.ceil(l))+np.exp(-ud(B+b)3.14*D*x))*th1+(np.ones(math.ceil(l))-np.exp(-ud(B+b)*3.14*D*x))*tc1)/(1+(b/B))

tcx = (((B/b)-1)th1+(((B/b)*np.exp(ud(B-b)3.14*D*l))-(B/b))*tc1)/((B/b)*np.exp(ud(B-b)3.14*D*l)-np.ones(math.ceil(l)))+th1+(((B/b)-1)*th1+(((B/b)*np.exp(ud(B-b)3.14*D*l))-(B/b))*tc1)/((B/b)*np.exp(ud(B-b)*3.14*D*l)-np.ones(math.ceil(l)))

ax.plot(x, thx,label='hot')

ax.plot(x, tcx, label='cold')

ax.set_xlabel("X-axis")

ax.set_ylabel("Y-axis")

# Create a canvas widget to embed the plot into the Tkinter window

canvas1 = FigureCanvasTkAgg(fig, master=window)

canvas1.draw()

# Place the canvas widget using the grid layout

canvas1.get_tk_widget().grid(row=40, column=0)

plt.show()

elif doubletype.lower() == "countercurrent":

b = 1/(mc*cpc)

B = 1/(mh*cph)

x = np.arange(math.ceil(l))

th1 = th1*np.ones(math.ceil(l))

th2 = th2*np.ones(math.ceil(l))

tc1 = tc1*np.ones(math.ceil(l))

thx = ((((B/b)-1)th1)+(((B/b)*np.exp(ud(B-b)3.14*D*x)-(B/b))*tc1))/((B/b)*np.exp(ud(B-b)*3.14*D*x)-np.ones(math.ceil(l)))

tcx = (b/B)*(thx-th2)+tc1

plt.plot(x, thx,'r', linewidth=2.0)

plt.plot(x, tcx,'b', linewidth=2.0)

plt.show()

# for shell and tube heat exchanger

elif heatexchanger.lower()=="shellandtubeheatexchanger":

shellandtubeheat_exchanger()

tlm = ((th1-tc2)-(th2-tc1))/(math.log((th1-tc2)/(th2-tc1)))

R = (th1-th2)/(tc2-tc1)

P1 = (tc2-tc1)/(th1-tc1)

pn = (1-((1-P1*R)/(1-P1))*M)/(R-((1-P1*R)/(1-P1))*M)

W = (1-pn*R)/(1-pn)

c = (((R*2)+1)*(1/2))/(R-1)

Fn = c*math.log(W*(1/M))/math.log((1+(W(1/M))-c+c(W*(1/M)))/(1+(W(1/M))+c-c(W**(1/M))))

# F need to be calculated

C = pt-do

at = (nt*3.14*(d**2))/(4*n1)

As = (ds*C*b)/pt

gt = mt/at

gs = ms/As

tw = (th1+th2+tc1+tc2)/4

while True:

phis = (us/uws)**0.14

phit = (ut/uwt)**0.14

if tp =="triangular":

de=(((pt*2)(3*(1/2)))-(1.57(do**2)))/(1.57*do)

elif tp =="square":

de=(4*(pt*2)-3.14(do**2))/(3.14*do)

ret = (d*gt)/ut

res = (de*gs)/us

prt = (cpt*ut)/kt

if ret<2100:

global nut

nut = 1.86*phit*((ret*prt*(d/l))**(1/3))

elif ret>4000:

nut = 0.027*phit*(prt*(1/3))(ret**0.8)

hi=(kt*nut)/d

prs = (us*cps)/ks

if res<2100:

global nus

nus = 1.86*phis*((res*prs*(d/l))**(1/3))

elif res>4000:

nus = 0.027*phis*(prs*(1/3))(res**0.8)

ho=(ks*nus)/de

tw1 = (hi*ttavg+ho*tsavg*(do/d))/(hi+ho*(do/d))

if data_input=='input':

tw=tw1

elif data_input=='database':

if tw!=tw1:

tw=tw1

continue

if kw==-1:

Uc=(hi*ho)/(hi+ho)

else:

Uc=1/((do/(hi*d))+((do/(2*kw))*(math.log(do/d)))+(1/ho))

A=(3.14*do*nt*l)

ud = q/(A*Fn*tlm)

rdc = (Uc-ud)/(Uc*ud)

if rdg>rdc:

print("calculated dirt factor is less than the given dirt factor hence the heatexchanger with the given specification is not allowed to work")

break

elif rdc>=rdg and tw==tw1:

rhot = sgt*1000

if ret<2100:

global ft

ft=16/ret

elif ret>4000:

ft=(0.0035+(0.264/((d*gt/ut)**0.42)))

PT = (4*ft*(gt**2)*l*n1)/(2*rhot*d*phit)

pr = (4*n1*(gt*2)(0.000532))/sgt

pT = pr+PT

rhos = sgs*1000

N=(l/b)-1

if 400<res<1000000:

global fs

fs = exp(0.576-0.19*(math.log(res)))

I=math.floor(N)+1

ps = (fs*(gs*2)*ds(I+1))/(2*rhos*de*rhos)

if ps<p_allowed and pT<p1_allowed:

global desc_1, desc_2, desc_3, desc_4, desc_5, desc_6, desc_7

desc_1 = "pressure drop level then the heat exchanger is allowed to work"

desc_2 = f'the area of the heat exchanger is {A}'

desc_3 = f"dirty heat transfer coefficient is {ud}"

desc_4 = f"clean heat transfer coefficient is {Uc}"

desc_5 = f"the heat duty is {q}"

desc_6 = f"pressure drop at tube side is {pT}"

desc_7 = f"pressure drop at shell side is {ps}"

result_label3.config(text=f"{desc_1}\n{desc_2}\n{desc_3}\n{desc_4}\n{desc_5}\n{desc_6}\n{desc_7}")

result_label3.grid(row=38, column=0, columnspan=2, pady=10)

result_label2.grid_forget()

result_label1.grid_forget()

result_label4.grid_forget()

else:

global desc_8

desc_8 = "the heat exchanger is not allowed to work"

result_label4.config(text=f"{desc_8}")

result_label4.grid(row=39, column=0, columnspan=2, pady=10)

result_label2.grid_forget()

result_label3.grid_forget()

result_label1.grid_forget()

break

def show_inputfunc():

label_cpc.grid(row=16, column=0, padx=10, pady=5, sticky="e")

entry_cpc.grid(row=16, column=1, padx=10, pady=5, sticky="w")

label_cph.grid(row=17, column=0, padx=10, pady=5, sticky="e")

entry_cph.grid(row=17, column=1, padx=10, pady=5, sticky="w")

label_uh.grid(row=18, column=0, padx=10, pady=5, sticky="e")

entry_uh.grid(row=18, column=1, padx=10, pady=5, sticky="w")

label_uc.grid(row=19, column=0, padx=10, pady=5, sticky="e")

entry_uc.grid(row=19, column=1, padx=10, pady=5, sticky="w")

label_uwh.grid(row=20, column=0, padx=10, pady=5, sticky="e")

entry_uwh.grid(row=20, column=1, padx=10, pady=5, sticky="w")

label_uwc.grid(row=21, column=0, padx=10, pady=5, sticky="e")

entry_uwc.grid(row=21, column=1, padx=10, pady=5, sticky="w")

label_kh.grid(row=22, column=0, padx=10, pady=5, sticky="e")

entry_kh.grid(row=22, column=1, padx=10, pady=5, sticky="w")

label_kc.grid(row=23, column=0, padx=10, pady=5, sticky="e")

entry_kc.grid(row=23, column=1, padx=10, pady=5, sticky="w")

def show_database_func():

label_cpc.grid_forget()

entry_cpc.grid_forget()

label_cph.grid_forget()

entry_cph.grid_forget()

label_uh.grid_forget()

entry_uh.grid_forget()

label_uc.grid_forget()

entry_uc.grid_forget()

label_uwh.grid_forget()

entry_uwh.grid_forget()

label_uwc.grid_forget()

entry_uwc.grid_forget()

label_kh.grid_forget()

entry_kh.grid_forget()

label_kc.grid_forget()

entry_kc.grid_forget()

def show_doublepipeheat_exchanger():

label_doubletype.grid(row=25, column=0, padx=10, pady=5, sticky="e")

entry_doubletype.grid(row=25, column=1, padx=10, pady=5, sticky="w")

label_D.grid(row=26, column=0, padx=10, pady=5, sticky="e")

entry_D.grid(row=26, column=1, padx=10, pady=5, sticky="w")

label_D1.grid(row=27, column=0, padx=10, pady=5, sticky="e")

entry_D1.grid(row=27, column=1, padx=10, pady=5, sticky="w")

label_D2.grid(row=28, column=0, padx=10, pady=5, sticky="e")

entry_D2.grid(row=28, column=1, padx=10, pady=5, sticky="w")

label_M.grid_forget()

entry_M.grid_forget()

label_nt.grid_forget()

entry_nt.grid_forget()

label_n1.grid_forget()

entry_n1.grid_forget()

label_d.grid_forget()

entry_d.grid_forget()

label_do.grid_forget()

entry_do.grid_forget()

label_ds.grid_forget()

entry_ds.grid_forget()

label_b.grid_forget()

entry_b.grid_forget()

label_pt.grid_forget()

entry_pt.grid_forget()

label_rdg.grid_forget()

entry_rdg.grid_forget()

label_tp.grid_forget()

entry_tp.grid_forget()

def show_shellandtubeheatexchanger():

label_doubletype.grid_forget()

entry_D.grid_forget()

label_D.grid_forget()

entry_D.grid_forget()

label_D1.grid_forget()

entry_D1.grid_forget()

label_D2.grid_forget()

entry_D2.grid_forget()

label_M.grid(row=25, column=0, padx=10, pady=5, sticky="e")

entry_M.grid(row=25, column=1, padx=10, pady=5, sticky="w")

label_nt.grid(row=26, column=0, padx=10, pady=5, sticky="e")

entry_nt.grid(row=26, column=1, padx=10, pady=5, sticky="w")

label_n1.grid(row=27, column=0, padx=10, pady=5, sticky="e")

entry_n1.grid(row=27, column=1, padx=10, pady=5, sticky="w")

label_d.grid(row=28, column=0, padx=10, pady=5, sticky="e")

entry_d.grid(row=28, column=1, padx=10, pady=5, sticky="w")

label_do.grid(row=29, column=0, padx=10, pady=5, sticky="e")

entry_do.grid(row=29, column=1, padx=10, pady=5, sticky="w")

label_ds.grid(row=30, column=0, padx=10, pady=5, sticky="e")

entry_ds.grid(row=30, column=1, padx=10, pady=5, sticky="w")

label_b.grid(row=31, column=0, padx=10, pady=5, sticky="e")

entry_b.grid(row=31, column=1, padx=10, pady=5, sticky="w")

label_pt.grid(row=32, column=0, padx=10, pady=5, sticky="e")

entry_pt.grid(row=32, column=1, padx=10, pady=5, sticky="w")

label_rdg.grid(row=33, column=0, padx=10, pady=5, sticky="e")

entry_rdg.grid(row=33, column=1, padx=10, pady=5, sticky="w")

label_tp.grid(row=34, column=0, padx=10, pady=5, sticky="e")

entry_tp.grid(row=34, column=1, padx=10, pady=5, sticky="w")

# building Gui

window = tk.Tk()

window.title("Heat Exchanger Design")

# Configure window size and background color

screen_width = window.winfo_screenwidth()

screen_height = window.winfo_screenheight()

# Set the window size to match the screen size

window.geometry(f"{screen_width}x{screen_height}")

window.configure(bg="#F0F0F0")

canvas = tk.Canvas(window)

canvas.grid(row=0, column=0, sticky="nsew")

frame = tk.Frame(canvas)

canvas.create_window((0, 0), window=frame, anchor="nw")

scrollbar =tk.Scrollbar(window, orient=tk.VERTICAL, command=canvas.yview)

scrollbar.grid(row=0, column=20, sticky="ns")

canvas.config(yscrollcommand=scrollbar.set)

# Function to set a consistent style for labels and entries

def set_style(widget):

widget.configure(bg="#F0F0F0", font=("Arial", 12))

choice = tk.IntVar()

label_mc = Label(frame, text="Mass flow rate of cold fluid(Kg/s):")

set_style(label_mc)

label_mc.grid(row=0, column=0, padx=10, pady=5, sticky="e")

entry_mc = Entry(frame)

set_style(entry_mc)

entry_mc.grid(row=0, column=1, padx=10, pady=5, sticky="w")

label_mh = Label(frame, text="Mass flow rate of hot fluid(kg/s):")

set_style(label_mh)

label_mh.grid(row=1, column=0, padx=10, pady=5, sticky="e")

entry_mh = Entry(frame)

set_style(entry_mh)

entry_mh.grid(row=1, column=1, padx=10, pady=5, sticky="w")

label_tc1 = Label(frame, text="inlet temperature of cold fluid(K):")

set_style(label_tc1)

label_tc1.grid(row=2, column=0, padx=10, pady=5, sticky="e")

entry_tc1 = Entry(frame)

set_style(entry_tc1)

entry_tc1.grid(row=2, column=1, padx=10, pady=5, sticky="w")

label_th1 = Label(frame, text="inlet temperature of hot fluid(K):")

set_style(label_th1)

label_th1.grid(row=3, column=0, padx=10, pady=5, sticky="e")

entry_th1 = Entry(frame)

set_style(entry_th1)

entry_th1.grid(row=3, column=1, padx=10, pady=5, sticky="w")

label_th2 = Label(frame, text="outlet temperature of hot fluid(K):")

set_style(label_th2)

label_th2.grid(row=4, column=0, padx=10, pady=5, sticky="e")

entry_th2 = Entry(frame)

set_style(entry_th2)

entry_th2.grid(row=4, column=1, padx=10, pady=5, sticky="w")

label_tc2 = Label(frame, text="outlet temperature of cold fluid(K):")

set_style(label_tc2)

label_tc2.grid(row=5, column=0, padx=10, pady=5, sticky="e")

entry_tc2 = Entry(frame)

set_style(entry_tc2)

entry_tc2.grid(row=5, column=1, padx=10, pady=5, sticky="w")

label_l = Label(frame, text="length of one hairpin(m):")

set_style(label_l)

label_l.grid(row=6, column=0, padx=10, pady=5, sticky="e")

entry_l = Entry(frame)

set_style(entry_l)

entry_l.grid(row=6, column=1, padx=10, pady=5, sticky="w")

label_kw = Label(frame, text="kw:")

set_style(label_kw)

label_kw.grid(row=7, column=0, padx=10, pady=5, sticky="e")

entry_kw = Entry(frame)

set_style(entry_kw)

entry_kw.grid(row=7, column=1, padx=10, pady=5, sticky="w")

label_hot = Label(frame, text="name of hot fluid:")

set_style(label_hot)

label_hot.grid(row=8, column=0, padx=10, pady=5, sticky="e")

entry_hot = Entry(frame)

set_style(entry_hot)

entry_hot.grid(row=8, column=1, padx=10, pady=5, sticky="w")

label_cold = Label(frame, text="name of cold fluid:")

set_style(label_cold)

label_cold.grid(row=9, column=0, padx=10, pady=5, sticky="e")

entry_cold = Entry(frame)

set_style(entry_cold)

entry_cold.grid(row=9, column=1, padx=10, pady=5, sticky="w")

label_Rd = Label(frame, text="allowable dirt factor(K(m^2)/W):")

set_style(label_Rd)

label_Rd.grid(row=10, column=0, padx=10, pady=5, sticky="e")

entry_Rd = Entry(frame)

set_style(entry_Rd)

entry_Rd.grid(row=10, column=1, padx=10, pady=5, sticky="w")

label_p_allowed = Label(frame, text="enter the allowed pressure shell or annulus(pascal):")

set_style(label_p_allowed)

label_p_allowed.grid(row=11, column=0, padx=10, pady=5, sticky="e")

entry_p_allowed = Entry(frame)

set_style(entry_p_allowed)

entry_p_allowed.grid(row=11, column=1, padx=10, pady=5, sticky="w")

label_p1_allowed = Label(frame, text="enter the allowed pressure tube or pipe(pascal):")

set_style(label_p1_allowed)

label_p1_allowed.grid(row=12, column=0, padx=10, pady=5, sticky="e")

entry_p1_allowed = Entry(frame)

set_style(entry_p1_allowed)

entry_p1_allowed.grid(row=12, column=1, padx=10, pady=5, sticky="w")

label_sgh = Label(frame, text="specific gravity of hot fluid:")

set_style(label_sgh)

label_sgh.grid(row=13, column=0, padx=10, pady=5, sticky="e")

entry_sgh = Entry(frame)

set_style(entry_sgh)

entry_sgh.grid(row=13, column=1, padx=10, pady=5, sticky="w")

label_sgc = Label(frame, text="specific gravity of cold fluid:")

set_style(label_sgc)

label_sgc.grid(row=14, column=0, padx=10, pady=5, sticky="e")

entry_sgc = Entry(frame)

set_style(entry_sgc)

entry_sgc.grid(row=14, column=1, padx=10, pady=5, sticky="w")

label_data_type = Label(frame, text="data type")

set_style(label_data_type)

label_data_type.grid(row=15, column=0, padx=10, pady=5, sticky="e")

data1 = tk.StringVar()

radio_input = tk.Radiobutton(frame, text="input", variable=data1, value="input", command = show_inputfunc)

radio_input.grid(row=15,column=1, padx=10, pady=5)

radio_database = tk.Radiobutton(frame, text="database", variable=data1, value="database", command = show_database_func)

radio_database.grid(row=15,column=2,padx=10,pady=5)

label_cpc = Label(frame, text="specific heat capacity of cold fluid:")

set_style(label_cpc)

entry_cpc = Entry(frame)

set_style(entry_cpc)

label_cph = Label(frame, text="specific heat capacity of hot fluid:")

set_style(label_cph)

entry_cph = Entry(frame)

set_style(entry_cph)

label_uh = Label(frame, text="viscosity of hot fluid at average temperature(kg/m*s):")

set_style(label_uh)

entry_uh = Entry(frame)

set_style(entry_uh)

label_uc = Label(frame, text="viscosity of cold fluid at average temperature(kg/m*s):")

set_style(label_uc)

entry_uc = Entry(frame)

set_style(entry_uc)

label_uwh = Label(frame, text="viscosity of hot fluid at wall temperature(kg/m*s):")

set_style(label_uwh)

entry_uwh = Entry(frame)

set_style(entry_uwh)

label_uwc = Label(frame, text="viscosity of cold fluid at wall temperature(kg/m*s):")

set_style(label_uwc)

entry_uwc = Entry(frame)

set_style(entry_uwc)

label_kh = Label(frame, text="thermal conductivity of hot fluid at average temperature(W/m*K):")

set_style(label_kh)

entry_kh = Entry(frame)

set_style(entry_kh)

label_kc = Label(frame, text="thermal conductivity of cold fluid at average temperature(W/m*K):")

set_style(label_kc)

entry_kc = Entry(frame)

set_style(entry_kc)

label_heatexchanger = Label(frame, text="heat exchanger")

set_style(label_heatexchanger)

label_heatexchanger.grid(row=24, column=0, padx=10, pady=5, sticky="e")

heat1 = tk.StringVar()

radio_doublepipe = tk.Radiobutton(frame, text="double pipe", variable=heat1, value="doublepipeheatexchanger", command = show_doublepipeheat_exchanger)

radio_doublepipe.grid(row=24, column=1, padx=10, pady=5)

radio_shellandtube = tk.Radiobutton(frame, text="shell and tube", variable=heat1, value="shellandtubeheatexchanger", command = show_shellandtubeheatexchanger)

radio_shellandtube.grid(row=24, column=2, padx=10, pady=5)

label_doubletype = Label(frame, text="parallel or countercurrent:")

set_style(label_doubletype)

entry_doubletype = Entry(frame)

set_style(entry_doubletype)

label_D = Label(frame, text="inner diameter of pipe(m):")

set_style(label_D)

entry_D = Entry(frame)

set_style(entry_D)

label_D1 = Label(frame, text="outer diameter of pipe(m):")

set_style(label_D1)

entry_D1 = Entry(frame)

set_style(entry_D1)

label_D2 = Label(frame, text="inner diameter of annulus(m):")

set_style(label_D2)

entry_D2 = Entry(frame)

set_style(entry_D2)

label_M = Label(frame, text="Number of shell passes:")

set_style(label_M)

entry_M = Entry(frame)

set_style(entry_M)

label_nt = Label(frame, text="number of tubes:")

set_style(label_nt)

entry_nt = Entry(frame)

set_style(entry_nt)

label_n1 = Label(frame, text="number of tube passes(m):")

set_style(label_n1)

entry_n1 = Entry(frame)

set_style(entry_n1)

label_d = Label(frame, text="inner diameter of tube(m):")

set_style(label_d)

entry_d = Entry(frame)

set_style(entry_d)

label_do = Label(frame, text="outer diameter of tube(m):")

set_style(label_do)

entry_do = Entry(frame)

set_style(entry_do)

label_ds = Label(frame, text="inner diameter of shell(m):")

set_style(label_ds)

entry_ds = Entry(frame)

set_style(entry_ds)

label_b = Label(frame, text="baffle spacing:")

set_style(label_b)

entry_b = Entry(frame)

set_style(entry_b)

label_pt = Label(frame, text="tube pitch:")

set_style(label_pt)

entry_pt = Entry(frame)

set_style(entry_pt)

label_rdg = Label(frame, text="allowable dirt factor:")

set_style(label_rdg)

entry_rdg = Entry(frame)

set_style(entry_rdg)

label_tp = Label(frame, text="type of pitch(square or triangular):")

set_style(label_tp)

entry_tp = Entry(frame)

set_style(entry_tp)

def on_frame_configure(event):

canvas.configure(scrollregion=canvas.bbox("all"))

frame.bind("<Configure>", on_frame_configure)

calculate_button = Button(frame, text="Calculate", command=solve_equations, bg="#4CAF50", fg="white", font=("Arial", 14))

calculate_button.grid(row=35, column=0, columnspan=2, pady=20)

window.grid_rowconfigure(0, weight=1)

window.grid_columnconfigure(0, weight=1)

result_label1 = Label(frame, text="", bg="#F0F0F0", font=("Arial", 14))

result_label2 = Label(frame, text="", bg="#F0F0F0", font=("Arial", 14))

result_label3 = Label(frame, text="", bg="#F0F0F0", font=("Arial", 14))

result_label4 = Label(frame, text="", bg="#F0F0F0", font=("Arial", 14))

window.mainloop()

end_time = time.time()

runtime = end_time-start_time

print(f"runtime is {runtime}")

**APPENDIX B:** **Program designed for Kern method of heat exchanger calculations using EDTR Method.**

import tkinter as tk

from tkinter import Label, Entry, Button

from math import pi

import pandas as pd

import math

import time

import matplotlib.pyplot as plt

from matplotlib.figure import Figure

from matplotlib.backends.backend_tkagg import FigureCanvasTkAgg

import numpy as np

start_time = time.time()

# given quantities

def solve_equations():

mc = float(entry_mc.get())

mh = float(entry_mh.get())

tc1 = float(entry_tc1.get())

th1 = float(entry_th1.get())

th2 = float(entry_th2.get())

tc2 = float(entry_tc2.get())

kw = float(entry_kw.get())

hot = entry_hot.get()

cold = entry_cold.get()

Rd = float(entry_Rd.get())

p_allowed = float(entry_p_allowed.get())

p1_allowed = float(entry_p1_allowed.get())

sgh = float(entry_sgh.get())

sgc = float(entry_sgc.get())

tcavg = (tc1 + tc2)/2

thavg = (th1+th2)/2

# defining useful function that can be used in both the type of heat exchanger

global cpc,cph,uh,uc,uwh,uwc,kh,kc,b

def input_func():

global cpc

cpc = float(entry_cpc.get())

global cph

cph = float(entry_cph.get())

global uh

uh = float(entry_uh.get())

global uc

uc = float(entry_uc.get())

global uwh

uwh = float(entry_uwh.get())

global uwc

uwc = float(entry_uwc.get())

global kh

kh = float(entry_kh.get())

global kc

kc = float(entry_kc.get())

data_input = data1.get()

heatexchanger = heat1.get()

if data_input=='input':

input_func()

elif data_input=='database':

def get_specific_heat_capacity(T,liquid_name):

excel_file = 'kerndataforcode.xlsx'

specific_heat_sheet = 'Sheet3'

specific_heat_df = pd.read_excel(excel_file, sheet_name=specific_heat_sheet)

specific_heat_constants = specific_heat_df.loc[specific_heat_df['Name'] == liquid_name, 'C1':'C5'].values.flatten().astype(float)

specific_heat_equation = specific_heat_df.loc[specific_heat_df['Name'] == liquid_name, 'Eqn'].values

mw = specific_heat_df.loc[specific_heat_df['Name'] == liquid_name, 'Mol. wt.'].values

mw = mw[0]

c1s = (specific_heat_constants[0])

c2s = (specific_heat_constants[1])

c3s = (specific_heat_constants[2])

c4s = (specific_heat_constants[3])

c5s = (specific_heat_constants[4])

print(specific_heat_equation)

if specific_heat_equation == 100.0:

# Use Equation1 for specific heat capacity

cpo = c1s + c2s*T + c3s*(T*2) + c4s(T*3) + c5s(T**4)

elif specific_heat_equation == 114.0:

# Use Equation2 for specific heat capacity

Tc = specific_heat_df.loc[specific_heat_df['Name'] == liquid_name, 'Tc'].values.flatten().astype(float)

Tr = T/Tc

tou = 1-Tr

cpo = (c1s*2)/tou + c2s -2*c1s*c3s*tou-c1s*c4s(tou*2)-(c3s2)(tou*3)/3-c3s*c4s(tou*4)/2-(c4s2)(tou**5)/2

return cpo/mw

def get_viscosity_value(T,liquid_name):

excel_file = 'kerndataforcode.xlsx'

viscosity_sheet = 'Sheet1'

viscosity_df = pd.read_excel(excel_file, sheet_name=viscosity_sheet)

viscosity_constants = viscosity_df.loc[viscosity_df['Name'] == liquid_name, 'C1':'C5'].values.flatten().astype(float)

viscosity_equation = viscosity_df.loc[viscosity_df['Name'] == liquid_name, 'Eqn'].values

c1v = (viscosity_constants[0])

c2v = (viscosity_constants[1])

c3v = (viscosity_constants[2])

c4v = (viscosity_constants[3])

c5v = (viscosity_constants[4])

if viscosity_equation == 101:

# Use Equation1 for viscosity

mu = math.e*(c1v+(c2v/T)+c3v*math.log(T)+c4v(T**c5v))

else:

# Use Equation2 for viscosity

mu = c1v+c2v*T+c3v*(T*2)+c4v(T*3)+c5v(T*4)

return mu

def get_conductivity_value(T,liquid_name):

excel_file = 'kerndataforcode.xlsx'

thermal_conductivity_sheet = 'Sheet2'

thermal_conductivity_df = pd.read_excel(excel_file, sheet_name=thermal_conductivity_sheet)

thermal_conductivity_constants = thermal_conductivity_df.loc[thermal_conductivity_df['Name'] == liquid_name, 'C1':'C5'].values.flatten().astype(float)

c1c = (thermal_conductivity_constants[0])

c2c = (thermal_conductivity_constants[1])

c3c = (thermal_conductivity_constants[2])

c4c = (thermal_conductivity_constants[3])

c5c = (thermal_conductivity_constants[4])

k = c1c+c2c*T+c3c*(T*2)+c4c(T*3)+c5c(T**4)

return k

# the specific heat capacity at temperature tcavg and thavg

cpc = get_specific_heat_capacity(tcavg,cold)

cph = get_specific_heat_capacity(thavg,hot)

q = mc*cpc*(tc2-tc1)

tam = ((th1+th2)-(tc1+tc2))/2

def doublepipeheat_exchanger():

global doubletype

doubletype = entry_doubletype.get()

global D

D = float(entry_D.get())

global D1

D1 = float(entry_D1.get())

global D2

D2 = float(entry_D2.get())

global l

l = float(entry_l.get())

global up, uwp, ua, uwa,kp,ka,tw,pipe,tpavg,annulus,ap,aa,mp,ma,cpp,cpa,tpavg,taavg,sgp,sga,pipe,annulus,gp,ga,De

ap = (pi*(D**2))/4

aa = (pi*((D2*2)-(D1*2)))/4

if (ap>aa and mh>mc) or (ap<aa and mh<mc):

mp = mh

ma = mc

cpp = cph

cpa = cpc

tpavg = thavg

taavg = tcavg

sgp = sgh

sga = sgc

pipe = hot

annulus = cold

else:

mp = mc

ma = mh

cpp = cpc

cpa = cph

tpavg = tcavg

taavg = tcavg

pipe = cold

annulus = hot

sgp = sgc

sga = sgh

gp = mp/ap

ga = ma/aa

De = ((D2*2)-(D1*2))/D1

tw = (th1+th2+tc1+tc2)/4

if data_input=='input':

if (ap>aa and mh>mc) or (ap<aa and mh<mc):

up = uh

uwp = uwh

ua = uc

uwa = uwc

else:

up = uc

uwp = uwc

ua = uh

uwa = uwh

elif data_input=='database':

# Call the function to get the viscosity value

up = get_viscosity_value(tpavg,pipe)

uwp = get_viscosity_value(tw,pipe)

# Call the function to get the viscosity value

ua = get_viscosity_value(taavg,annulus)

uwa = get_viscosity_value(tw,annulus)

if data_input=='input':

if (ap>aa and mh>mc) or (ap<aa and mh<mc):

kp = kh

ka = kc

else:

kp = kc

ka = kh

elif data_input=='database':

# Call the function to get the conductivity value

kp = get_conductivity_value(tpavg,pipe)

# Call the function to get the conductivity value

ka = get_conductivity_value(taavg,annulus)

def shellandtubeheat_exchanger():

global M

M = float(entry_M.get())

global question

question = entry_question.get()

global Np

Np = float(entry_Np.get())

global Wp

Wp = float(entry_Wp.get())

global lsb

lsb = float(entry_lsb.get())

global ltb

ltb = float(entry_ltb.get())

global lbb

lbb = float(entry_lbb.get())

global ntp

ntp = float(entry_ntp.get())

global n1

n1 = float(entry_n1.get())

global d

d = float(entry_d.get())

global do

do = float(entry_do.get())

global ds

ds = float(entry_ds.get())

global lb

lb = float(entry_lb.get())

global pt

pt = float(entry_pt.get())

global rds

rds = float(entry_rds.get())

global rdt

rdt = float(entry_rdt.get())

global bpercent

bpercent = float(entry_bpercent.get())

global layout_type

layout_type = float(entry_layout_type.get())

global lbout

lbout = float(entry_lbout.get())

global lbin

lbin = float(entry_lbin.get())

global nss

nss = float(entry_nss.get())

global pitch

pitch = entry_pitch.get()

global l5

l5 = float(entry_l5.get())

global ms,mt,cps,cpt,tsavg,ttavg,tube,shell,sgs,sgt,ut,uwt,us,uws,kt,ks

# F need to be calculated

if question=='shell':

ms = mh

mt = mc

cps = cph

cpt = cpc

tsavg = thavg

ttavg = tcavg

tube = cold

shell = hot

sgs = sgh

sgt = sgc

elif question=='tube':

ms = mc

mt = mh

cps = cpc

cpt = cph

tsavg = tcavg

ttavg = thavg

tube = hot

shell = cold

sgs = sgc

sgt = sgh

if data_input=='input':

if question=='shell':

ut = float(entry_uc.get())

uwt = float(entry_uwc.get())

us = float(entry_uh.get())

uws = float(entry_uwh.get())

elif question=='tube':

us = float(entry_uc.get())

uws = float(entry_uwc.get())

ut = float(entry_uh.get())

uwt = float(entry_uwh.get())

elif data_input=='database':

# Call the function to get the viscosity value

ut = get_viscosity_value(ttavg,tube)

uwt = get_viscosity_value(tw,tube)

us = get_viscosity_value(tsavg,shell)

uws = get_viscosity_value(tw,shell)

if data_input=='input':

if question=='shell':

kt = float(entry_kc.get())

ks = float(entry_kh.get())

elif question=='tube':

ks = float(entry_kc.get())

kt= float(entry_kh.get())

elif data_input=='database':

#conductivity value for tube and shell

kt = get_conductivity_value(ttavg,tube)

ks = get_conductivity_value(tsavg,shell)

# for double pipe heat exchange

if heatexchanger.lower()=="doublepipeheatexchanger":

doublepipeheat_exchanger()

if doubletype.lower() == "parallel":

epsi = (1/(mh*cph))+(1/(mc*cpc))

elif doubletype.lower() == "countercurrent":

epsi = (1/(mh*cph))-(1/(mc*cpc))

gp = mp/ap

ga = ma/aa

De = ((D2*2)-(D1*2))/D1

tw = (th1+th2+tc1+tc2)/4

while True:

phip = (up/uwp)**0.14

phia = (ua/uwa)**0.14

rep = (D*gp)/up

rea = (De*ga)/ua

# calculation of hi

prp = (cpp*up)/kp

if rep<2100:

nup = 1.86*((rep*prp*D)/l)*phip

elif rep>4000:

nup = 0.027*(rep*0.8)(prp**(1/3))*phip

hi = (nup*kp)/D

#calculation of ho

pra = (cpa*ua)/ka

if rea<2100:

nua = 1.86*((rea*pra*D)/l)*phia

elif rea>4000:

nua = 0.027*(rea*0.8)(pra**(1/3))*phia

ho = (nua*ka)/De

tw1 =((hi*tpavg)+(ho*tpavg*(D1/D)))/((hi+ho*(D1/D)))

if data_input=='input':

tw=tw1

elif data_input=='database':

if tw1!=tw:

tw=tw1

continue

#to calclate the uc value

if kw==-1:

Uc=(hi*ho)/(hi+ho)

else:

Uc = 1/((D1/hi*D)+((D1/2*kw)*(math.log((D1/D))))+(1/ho))

ud = 1/((1/Uc)+Rd)

A = (math.log(abs((((2*tam)/q)+epsi)/(((2*tam)/q)-epsi))))/(ud*epsi)

l1=A/(3.14*D1)

n = l1/(2*l)

n = math.floor(n)+1

l3 = n*(2*l)

if rep<2100 or rea<2100:

if l!=l3:

l=l3

continue

elif l1==l3 and tw==tw1:

break

else:

l=l3

break

A=3.14*D1*l

ud=math.log(abs((((2*tam)/q)+epsi)/(((2*tam)/q)-epsi)))/(A*epsi)

Rd=(Uc-ud)/(Uc*ud)

De1=D2-D1

rea1=De1*ga/ua

# calculation for pipe

if rep<2000:

fp = 16/rep

elif rep>4000:

fp = 0.0035+(0.264/(D*gp/(up**0.42)))

rhop = (sgp)*1000

Fp = (4*fp*(gp*2)*l)/(2(rhop**2)*D)

#calculation of annulus

if rea1<2000:

fa = 16/rea

elif rea1>4000:

fa = 0.0035+(0.264/(De1*ga/(ua**0.42)))

rhoa = (sga)*1000

Fa = (4*fa*(ga*2)*l)/(2(rhoa**2)*De1)

#calculation of entrance loss

v = ga/rhoa

Fi=n*(v**2)/(2)

delpp = Fp*rhop

delpa = (Fa+Fi)*rhoa

if delpp<p1_allowed and delpa<p_allowed:

global desc_9, desc_10, desc_11, desc_12, desc_13, desc_14, desc_15, desc_16, desc_17, desc_18

desc_9 = f"the calculated pressure drop for pipe is {delpp} and for for annulus is {delpa}."

desc_10 = f"heat duty is {q}"

desc_11 = f"pressure drop of fluid in pipe is {delpp}"

desc_12 =f"pressure drop of fluid in pipe is {delpa}"

desc_13 = f"length of the heat exchanger is {l}"

desc_14 = f"number of hairpins are {n}"

desc_15 = f"area of heatexchanger is {A}"

desc_16 = f"ud is {ud}"

desc_17 = f"Rd is {Rd}"

desc_18 = "the values of this is less than the allowed pressure.hence given heat exchanger is allowed to work."

result_label1.config(text=f"{desc_9}\n{desc_10}\n{desc_11}\n{desc_12}\n{desc_13}\n{desc_14}\n{desc_15}\n{desc_16}\n{desc_17}\n{desc_18}")

result_label1.grid(row=48, column=0, columnspan=2, pady=10)

result_label2.grid_forget()

result_label3.grid_forget()

result_label4.grid_forget()

result_label5.grid_forget()

else:

desc_9 = "given heat exchanger is not allowed to work"

desc_10 = f"heat duty is {q}"

desc_11 = f"pressure drop of fluid in pipe is {delpp}"

desc_12 = f"pressure drop of fluid in pipe is {delpa}"

desc_13 = f"length of the heat exchanger is {l}"

desc_14 = f"number of hairpins are {n}"

desc_15 = f"area of heatexchanger is {A}"

desc_16 = f"ud is {ud}"

desc_17 = f"Rd is {Rd}"

result_label2.config(text=f"{desc_9}\n{desc_10}\n{desc_11}\n{desc_12}\n{desc_13}\n{desc_14}\n{desc_15}\n{desc_16}\n{desc_17}")

result_label2.grid(row=49, column=0, columnspan=2, pady=10)

result_label1.grid_forget()

result_label3.grid_forget()

result_label4.grid_forget()

result_label5.grid_forget()

if doubletype.lower() == "parallel":

fig = Figure()

ax = fig.add_subplot(111)

ax.set_title("Tkinter Embedded Matplotlib Plot")

b = 1/(mc*cpc)

B = 1/(mh*cph)

x = np.arange(math.ceil(l))

thx = (((b/B)np.ones(math.ceil(l))+np.exp(-ud(B+b)3.14*D*x))*th1+(np.ones(math.ceil(l))-np.exp(-ud(B+b)*3.14*D*x))*tc1)/(1+(b/B))

tcx = (((B/b)-1)th1+(((B/b)*np.exp(ud(B-b)3.14*D*l))-(B/b))*tc1)/((B/b)*np.exp(ud(B-b)3.14*D*l)-np.ones(math.ceil(l)))+th1+(((B/b)-1)*th1+(((B/b)*np.exp(ud(B-b)3.14*D*l))-(B/b))*tc1)/((B/b)*np.exp(ud(B-b)*3.14*D*l)-np.ones(math.ceil(l)))

ax.plot(x, thx,label='hot')

ax.plot(x, tcx, label='cold')

ax.set_xlabel("X-axis")

ax.set_ylabel("Y-axis")

# Create a canvas widget to embed the plot into the Tkinter window

canvas1 = FigureCanvasTkAgg(fig, master=window)

canvas1.draw()

# Place the canvas widget using the grid layout

canvas1.get_tk_widget().grid(row=40, column=0)

plt.show()

# for shell and tube heat exchanger

elif heatexchanger.lower()=="shellandtubeheatexchanger":

shellandtubeheat_exchanger()

epsi = math.sqrt(((mc*cpc)*(-2))+((mh*cph)*(-2)))

nt = ntp*n1

#C = pt-do

at = (nt*3.14*(d**2))/(4*n1)

gt = mt/at

tw = (th1+th2+tc1+tc2)/4

N = ((l5-0.2*ds)/lb)-1

N = math.floor(N)

while True:

global Np,Wp,lsb,ltb,lbb,do,pt,rds,rdt,bpercent,layout_type,lbout,lbin,nss,pitch,ms,cps,cpt,tsavg,ttavg,tube,shell,sgs,sgt,ut,uwt,us,uws,kt,ks

phis = (us/uws)**0.14

phit = (ut/uwt)**0.14

ret = (d*gt)/ut

prt = (cpt*ut)/kt

if ret<2100:

nut = 1.86*phit*((ret*prt*(d/l5))**(1/3))

elif ret>4000:

nut = 0.027*phit*(prt*(1/3))(ret**0.8)

hi=(kt*nut)/d

prs = (us*cps)/ks

def re_constant(res):

if 10000<res<=100000:

rek = '100000-10000'

elif 1000<res<=10000:

rek = '10000-1000'

elif 100<res<=1000:

rek = '1000-100'

elif 10<res<=100:

rek = '100-10'

elif res<10:

rek = '<10'

return rek

def diff_constants(res2,layout_type):

excel_file = 'value_of_constants.xlsx'

constants = 'Sheet1'

constants_df = pd.read_excel(excel_file, sheet_name=constants)

mask = (constants_df['Reynolds Number'] == res2) & (constants_df['layout angle'] == layout_type)

constants_value = constants_df.loc[mask, 'a1':'b4'].values.flatten().astype(float)

return constants_value

def k1n2(n1,pitch):

excel_file = 'value_of_constants.xlsx'

kconstant = 'Sheet4'

kconstant_df = pd.read_excel(excel_file, sheet_name=kconstant)

if pitch=='triangular':

kconstantk1 = kconstant_df.loc[kconstant_df['Number Passes'] == n1, 'TPK1'].values.flatten().astype(float)

kconstantn2 = kconstant_df.loc[kconstant_df['Number Passes'] == n1, 'TPN2'].values.flatten().astype(float)

elif pitch=='square':

kconstantk1 = kconstant_df.loc[kconstant_df['Number Passes'] == n1, 'SPK1'].values.flatten().astype(float)

kconstantn2 = kconstant_df.loc[kconstant_df['Number Passes'] == n1, 'SPN2'].values.flatten().astype(float)

return kconstantk1, kconstantn2

new_constant = k1n2(n1,pitch)

k1 = new_constant[0]

n2 = new_constant[1]

dotl = do*(nt/k1)**(1/n2)

if layout_type==30:

pn = (pt/2.0)

sm = lb*(ds-dotl+((dotl-do)/pt)*(pt-do))

pp = (math.sqrt(3)/2)*pt

elif layout_type==45:

pn = pt/math.sqrt(2)

sm = lb*(ds-dotl+((dotl-do)/pn)*(pt-do))

pp = pt/math.sqrt(2)

elif layout_type==90:

pn = pt

sm = lb*(ds-dotl+((dotl-do)/pt)*(pt-do))

pp = pt

res = (do*ms)/(us*sm)

lc = (bpercent*ds)/100

nc=math.floor((ds/pp)(1-(2(bpercent/100))))

res2 = re_constant(res)

gs = ms/sm

constant = diff_constants(res2,layout_type)

a1 = (constant[0])

a2 = (constant[1])

a3 = (constant[2])

a4 = (constant[3])

b1 = (constant[4])

b2 = (constant[5])

b3 = (constant[6])

b4 = (constant[7])

a = a3/(1+0.14*(res**a4))

jh = a1*(res*a2)(((1.33*do)/pt)**a)

hid = jh*gs*cps*((prs)**(-2.0/3))*phis

ftc = (1/math.pi)(math.pi+2((ds-2*lc)/(dotl-do))*math.sin(math.acos((ds-2*lc)/(dotl-do)))-2*math.acos((ds-2*lc)/(dotl-do)))

jc = 0.55+0.72*ftc

stb = (pi*ltb*do*nt*(1+ftc))/(4.0)

ssb = ((ds* lsb)/2)*(math.pi-math.acos(1-((2*lc)/ds)))

alpha = 0.44 * (stb/(stb+ssb))

jl = alpha + (1-alpha)(math.exp(-2.2((stb+ssb)/sm)))

fbp = ((ds-dotl+0.5*Np*Wp)/sm)*lb

if res<=100:

cbh = 1.35

elif res>100:

cbh = 1.25

if (nss/nc)>=0.5:

jb = 1

elif (nss/nc)<0.5:

jb = math.exp(-cbh*fbp*(1-((2*nss/nc)**(1/3))))

ncw = (0.8*(lc-0.5*(ds+do-dotl)))/(pp)

nr = (nc+ncw)*(N+1)

jrr = 1.51/(nr**0.18)

if res>100:

jr = 1

elif 20<=res<=100:

jr = jrr-((1-jrr)*(0.25-0.0125*res))

elif res<20:

jr = jrr

if res<100:

n3 = 0.333

elif res>100:

n3 = 0.6

lin = (lbin/lb)

lout = (lbout/lb)

if ((0.95*lb)<=lbin<=(1.05*lb)) and ((0.95*lb)<=lbout<=(1.05*lb)):

js = 1

else:

js = ((N-1)+(lin*(1-n3))+(lout*(1-n3)))/(N-1+lin+lout)

ho = hid*jc*jl*jb*jr*js

tw1 = (hi*ttavg+ho*tsavg*(do/d))/(hi+ho*(do/d))

if data_input=='input':

tw=tw1

elif data_input=='database':

if tw!=tw1:

tw=tw1

continue

if kw==-1:

Uc=1/((do/(hi*d))+(1/ho))

else:

Uc=1/((do/(hi*d))+((do/(2*kw))*(math.log(do/d)))+(1/ho))

if kw==-1:

ud2=1/((do/(hi*d))+(1/ho)+((do/d)*rdt)+rds)

else:

ud2=1/((do/(hi*d))+((do/(2*kw))*(math.log(do/d)))+(1/ho)+((do/d)*rdt)+rds)

A=(3.14*do*nt*l5)

ud1 = math.log(abs((((2*tam)/q)+epsi)/(((2*tam)/q)-epsi)))/(A*epsi)

rdo = (1/ud2)-(1/ud1)

if rdo<0:

desc_10 = "The given heat exchanger is underdesigned according to the specified fouling factor."

result_label5.config(text=f"{desc_10}")

result_label5.grid(row=50, column=0, columnspan=2, pady=10)

result_label2.grid_forget()

result_label1.grid_forget()

result_label4.grid_forget()

result_label3.grid_forget()

break

elif rdo>0:

rhot = sgt*1000

if ret<2100:

ft=16/ret

elif ret>4000:

ft=(0.0035+(0.264/((d*gt/ut)**0.42)))

delpt = (2*ft*(gt**2)*l5*n1)/(2*rhot*d*phit)

delpr = (2*n1*(gt**2))/(rhot)

delpT = delpt + delpr

rhos = sgs*1000

I=(l5/lb)-1

I=math.floor(I)

b = b3/(1+0.14*(res**b4))

fs = b1*(res*b2)(((1.33*do)/pt)**b)

pid = (2*fs*nc*(gs**2))/(rhos*phis)

sw = ((ds*2)/4)((math.acos(1-2*(lc/ds)))-(1-2*(lc/ds))(math.sqrt(1-(1-2(lc/ds))*2)))-((nt/8)(1-ftc)math.pi(do**2))

dw = (4*sw)/((math.pi/2)nt(1-ftc)do+(ds*math.acos(1-2(lc/ds))))

if res<=100:

pw = 0.026*(((ms)us)/(rhos*math.sqrt(sm*sw)))((ncw/(pt-do))+(lb/(dw*2)))+(ms*2)/(rhos*math.sqrt(sm*sw))

elif res>100:

pw = (2+(0.6*ncw))((ms*2)/(2*rhos*math.sqrt(sm*sw)))

n4 = -0.15*(1+(ssb/(ssb+stb)))+0.8

rl = math.exp(-1.33*(1+(ssb/(ssb+stb)))(((stb+ssb)/sm)*n4))

if res<=100:

cbp = 4.5

elif res>100:

cbp = 3.7

if (nss/nc)>=0.5:

rb = 1

elif (nss/nc)<0.5:

rb = math.exp(-cbp*fbp*(1-((nss/nc)**(1/3))))

if res<=100:

n5 = 1

elif res>100:

n5 = 0.2

if ((0.95*lb)<=lbin<=(1.05*lb)) and ((0.95*lb)<=lbout<=(1.05*lb)):

rs = 2

else:

rs = (lin*(n5-2))+(lout*(n5-2))

delps = rb*(pid)((N-1)*rl+2(1+(ncw/nc))*rs)+N*rl*pw

if delps<p_allowed and delpT<p1_allowed:

global desc_1, desc_2, desc_3, desc_4, desc_5, desc_6, desc_7

desc_1 = "calculated pressure drop is within the limit then the give heat exchanger is allowed to work"

desc_2 = f'the area of the heat exchanger is {A}'

desc_3 = f"dirty heat transfer coefficient is {ud2}"

desc_4 = f"clean heat transfer coefficient is {Uc}"

desc_5 = f"the heat duty is {q}"

desc_6 = f"pressure drop at tube side is {delpT}"

desc_7 = f"pressure drop at shell side is {delps}"

result_label3.config(text=f"{desc_1}\n{desc_2}\n{desc_3}\n{desc_4}\n{desc_5}\n{desc_6}\n{desc_7}")

result_label3.grid(row=50, column=0, columnspan=2, pady=10)

result_label2.grid_forget()

result_label1.grid_forget()

result_label4.grid_forget()

result_label5.grid_forget()

else:

global desc_8

desc_8 = "calculated pressure drop is not within the permissibe limit then the give heat exchanger is not allowed to work"

result_label4.config(text=f"{desc_8}")

result_label4.grid(row=51, column=0, columnspan=2, pady=10)

result_label2.grid_forget()

result_label3.grid_forget()

result_label1.grid_forget()

result_label5.grid_forget()

break

def show_inputfunc():

label_cpc.grid(row=16, column=0, padx=10, pady=5, sticky="e")

entry_cpc.grid(row=16, column=1, padx=10, pady=5, sticky="w")

label_cph.grid(row=17, column=0, padx=10, pady=5, sticky="e")

entry_cph.grid(row=17, column=1, padx=10, pady=5, sticky="w")

label_uh.grid(row=18, column=0, padx=10, pady=5, sticky="e")

entry_uh.grid(row=18, column=1, padx=10, pady=5, sticky="w")

label_uc.grid(row=19, column=0, padx=10, pady=5, sticky="e")

entry_uc.grid(row=19, column=1, padx=10, pady=5, sticky="w")

label_uwh.grid(row=20, column=0, padx=10, pady=5, sticky="e")

entry_uwh.grid(row=20, column=1, padx=10, pady=5, sticky="w")

label_uwc.grid(row=21, column=0, padx=10, pady=5, sticky="e")

entry_uwc.grid(row=21, column=1, padx=10, pady=5, sticky="w")

label_kh.grid(row=22, column=0, padx=10, pady=5, sticky="e")

entry_kh.grid(row=22, column=1, padx=10, pady=5, sticky="w")

label_kc.grid(row=23, column=0, padx=10, pady=5, sticky="e")

entry_kc.grid(row=23, column=1, padx=10, pady=5, sticky="w")

def show_database_func():

label_cpc.grid_forget()

entry_cpc.grid_forget()

label_cph.grid_forget()

entry_cph.grid_forget()

label_uh.grid_forget()

entry_uh.grid_forget()

label_uc.grid_forget()

entry_uc.grid_forget()

label_uwh.grid_forget()

entry_uwh.grid_forget()

label_uwc.grid_forget()

entry_uwc.grid_forget()

label_kh.grid_forget()

entry_kh.grid_forget()

label_kc.grid_forget()

entry_kc.grid_forget()

def show_doublepipeheat_exchanger():

label_doubletype.grid(row=25, column=0, padx=10, pady=5, sticky="e")

entry_doubletype.grid(row=25, column=1, padx=10, pady=5, sticky="w")

label_D.grid(row=26, column=0, padx=10, pady=5, sticky="e")

entry_D.grid(row=26, column=1, padx=10, pady=5, sticky="w")

label_D1.grid(row=27, column=0, padx=10, pady=5, sticky="e")

entry_D1.grid(row=27, column=1, padx=10, pady=5, sticky="w")

label_D2.grid(row=28, column=0, padx=10, pady=5, sticky="e")

entry_D2.grid(row=28, column=1, padx=10, pady=5, sticky="w")

label_l.grid(row=29, column=0, padx=10, pady=5, sticky="e")

entry_l.grid(row=29, column=1, padx=10, pady=5, sticky="w")

label_M.grid_forget()

entry_M.grid_forget()

label_question.grid_forget()

entry_question.grid_forget()

label_Np.grid_forget()

entry_Np.grid_forget()

label_Wp.grid_forget()

entry_Wp.grid_forget()

label_lsb.grid_forget()

entry_lsb.grid_forget()

label_ltb.grid_forget()

entry_ltb.grid_forget()

label_lbb.grid_forget()

entry_lbb.grid_forget()

label_ntp.grid_forget()

entry_ntp.grid_forget()

label_n1.grid_forget()

entry_n1.grid_forget()

label_d.grid_forget()

entry_d.grid_forget()

label_do.grid_forget()

entry_do.grid_forget()

label_ds.grid_forget()

entry_ds.grid_forget()

label_lb.grid_forget()

entry_lb.grid_forget()

label_pt.grid_forget()

entry_pt.grid_forget()

label_rds.grid_forget()

entry_rds.grid_forget()

label_rdt.grid_forget()

entry_rdt.grid_forget()

label_bpercent.grid_forget()

entry_bpercent.grid_forget()

label_layout_type.grid_forget()

entry_layout_type.grid_forget()

label_lbout.grid_forget()

entry_lbout.grid_forget()

label_lbin.grid_forget()

entry_lbin.grid_forget()

label_nss.grid_forget()

entry_nss.grid_forget()

label_pitch.grid_forget()

entry_pitch.grid_forget()

label_l5.grid_forget()

entry_l5.grid_forget()

def show_shellandtubeheatexchanger():

label_doubletype.grid_forget()

entry_doubletype.grid_forget()

label_D.pack_forget()

entry_D.pack_forget()

label_D1.pack_forget()

entry_D1.pack_forget()

label_D2.pack_forget()

entry_D2.pack_forget()

label_l.grid_forget()

entry_l.grid_forget()

label_M.grid(row=25, column=0, padx=10, pady=5, sticky="e")

entry_M.grid(row=25, column=1, padx=10, pady=5, sticky="w")

label_question.grid(row=26, column=0, padx=10, pady=5, sticky="e")

entry_question.grid(row=26, column=1, padx=10, pady=5, sticky="w")

label_Np.grid(row=27, column=0, padx=10, pady=5, sticky="e")

entry_Np.grid(row=27, column=1, padx=10, pady=5, sticky="w")

label_Wp.grid(row=28, column=0, padx=10, pady=5, sticky="e")

entry_Wp.grid(row=28, column=1, padx=10, pady=5, sticky="w")

label_ntp.grid(row=29, column=0, padx=10, pady=5, sticky="e")

entry_ntp.grid(row=29, column=1, padx=10, pady=5, sticky="w")

label_lsb.grid(row=30, column=0, padx=10, pady=5, sticky="e")

entry_lsb.grid(row=30, column=1, padx=10, pady=5, sticky="w")

label_ltb.grid(row=31, column=0, padx=10, pady=5, sticky="e")

entry_ltb.grid(row=31, column=1, padx=10, pady=5, sticky="w")

label_lbb.grid(row=32, column=0, padx=10, pady=5, sticky="e")

entry_lbb.grid(row=32, column=1, padx=10, pady=5, sticky="w")

label_n1.grid(row=33, column=0, padx=10, pady=5, sticky="e")

entry_n1.grid(row=33, column=1, padx=10, pady=5, sticky="w")

label_d.grid(row=34, column=0, padx=10, pady=5, sticky="e")

entry_d.grid(row=34, column=1, padx=10, pady=5, sticky="w")

label_do.grid(row=35, column=0, padx=10, pady=5, sticky="e")

entry_do.grid(row=35, column=1, padx=10, pady=5, sticky="w")

label_ds.grid(row=36, column=0, padx=10, pady=5, sticky="e")

entry_ds.grid(row=36, column=1, padx=10, pady=5, sticky="w")

label_lb.grid(row=37, column=0, padx=10, pady=5, sticky="e")

entry_lb.grid(row=37, column=1, padx=10, pady=5, sticky="w")

label_pt.grid(row=38, column=0, padx=10, pady=5, sticky="e")

entry_pt.grid(row=38, column=1, padx=10, pady=5, sticky="w")

label_rds.grid(row=39, column=0, padx=10, pady=5, sticky="e")

entry_rds.grid(row=39, column=1, padx=10, pady=5, sticky="w")

label_rdt.grid(row=40, column=0, padx=10, pady=5, sticky="e")

entry_rdt.grid(row=40, column=1, padx=10, pady=5, sticky="w")

label_bpercent.grid(row=41, column=0, padx=10, pady=5, sticky="e")

entry_bpercent.grid(row=41, column=1, padx=10, pady=5, sticky="w")

label_layout_type.grid(row=42, column=0, padx=10, pady=5, sticky="e")

entry_layout_type.grid(row=42, column=1, padx=10, pady=5, sticky="w")

label_lbout.grid(row=43, column=0, padx=10, pady=5, sticky="e")

entry_lbout.grid(row=43, column=1, padx=10, pady=5, sticky="w")

label_lbin.grid(row=44, column=0, padx=10, pady=5, sticky="e")

entry_lbin.grid(row=44, column=1, padx=10, pady=5, sticky="w")

label_nss.grid(row=45, column=0, padx=10, pady=5, sticky="e")

entry_nss.grid(row=45, column=1, padx=10, pady=5, sticky="w")

label_pitch.grid(row=46, column=0, padx=10, pady=5, sticky="e")

entry_pitch.grid(row=46, column=1, padx=10, pady=5, sticky="w")

label_l5.grid(row=47, column=0, padx=10, pady=5, sticky="e")

entry_l5.grid(row=47, column=1, padx=10, pady=5, sticky="w")

# building Gui

window = tk.Tk()

window.title("Heat Exchanger Design")

# Configure window size and background color

screen_width = window.winfo_screenwidth()

screen_height = window.winfo_screenheight()

# Set the window size to match the screen size

window.geometry(f"{screen_width}x{screen_height}")

window.configure(bg="#F0F0F0")

canvas = tk.Canvas(window)

canvas.grid(row=0, column=0, sticky="nsew")

frame = tk.Frame(canvas)

canvas.create_window((0, 0), window=frame, anchor="nw")

scrollbar =tk.Scrollbar(window, orient=tk.VERTICAL, command=canvas.yview)

scrollbar.grid(row=0, column=20, sticky="ns")

canvas.config(yscrollcommand=scrollbar.set)

# Function to set a consistent style for labels and entries

def set_style(widget):

widget.configure(bg="#F0F0F0", font=("Arial", 12))

choice = tk.IntVar()

label_mc = Label(frame, text="Mass flow rate of cold fluid(Kg/s):")

set_style(label_mc)

label_mc.grid(row=0, column=0, padx=10, pady=5, sticky="e")

entry_mc = Entry(frame)

set_style(entry_mc)

entry_mc.grid(row=0, column=1, padx=10, pady=5, sticky="w")

label_mh = Label(frame, text="Mass flow rate of hot fluid(kg/s):")

set_style(label_mh)

label_mh.grid(row=1, column=0, padx=10, pady=5, sticky="e")

entry_mh = Entry(frame)

set_style(entry_mh)

entry_mh.grid(row=1, column=1, padx=10, pady=5, sticky="w")

label_tc1 = Label(frame, text="inlet temperature of cold fluid(K):")

set_style(label_tc1)

label_tc1.grid(row=2, column=0, padx=10, pady=5, sticky="e")

entry_tc1 = Entry(frame)

set_style(entry_tc1)

entry_tc1.grid(row=2, column=1, padx=10, pady=5, sticky="w")

label_th1 = Label(frame, text="inlet temperature of hot fluid(K):")

set_style(label_th1)

label_th1.grid(row=3, column=0, padx=10, pady=5, sticky="e")

entry_th1 = Entry(frame)

set_style(entry_th1)

entry_th1.grid(row=3, column=1, padx=10, pady=5, sticky="w")

label_th2 = Label(frame, text="outlet temperature of hot fluid(K):")

set_style(label_th2)

label_th2.grid(row=4, column=0, padx=10, pady=5, sticky="e")

entry_th2 = Entry(frame)

set_style(entry_th2)

entry_th2.grid(row=4, column=1, padx=10, pady=5, sticky="w")

label_tc2 = Label(frame, text="outlet temperature of cold fluid(K):")

set_style(label_tc2)

label_tc2.grid(row=5, column=0, padx=10, pady=5, sticky="e")

entry_tc2 = Entry(frame)

set_style(entry_tc2)

entry_tc2.grid(row=5, column=1, padx=10, pady=5, sticky="w")

label_kw = Label(frame, text="kw:")

set_style(label_kw)

label_kw.grid(row=7, column=0, padx=10, pady=5, sticky="e")

entry_kw = Entry(frame)

set_style(entry_kw)

entry_kw.grid(row=7, column=1, padx=10, pady=5, sticky="w")

label_hot = Label(frame, text="name of hot fluid:")

set_style(label_hot)

label_hot.grid(row=8, column=0, padx=10, pady=5, sticky="e")

entry_hot = Entry(frame)

set_style(entry_hot)

entry_hot.grid(row=8, column=1, padx=10, pady=5, sticky="w")

label_cold = Label(frame, text="name of cold fluid:")

set_style(label_cold)

label_cold.grid(row=9, column=0, padx=10, pady=5, sticky="e")

entry_cold = Entry(frame)

set_style(entry_cold)

entry_cold.grid(row=9, column=1, padx=10, pady=5, sticky="w")

label_Rd = Label(frame, text="allowable dirt factor(K(m^2)/W):")

set_style(label_Rd)

label_Rd.grid(row=10, column=0, padx=10, pady=5, sticky="e")

entry_Rd = Entry(frame)

set_style(entry_Rd)

entry_Rd.grid(row=10, column=1, padx=10, pady=5, sticky="w")

label_p_allowed = Label(frame, text="enter the allowable pressure drop shell side or annulus(pascal):")

set_style(label_p_allowed)

label_p_allowed.grid(row=11, column=0, padx=10, pady=5, sticky="e")

entry_p_allowed = Entry(frame)

set_style(entry_p_allowed)

entry_p_allowed.grid(row=11, column=1, padx=10, pady=5, sticky="w")

label_p1_allowed = Label(frame, text="enter the allowed pressure drop tube side or pipe(pascal):")

set_style(label_p1_allowed)

label_p1_allowed.grid(row=12, column=0, padx=10, pady=5, sticky="e")

entry_p1_allowed = Entry(frame)

set_style(entry_p1_allowed)

entry_p1_allowed.grid(row=12, column=1, padx=10, pady=5, sticky="w")

label_sgh = Label(frame, text="specific gravity of hot fluid:")

set_style(label_sgh)

label_sgh.grid(row=13, column=0, padx=10, pady=5, sticky="e")

entry_sgh = Entry(frame)

set_style(entry_sgh)

entry_sgh.grid(row=13, column=1, padx=10, pady=5, sticky="w")

label_sgc = Label(frame, text="specific gravity of cold fluid:")

set_style(label_sgc)

label_sgc.grid(row=14, column=0, padx=10, pady=5, sticky="e")

entry_sgc = Entry(frame)

set_style(entry_sgc)

entry_sgc.grid(row=14, column=1, padx=10, pady=5, sticky="w")

label_data_type = Label(frame, text="data type")

set_style(label_data_type)

label_data_type.grid(row=15, column=0, padx=10, pady=5, sticky="e")

data1 = tk.StringVar()

radio_input = tk.Radiobutton(frame, text="input", variable=data1, value="input", command = show_inputfunc)

radio_input.grid(row=15,column=1, padx=10, pady=5)

radio_database = tk.Radiobutton(frame, text="database", variable=data1, value="database", command = show_database_func)

radio_database.grid(row=15,column=2,padx=10,pady=5)

label_cpc = Label(frame, text="specific heat capacity of cold fluid(J/Kg*K):")

set_style(label_cpc)

entry_cpc = Entry(frame)

set_style(entry_cpc)

label_cph = Label(frame, text="specific heat capacity of hot fluid(J/Kg*K):")

set_style(label_cph)

entry_cph = Entry(frame)

set_style(entry_cph)

label_uh = Label(frame, text="viscosity of hot fluid at average temperature(kg/m*s):")

set_style(label_uh)

entry_uh = Entry(frame)

set_style(entry_uh)

label_uc = Label(frame, text="viscosity of cold fluid at average temperature(kg/m*s):")

set_style(label_uc)

entry_uc = Entry(frame)

set_style(entry_uc)

label_uwh = Label(frame, text="viscosity of hot fluid at wall temperature(kg/m*s):")

set_style(label_uwh)

entry_uwh = Entry(frame)

set_style(entry_uwh)

label_uwc = Label(frame, text="viscosity of cold fluid at wall temperature(kg/m*s):")

set_style(label_uwc)

entry_uwc = Entry(frame)

set_style(entry_uwc)

label_kh = Label(frame, text="thermal conductivity of hot fluid at average temperature(W/m*K):")

set_style(label_kh)

entry_kh = Entry(frame)

set_style(entry_kh)

label_kc = Label(frame, text="thermal conductivity of cold fluid at average temperature(W/m*K):")

set_style(label_kc)

entry_kc = Entry(frame)

set_style(entry_kc)

label_heatexchanger = Label(frame, text="heat exchanger")

set_style(label_heatexchanger)

label_heatexchanger.grid(row=24, column=0, padx=10, pady=5, sticky="e")

heat1 = tk.StringVar()

radio_doublepipe = tk.Radiobutton(frame, text="double pipe", variable=heat1, value="doublepipeheatexchanger", command = show_doublepipeheat_exchanger)

radio_doublepipe.grid(row=24, column=1, padx=10, pady=5)

radio_shellandtube = tk.Radiobutton(frame, text="shell and tube", variable=heat1, value="shellandtubeheatexchanger", command = show_shellandtubeheatexchanger)

radio_shellandtube.grid(row=24, column=2, padx=10, pady=5)

# for double pipe heat exchanger

label_doubletype = Label(frame, text="parallel or countercurrent:")

set_style(label_doubletype)

entry_doubletype = Entry(frame)

set_style(entry_doubletype)

label_D = Label(frame, text="inner diameter of pipe(m):")

set_style(label_D)

entry_D = Entry(frame)

set_style(entry_D)

label_D1 = Label(frame, text="outer diameter of pipe(m):")

set_style(label_D1)

entry_D1 = Entry(frame)

set_style(entry_D1)

label_D2 = Label(frame, text="inner diameter of annulus(m):")

set_style(label_D2)

entry_D2 = Entry(frame)

set_style(entry_D2)

label_l = Label(frame, text="enter the lenth of one hairpin(m):")

set_style(label_l)

entry_l = Entry(frame)

set_style(entry_l)

# for shell and tube heat exchanger

label_M = Label(frame, text="Number of shell passes:")

set_style(label_M)

entry_M = Entry(frame)

set_style(entry_M)

label_question = Label(frame, text="enter if the hot should go in 'tube' or shell:")

set_style(label_question)

entry_question = Entry(frame)

set_style(entry_question)

label_Np = Label(frame, text="enter the number of pass divider lanes:")

set_style(label_Np)

entry_Np = Entry(frame)

set_style(entry_Np)

label_Wp = Label(frame, text="enter the width of bypass lane(m):")

set_style(label_Wp)

entry_Wp = Entry(frame)

set_style(entry_Wp)

label_ntp = Label(frame, text="Number of tube per pass:")

set_style(label_ntp)

entry_ntp = Entry(frame)

set_style(entry_ntp)

label_lsb = Label(frame, text="enter the shell to baffle clearance(m):")

set_style(label_lsb)

entry_lsb = Entry(frame)

set_style(entry_lsb)

label_ltb = Label(frame, text="enter the tube outside diameter to baffle hole clearance(m):")

set_style(label_ltb)

entry_ltb = Entry(frame)

set_style(entry_ltb)

label_lbb = Label(frame, text="enter the shell diameter to bundle bypass clearance(m):")

set_style(label_lbb)

entry_lbb = Entry(frame)

set_style(entry_lbb)

label_n1 = Label(frame, text="number of tube passes:")

set_style(label_n1)

entry_n1 = Entry(frame)

set_style(entry_n1)

label_d = Label(frame, text="inner diameter of tube(m):")

set_style(label_d)

entry_d = Entry(frame)

set_style(entry_d)

label_do = Label(frame, text="outer diameter of tube(m):")

set_style(label_do)

entry_do = Entry(frame)

set_style(entry_do)

label_ds = Label(frame, text="inner diameter of shell(m):")

set_style(label_ds)

entry_ds = Entry(frame)

set_style(entry_ds)

label_lb = Label(frame, text="baffle spacing(m):")

set_style(label_lb)

entry_lb = Entry(frame)

set_style(entry_lb)

label_pt = Label(frame, text="tube pitch(m):")

set_style(label_pt)

entry_pt = Entry(frame)

set_style(entry_pt)

label_rds = Label(frame, text="shell side dirt factor((K*(m^2))/W):")

set_style(label_rds)

entry_rds = Entry(frame)

set_style(entry_rds)

label_rdt = Label(frame, text="tube side dirt factor((K*(m^2))/W):")

set_style(label_rdt)

entry_rdt = Entry(frame)

set_style(entry_rdt)

label_bpercent = Label(frame, text="enter the percentage of baffle cut:")

set_style(label_bpercent)

entry_bpercent = Entry(frame)

set_style(entry_bpercent)

label_layout_type = Label(frame, text="enter the layout type in degrees:")

set_style(label_layout_type)

entry_layout_type = Entry(frame)

set_style(entry_layout_type)

label_lbout = Label(frame, text="enter the baffle spacing in outlet(m):")

set_style(label_lbout)

entry_lbout = Entry(frame)

set_style(entry_lbout)

label_lbin = Label(frame, text="enter the baffle spacing in inlet(m):")

set_style(label_lbin)

entry_lbin = Entry(frame)

set_style(entry_lbin)

label_nss = Label(frame, text="number of sealing strip:")

set_style(label_nss)

entry_nss = Entry(frame)

set_style(entry_nss)

label_pitch = Label(frame, text="what is the pitch type:")

set_style(label_pitch)

entry_pitch = Entry(frame)

set_style(entry_pitch)

label_l5 = Label(frame, text="length of tube per pass:")

set_style(label_l5)

entry_l5 = Entry(frame)

set_style(entry_l5)

def on_frame_configure(event):

canvas.configure(scrollregion=canvas.bbox("all"))

frame.bind("<Configure>", on_frame_configure)

calculate_button = Button(frame, text="Calculate", command=solve_equations, bg="#4CAF50", fg="white", font=("Arial", 14))

calculate_button.grid(row=48, column=0, columnspan=2, pady=20)

window.grid_rowconfigure(0, weight=1)

window.grid_columnconfigure(0, weight=1)

result_label1 = Label(frame, text="", bg="#F0F0F0", font=("Arial", 14))

result_label2 = Label(frame, text="", bg="#F0F0F0", font=("Arial", 14))

result_label3 = Label(frame, text="", bg="#F0F0F0", font=("Arial", 14))

result_label4 = Label(frame, text="", bg="#F0F0F0", font=("Arial", 14))

result_label5 = Label(frame, text="", bg="#F0F0F0", font=("Arial", 14))

window.mainloop()

end_time = time.time()

runtime = end_time-start_time

print(f"runtime is {runtime}")
